# Supplementary material
Source: PubMed Central journal article supplement (PMC3789242)
Supplement: NIHMS505190-supplement-Supporting_Information.pdf [file NIHMS505190-supplement-Supporting_Information.pdf]

## **Table of Contents**

Title page

Experimental details for compounds **5, 11-21, 23-29, 3** S2-S24

NMR spectra of compounds **5, 11-21, 23-29, 3** S25-S82

**General Methods.** All non-aqueous reactions were carried out in oven- or flame-dried glassware under an argon atmosphere. All chemicals were purchased from commercial vendors and used as is, unless otherwise specified. Anhydrous tetrahydrofuran (THF) and dichloromethane ( $\text{CH}_2\text{Cl}_2$ ) were obtained from a solvent purification system (Glass Contour). Reactions were magnetically stirred and monitored by thin layer chromatography (TLC) with 250  $\mu\text{m}$  EMD 60 F<sub>254</sub> precoated silica gel plates. Flash column chromatography was performed using Silicycle silica gel P60 (230-400 mesh). Sonication reactions were performed in a Branson 1510 sonicator. FT-IR spectral data were recorded on a Thermo Nicolet FT-IR spectrometer equipped with a Diamond ATR accessory.  $^1\text{H}$  and  $^{13}\text{C}$  NMR spectral data were recorded on Bruker DPX-300, AMX-360 or DRX 400 MHz spectrometers. Chemical shifts are reported relative to chloroform ( $\delta$  7.26), methanol ( $\delta$  3.31), or DMSO ( $\delta$  2.50) for  $^1\text{H}$  NMR and chloroform ( $\delta$  77.2), methanol ( $\delta$  49.0), or DMSO ( $\delta$  39.5) for  $^{13}\text{C}$  NMR. Nominal mass spectra were recorded on Applied Biosystems 150EX. High resolution mass spectra were recorded on a Waters LCT Premier time-of-flight (TOF) mass spectrometer. X-Ray data was collected on a Bruker SMART APEX CCD area detector system.

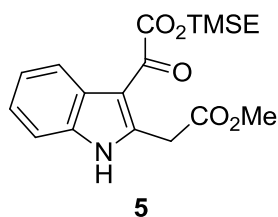

**Synthesis of Keto Diester 5.** To a stirred solution of the readily prepared indole ester **4**<sup>7</sup> (3.50 g, 18.5 mmol) in Et<sub>2</sub>O (310 mL) at 0 °C was added oxalyl chloride (1.84 mL, 21.4 mmol). The resultant orange solution was stirred at rt for 16 h and then cooled to 0 °C. 2-Trimethylsilylethanol (8.0 mL, 55.9 mmol) was added, followed by slow addition of triethylamine (6.4 mL, 47 mmol) over 5 min. The resulting red suspension was stirred at 0 °C for 1.5 h and then diluted with water. The organic layer was separated and the aqueous layer extracted with Et<sub>2</sub>O. The combined organic layers were washed with water and brine, dried over MgSO<sub>4</sub>, and concentrated *in vacuo* to give a viscous red oil which was purified by flash chromatography on silica gel (gradient 20% to 40% EtOAc/hexanes) to yield indole-3-oxoacetate **5** (6.03 g, 90%). <sup>1</sup>H NMR (300 MHz, CDCl<sub>3</sub>) 10.50 (s, 1H), 7.83-7.78 (m, 1H), 7.45-7.40 (m, 1H), 7.30-7.23 (m, 2H), 4.56-4.50 (m, 2H), 4.32 (s, 2H), 3.82 (s, 3H), 1.22-1.16 (m, 2H), 0.10 (s, 9H); <sup>13</sup>C NMR (75 MHz, CDCl<sub>3</sub>) 182.5; 171.3, 166.5, 142.3, 135.4, 126.1, 124.0, 123.4, 120.3, 112.3, 110.5, 65.2, 53.1, 32.9, 17.8, -1.1; LRMS-ES+ *m/z* (relative intensity) 362 (MH<sup>+</sup>, 80); HRMS-ES+ (C<sub>18</sub>H<sub>24</sub>NO<sub>5</sub>Si) calcd 362.1424 (MH<sup>+</sup>), found 362.1416.

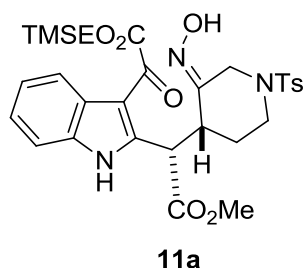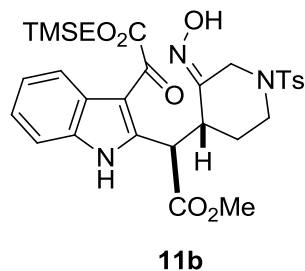

**Synthesis of Nitrosoalkene Michael Adducts 11a/b.** To a  $-78\text{ }^{\circ}\text{C}$  solution of indole **5** (8.18 g, 22.6 mmol) was added LiHMDS (47.5 mL, 47.5 mmol, 1.0 M in THF) and the resulting solution was stirred for 30 min. A solution of  $\alpha$ -chlorooxime **7** (9.6 g, 31.7 mmol) in THF (69 mL) was added via cannula over 10 min. The reaction mixture was stirred at  $-78\text{ }^{\circ}\text{C}$  for 2 h and then diluted with  $\text{NH}_4\text{Cl}_{(\text{aq})}$ . The organic layer was separated and the aqueous layer was extracted with EtOAc. The combined organic layers were dried over  $\text{MgSO}_4$  and concentrated *in vacuo* to give a residue which was purified by flash chromatography on silica gel (gradient 20% to 50% EtOAc/hexanes) to yield diastereomeric Michael adducts **11a** and **11b** (14.01 g, 99%, ~1.2 : 1 by  $^1\text{H}$  NMR) which were carried on to the next step without separation.  $^1\text{H}$  NMR (300 MHz,  $\text{CDCl}_3$ )  $\delta$  10.31 (s, 0.5H), 10.23 (s, 0.5H), 8.90 (s, 0.5H), 8.66 (s, 0.5H), 7.79-7.58 (m, 3H), 7.39-7.17 (m, 5H), 5.59 (d,  $J = 5.9$  Hz, 0.5H), 5.13 (d,  $J = 8.6$  Hz, 0.5H), 4.93 (d,  $J = 14.5$  Hz, 0.5H), 4.60-4.50 (m, 2H), 3.69-4.47 (m, 4H) 3.37 (p,  $J = 5.7$  Hz, 0.5H), 3.20 (d,  $J = 14.6$  Hz, 0.5 H); 3.10 (q,  $J = 7.3$  Hz, 0.5H), 2.97-2.85 (m, 1H), 2.44-2.28 (m, 3H), 2.08-2.03 (m, 0.5H), 1.78-1.76 (m, 0.5H), 1.41-1.31 (m, 0.5H), 0.11-0.07 (m, 9H);  $^{13}\text{C}$  NMR (75 MHz,  $\text{CDCl}_3$ )  $\delta$  183.6, 183.0, 172.6, 171.9, 166.5, 166.5, 152.8, 152.7, 144.61, 144.57, 143.5, 143.4, 135.83, 135.80, 130.4, 130.3, 128.06, 127.96, 125.8, 125.6, 124.4, 124.2, 123.4, 123.2, 120.0, 119.6, 112.9, 112.7, 111.2, 111.1, 65.33, 65.29, 53.3, 53.2, 45.4, 44.9, 44.2, 43.4, 42.9, 42.7,

42.3, 41.9, 27.9, 27.8, 22.0, 21.9, 17.8, 14.6, 14.2, -1.1; LRMS-ES+  $m/z$  (relative intensity) 666 ( $M+K^+$ , 100); HRMS-ES+ ( $C_{30}H_{41}N_4O_8SSi$ ) calcd 645.2414 ( $M+NH_4^+$ ), found 645.2445.

For characterization of the isomers, a small amount of the mixture was separated by flash chromatography on silica gel (gradient 2 to 10%  $Et_2O/CH_2Cl_2$ ) to afford **11a** (less polar) as an orange foamy solid.  $^1H$  NMR (400 MHz,  $CDCl_3$ )  $\delta$  9.96 (s, 1H, NH), 7.91 (s, 1H), 7.62(d,  $J = 8.0$  Hz, 3H), 7.38 (m, 1H), 7.26-7.19 (m, 4H), 5.52 (d,  $J = 6.1$  Hz, 1H), 4.87 (d,  $J = 14.6$  Hz, 1H), 4.50 (t,  $J = 8.2$  Hz, 2H), 3.64 (s, 3H), 3.30 (m, 1H), 3.18 (d,  $J = 14.7$  Hz, 1H), 2.82 (m, 1H), 2.43 (m, 1H), 2.34 (s, 3H), 2.02 (dd,  $J = 3.4, 12.8$  Hz, 1H), 1.38 (m, 1H), 1.15 (t,  $J = 8.7$  Hz, 2H), 0.07 (s, 9H);  $^{13}C$  NMR (75 MHz,  $CDCl_3$ )  $\delta$  183.2, 171.5, 166.0, 153.1, 144.2, 135.3, 133.0, 130.0, 127.7, 125.3, 123.9, 122.9, 119.6, 112.4, 111.1, 64.9, 52.9, 45.0, 43.0, 42.6, 42.0, 27.5, 21.6, 17.5, -1.4. **11b** (more polar, brown foamy solid),  $^1H$  NMR (300 MHz,  $CDCl_3$ )  $\delta$  9.84 (s, 1H), 7.97 (s, 1H), 7.61-7.57 (m, 3H), 7.29-7.23 (m, 2H), 1.17-7.14 (m, 3H), 5.00 (d,  $J = 8.4$  Hz, 1H), 4.50-4.39 (m, 3H), 3.67 (s, 3H), 3.45-3.38 (m, 3H), 2.94 (m, 1H), 2.82 (m, 1H), 2.34 (s, 3H), 1.69 (m, 2H), 1.09-1.05 (m, 2H), 0.00 (s, 9H);  $^{13}C$  NMR (75 MHz,  $CDCl_3$ )  $\delta$  182.9, 172.8, 166.2, 152.9, 144.5, 143.5, 135.7, 133.3, 130.3, 128.1, 125.8, 124.4, 123.4, 120.2, 122.6, 111.2, 65.3, 53.3, 45.0, 44.1, 43.3, 42.0, 28.0, 22.0, 17.8, -1.1.

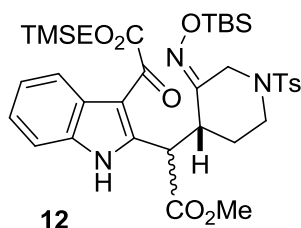

**Synthesis of  $\alpha$ -Ketoester **12**.** To a solution of ester oxime mixture **11a/b** (5.66 g, 9.01 mmol) and imidazole (2.47 g, 36.3 mmol) in  $\text{CH}_2\text{Cl}_2$  (240 mL) was added TBSCl (4.10 g, 27.2 mmol). The resulting suspension was stirred for 12 h at rt and then diluted with 1 M HCl. The organic layer was separated and the aqueous layer was extracted with  $\text{CH}_2\text{Cl}_2$ . The combined organic layers were dried over  $\text{MgSO}_4$  and concentrated *in vacuo* to give a residue which was purified by flash chromatography on silica gel (30% EtOAc/hexanes) yielding *O*-TBS-oximes **12** (5.98 g, 89%) as an orange solid.  $^1\text{H}$  NMR (300 MHz,  $\text{CDCl}_3$ )  $\delta$  9.91 (s, 0.5H), 9.79 (s, 0.5H), 7.77-7.61 (m, 3H), 7.41-7.21 (m, 5H) 5.56 (d,  $J = 5.7$ , 0.5H), 5.06-4.97 (m, 1H), 4.84 (d,  $J = 15.0$ , 0.5H), 4.54-4.45 (m, 2H), 3.69-3.60 (m, 4H), 3.41 (dt,  $J = 7.1, 12.6$  Hz, 0.5H), 3.30 (d,  $J = 15.0$ , 0.5H), 3.18 (d,  $J = 14.9$ , 0.5H), 3.00-2.92 (m, 1H), 2.85-2.70 (m, 0.5H), 2.42 (s, 1.5H) 2.32 (s, 1.5H), 2.06-1.98 (m, 0.5H), 1.85-1.70 (m, 0.5H), 1.65-1.55 (m, 0.5H), 1.40-1.35 (m, 1H), 1.20-1.13 (m, 2H), 0.99 (m, 9H), 0.31-0.20 (m, 6H), 0.10-0.07 (m, 9H);  $^{13}\text{C}$  NMR (75 MHz,  $\text{CDCl}_3$ )  $\delta$  183.4, 182.8, 172.6, 171.0, 166.3, 166.1, 157.9, 156.8, 144.40, 144.37, 143.6, 143.4, 135.5, 135.4, 133.9, 133.6, 130.20, 130.15, 128.0, 127.9, 126.0, 125.7, 124.4, 124.2, 123.5, 123.2, 120.6, 120.0, 112.4, 112.2, 111.3, 65.1, 53.2, 53.0, 45.2, 44.1, 43.5, 43.3, 42.9, 28.1, 27.7, 26.34, 26.28, 21.93, 21.85, 18.3, 18.2, 17.79, 17.76, -1.1, -4.2, -4.6, -4.8; LRMS-ES+  $m/z$  (relative intensity) 780 ( $\text{M}+\text{K}^+$ , 100); HRMS-ES+ ( $\text{C}_{36}\text{H}_{52}\text{N}_3\text{O}_8\text{SSi}_2$ ) calcd 742.3014

(MH<sup>+</sup>), found 742.3005.

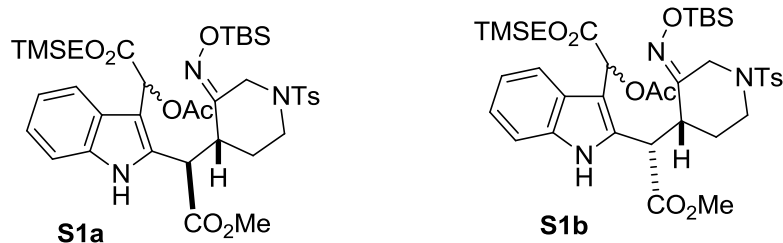

**Synthesis of Acetates S1a/b.** To a stirred solution of  $\alpha$ -ketoesters **12** (21.5 g, 29 mmol) in MeOH (55 mL) and THF (425 mL) cooled to 0 °C was added NaBH<sub>4</sub> (1.32 g, 34.7 mmol). The resulting solution was stirred for 1 h at 0 °C, and then diluted with NH<sub>4</sub>Cl (aq). The organic layer was separated and the aqueous layer was extracted with CH<sub>2</sub>Cl<sub>2</sub>. The combined organic layers were washed with water and brine and then dried over MgSO<sub>4</sub>. Removal of the solvent *in vacuo* provided the indole-3-hydroxyl acetate products as a white powder.

Without further purification, this mixture was dissolved in a 1:1 (v/v) mixture of Ac<sub>2</sub>O:pyridine (292 mL) and the solution was stirred at rt for 12 h. After removing the volatiles *in vacuo*, **S1a** and **S1b** were separated by flash chromatography on silica gel (gradient 15% to 40% EtOAc/hexanes). **S1a** (more polar isomer, orange foamy solid, 12.60 g, 55%, ~3:1 mixture of acetoxy diastereomers): <sup>1</sup>H NMR (400 MHz, CDCl<sub>3</sub>)  $\delta$  9.07 (s, 0.75H), 9.03 (s, 0.25H), 7.75-7.71 (m, 1H), 7.64 (d, *J* = 8.2 Hz, 2H), 7.32-7.13 (m, 5H), 6.21 (s, 0.25H), 6.18 (s, 0.75H), 4.97-4.88 (m, 1H), 4.52 (d, *J* = 5.9 Hz, 0.25H), 4.48 (d, *J* = 5.5 Hz, 0.75H), 4.28-4.20 (m, 1H), 4.09-4.02 (m, 1H), 3.67-3.55 (m, 4H), 3.41-3.31 (m, 2H), 3.00-2.93 (m, 1H), 2.39-2.36 (m, 3H), 2.14 (s, 3H), 1.95-1.70 (m, 3H), 1.60-1.40 (m, 2H), 0.98 (s, 9H), 0.29-0.18 (m, 6H), 0.00-0.02

(m, 9H);  $^{13}\text{C}$  NMR (90 MHz,  $\text{CDCl}_3$ )  $\delta$  171.0, 170.8, 170.6, 170.5, 169.1, 157.3, 144.0, 135.3, 135.2, 133.7, 133.5, 132.2, 131.7, 129.8, 127.6, 126.2, 126.1, 122.7, 120.3, 119.3, 111.2, 108.0, 107.8, 67.7, 64.2, 53.4, 52.5, 44.8, 43.2, 42.9, 42.7, 42.4, 42.1, 28.0, 26.0, 25.9, 21.5, 20.9, 20.7, 17.9, 17.3, -1.56, -1.59, -4.8, -5.1; **S1b** (less polar isomer, orange foamy solid, 8.29 g, 36%, ~2:1 mixture of acetoxyl diastereomers):  $^1\text{H}$  NMR (300 MHz,  $\text{CDCl}_3$ )  $\delta$  8.73-8.71 (m, 1H), 7.76 (d,  $J = 7.6$  Hz, 1H), 7.66 (d,  $J = 8.2$  Hz, 1H), 7.35-7.14 (m, 5H), 6.24-6.22 (m, 1H), 5.02 (t,  $J = 7.1$  Hz, 1H), 4.34-4.07 (m, 3H), 3.66-3.53 (m, 4H), 3.15-3.07 (m, 2H), 2.72 (d,  $J = 11.3$ , 3.2 Hz, 1H), 2.45 (s, 3H), 2.20-2.18 (m, 3H), 1.58-1.39 (m, 2H), 1.00-0.89 (m, 12H), 0.26 (s, 3H), 0.20 (s, 3H), 0.02-0.04 (m, 9H);  $^{13}\text{C}$  NMR (75 MHz,  $\text{CDCl}_3$ )  $\delta$  173.1, 173.0, 170.9, 170.8, 169.3, 169.2, 156.7, 144.4, 136.1, 136.0, 133.8, 133.6, 132.4, 132.2, 130.2, 128.1, 126.7, 123.5, 123.4, 121.1, 120.2, 111.5, 108.54, 108.50, 68.4, 68.0, 64.7, 64.5, 53.9, 53.0, 52.9, 45.4, 44.4, 44.1, 42.8, 42.6, 42.5, 28.5, 28.0, 26.4, 22.0, 21.2, 21.1, 18.4, 17.7, 17.6, -1.2, -4.8, -4.9 (2C); LRMS-ES+ (mixture of diastereomers **S1a/b**)  $m/z$  (relative intensity) 824 ( $\text{M}+\text{K}^+$ , 25); HRMS-ES+ ( $\text{C}_{38}\text{H}_{56}\text{N}_3\text{O}_9\text{SSi}_2$ ) calcd 786.3276 ( $\text{MH}^+$ ), found 786.3286.

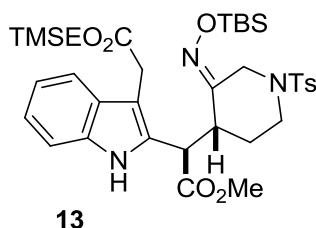

**Synthesis of Indole Diester 13.** To a solution of acetate **S1a** (2.94 g, 3.75 mmol) in *t*-BuOH (80 mL) was added 10% Pd/C (1.20 g). The resulting mixture was



evacuated and backfilled with H<sub>2</sub> from a balloon and TEA (10.0 mL) was then added. The resulting mixture was warmed to 30 °C and stirred for 4 days until all the starting material was consumed as judged by TLC. The reaction mixture was then diluted with EtOAc, filtered through a pad of Celite and concentrated *in vacuo* to give a residue which was purified by flash chromatography on silica gel (gradient 10% to 25% EtOAc/hexanes) to afford indole **13** (2.47 g, 91%) as an off-white foam. <sup>1</sup>H NMR (360 MHz, CDCl<sub>3</sub>) δ 8.74 (br s, 1H), 7.62 (d, *J* = 7.2 Hz, 2H), 7.57 (d, *J* = 7.8 Hz, 1H), 7.28-7.24 (m, 3H), 7.17 (dd, *J* = 7.1, 7.5 Hz, 1H), 7.09 (dd, *J* = 7.3, 7.4 Hz, 1H), 4.82 (d, *J* = 15.1 Hz, 1H), 4.33 (d, *J* = 6 Hz, 1H), 4.11-4.07 (m, 2H), 3.64 (s, 3H), 3.60 (d, *J* = 4.4 Hz, 2H), 3.58-3.55 (m, 1H), 3.36 (d, *J* = 15.2 Hz, 1H), 3.30-3.25 (m, 1H), 2.90 (td, *J* = 4.0, 11.9 Hz, 1H), 2.36 (s, 3H), 1.89-1.84 (m, 1H), 1.59-1.54 (m, 1H), 0.94(s, 9H), 0.21(s, 3H), 0.15(s, 3H); <sup>13</sup>C NMR (75 MHz, CDCl<sub>3</sub>) δ 171.7, 171.6, 157.2, 144.0, 135.4, 133.7, 130.0, 129.9, 129.5, 128.9, 127.7 (2C), 122.3, 119.7, 118.9, 111.0, 107.6, 63.2, 52.5, 44.7, 43.0, 42.7, 42.3, 30.8, 27.6, 26.0, 21.6, 18.0, 17.4, -1.4, -4.8, -5.0; LRMS-ES+ *m/z* (relative intensity) 766 (M+K<sup>+</sup>, 75); HRMS-ES+ (C<sub>36</sub>H<sub>57</sub>N<sub>4</sub>O<sub>7</sub>SSi<sub>2</sub>) calcd 745.3487 (M+NH<sub>4</sub><sup>+</sup>), found 745.3478.

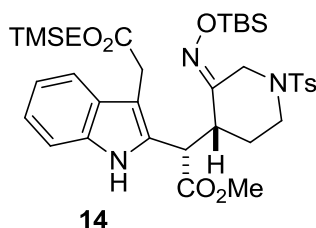

**Synthesis of Indole Diester 14.** Following a similar procedure described for preparation of **13**, acetate **S1b** (3.95 g, 5.03 mmol) was reduced by catalytic

hydrogenation to afford indole diester **14** as an off white foamy solid (3.16 g, 86%):

$^1\text{H}$  NMR (400 MHz,  $\text{CDCl}_3$ )  $\delta$  8.19 (s, 1H), 7.65 (d,  $J = 8.5$  Hz, 2H), 7.57 (d,  $J = 7.7$  Hz, 1H), 7.32 (d,  $J = 8.0$  Hz, 1H), 7.26 (d,  $J = 7.6$  Hz, 1H), 7.17 (dd,  $J = 7.0, 7.1$  Hz, 1H), 7.11 (dd,  $J = 7.1, 7.2$  Hz, 1H), 5.03 (d,  $J = 14.4$  Hz, 1H), 4.17-4.13 (m, 2H), 4.06 (d,  $J = 10.7$  Hz, 1H), 3.64 (app. s, 2H), 3.62 (s, 3H), 3.57 (m, 1H), 3.06-3.00 (m, 2H), 2.66 (td,  $J = 3.8, 11.5$  Hz, 1H), 2.44 (s, 3H), 1.46 (m, 1H), 1.39 (m, 1H), 0.97 (s, 9H), 0.23 (s, 3H), 0.16 (s, 3H);  $^{13}\text{C}$  NMR (75 MHz,  $\text{CDCl}_3$ )  $\delta$  173.0, 171.4, 156.5, 144.0, 135.7, 133.4, 129.8, 128.0 (2C), 127.8, 122.7, 120.1, 119.2, 111.0, 108.3, 63.3, 52.5, 45.2, 43.8, 42.5, 42.0, 30.6, 27.8, 26.1, 25.9, 21.7, 18.1, 17.5, -1.4, -5.1, -5.2; HRMS-ES $^+$  ( $\text{C}_{36}\text{H}_{54}\text{N}_3\text{O}_7\text{SSi}_2$ ) calcd 728.3221 ( $\text{MH}^+$ ), found 728.3224.

**Epimerization of Ester 13 to Ester 14.** To a solution of diester **13** (4.45 g, 6.12 mmol) in THF (81 mL) cooled to  $-78^\circ\text{C}$  was added dropwise KHMDS solution (0.5 M in toluene, 13.5 mL, 6.73 mmol, 1.1 equiv.). After the addition was complete, the cooling bath was removed and the reaction mixture was stirred at rt for 30 min. To the resultant olive green solution was added glacial acetic acid (0.40 mL) followed by saturated  $\text{NH}_4\text{Cl}$  (aq). The mixture was extracted with EtOAc. The organic phase was washed with brine, dried over  $\text{Na}_2\text{SO}_4$  and concentrated. The residue was purified by flash chromatography on silica gel (30% EtOAc/hexanes) to afford diester **14** as a slightly yellow foam (3.23 g, 73%), which was identical to ester **14** prepared from hydrogenation of **S1b**.

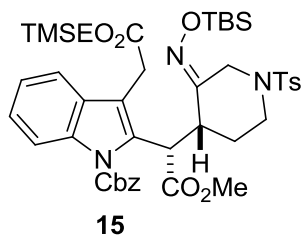

**Synthesis of *N*-Cbz Derivative **15**.** A stirred solution of indole **14** (1.05 g, 1.45 mmol) in acetonitrile (40 mL) was heated to 90 °C. Dibenzyl dicarbonate (2.07 g, 7.24 mmol) was added, followed immediately by DMAP (0.53 g, 4.33 mmol). After gas evolution stopped (~1 min), the reaction mixture was heated at 90 °C for another 2 min, and cooled to rt. The solvent was removed *in vacuo* to give a pale brown residue, which was purified by flash chromatography on silica gel (5 to 20 % EtOAc/hexanes) to afford **15** as a white foam (1.23 g, 99%, ~2:1 Cbz rotamers). <sup>1</sup>H NMR (400 MHz, CDCl<sub>3</sub>) δ 8.11 (d, *J* = 7.6 Hz, 0.7H), 8.00 (m, 0.3H), 7.64 (d, *J* = 6.9 Hz, 2H), 7.57 (d, *J* = 6.4 Hz, 0.7H), 7.46-7.26 (m, 9H), 5.68 (d, *J* = 10.1 Hz, 0.3H), 5.17 (d, *J* = 11.7 Hz, 0.7H), 5.52-5.46 (m, 0.7H), 5.29 (d, *J* = 13.1 Hz, 0.7H), 5.16 (d, *J* = 9.3 Hz, 1.7H), 4.14-4.10 (m, 2H), 3.90 (d, *J* = 15.9 Hz, 0.3H), 3.65-3.53 (m, 2.7H), 3.48 (s, 3H), 3.11 (m, 1H), 2.90 (d, *J* = 13.2 Hz, 0.3H), 2.68 (d, *J* = 13.2 Hz, 0.7H), 2.60 (m, 0.3H), 2.49-2.44 (m, 3H), 2.17 (m, 0.7H), 1.40 (m, 0.3H), 1.12 (m, 1.7H), 0.98 (m, 9H), 0.22 (s, 2H), 0.19-0.17 (m, 4H), 0.02 (s, 9H); <sup>13</sup>C NMR (75 MHz, CDCl<sub>3</sub>) δ 171.7, 171.1, 170.8, 170.1, 155.8, 155.6, 151.8, 151.3, 143.8, 135.9, 135.6, 134.8, 133.4, 132.5, 132.2, 129.8, 129.4, 129.2, 129.0, 128.8, 127.9, 125.3, 123.5, 119.3, 118.9, 118.6, 117.2, 115.8, 69.3, 68.6, 63.6, 63.4, 52.1, 45.7, 42.8, 42.4, 42.0, 41.3, 40.7, 30.9, 30.2, 28.6, 27.5, 26.2, 25.6, 21.7, 18.3, 17.5, -1.5, -5.1; LRMS-ES+ *m/z* (relative intensity) 862 (MH<sup>+</sup>, 90); HRMS-ES<sup>+</sup> (C<sub>44</sub>H<sub>60</sub>N<sub>3</sub>O<sub>9</sub>SSi<sub>2</sub>) calcd 862.3589 (MH<sup>+</sup>), found

862.3585.

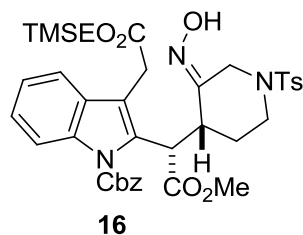

**Synthesis of Oxime 16.** To a stirred solution of *O*-TBS-oxime **15** (12.9 g, 14.9 mmol) in THF (600 mL) was added AcOH (6.6 mL) followed by TBAF (22.1 mL, 22.1 mmol, 1.0 M in THF). The resulting solution was stirred at rt overnight and then diluted with NH<sub>4</sub>Cl (aq). The organic layer was separated and the aqueous layer was extracted with EtOAc. The combined organic layers were dried over MgSO<sub>4</sub> and concentrated *in vacuo* to give a residue which was purified by flash column chromatography on silica gel (30% EtOAc/hexanes) to yield free oxime **16** as a pale foam (11.1 g, 100%, ~2:1 Cbz rotamers). <sup>1</sup>H NMR (400 MHz, CDCl<sub>3</sub>) δ 8.10 (m, 0.7H), 8.0-7.8 (m, 1.3H), 7.65 (d, *J* = 7.1 Hz, 2H), 7.54 (m, 0.7H), 7.45 (m, 3.5H), 7.35-7.26 (m, 6H), 5.68 (m, 0.3H), 5.57 (d, *J* = 11.5 Hz, 0.7H), 5.47 (s, 0.7H), 5.18 (m, 1.4H), 5.07 (m, 1H), 4.13 (m, 2H), 3.87 (m, 0.3H), 3.65-3.59 (m, 3H), 3.48 (s, 3H), 3.09 (m, 1H), 2.91 (0.3H), 2.68 (d, *J* = 13.1 Hz, 0.7H), 2.60 (m, 0.3H), 2.48-2.44 (m, 3H), 2.19 (m, 0.7H), 1.64 (m, 0.4H), 1.40 (m, 0.3H), 1.17 (1.60H), 0.94 (t, *J* = 8.8 Hz, 2H), 0.01 (s, 9H); <sup>13</sup>C NMR (75 MHz, CDCl<sub>3</sub>) δ 172.0, 171.5, 170.8, 170.5, 152.9, 151.8, 151.4, 143.9, 135.8, 135.5, 134.7, 133.0, 132.3, 132.0, 129.8, 129.4, 129.2, 129.1, 129.0, 128.8, 128.6, 127.9, 127.8, 127.1, 125.3, 124.9, 123.5, 123.2, 119.3, 118.6, 117.2, 116.1, 115.9, 69.5, 68.7, 65.4, 64.5, 63.8, 63.4, 52.6, 52.3, 45.7, 42.4, 41.8, 41.0, 40.7, 40.5, 31.0, 30.7, 30.3, 28.5, 27.6, 21.6, 21.1, 19.2, 17.3, 13.8,

-1.5; LRMS-ES+  $m/z$  (relative intensity) 748 ( $MH^+$ , 75); HRMS-ES+ ( $C_{38}H_{46}N_3O_8SSi_2$ ) calcd 748.2724 ( $MH^+$ ), found 748.2690.

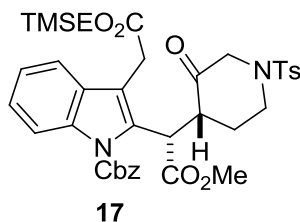

**Synthesis of Ketone 17.** Oxime **16** (11.14 g, 14.9 mmol) was added to a mixture of levulinic acid and 1 M HCl (334 g, 9:1 v/v) and the mixture was stirred at 30 °C for 4.5 h. The reaction mixture was diluted with water (1L), and was extracted with dichloromethane. The organic layer was washed with sat.  $NaHCO_3$ , water and brine, dried over  $Na_2SO_4$ , and concentrated. The residue was purified by flash column chromatography on silica gel (gradient, 20 to 30% EtOAc/hexanes) to afford ketone **17** as a slightly pink foam (10.04 g, 92%).  $^1H$  NMR (400 MHz,  $CDCl_3$ )  $\delta$  8.06 (d,  $J = 7.6$  Hz, 1H), 7.62 (d,  $J = 8.1$  Hz, 2H), 7.55-7.26 (m, 10H), 5.54 (d,  $J = 11.8$  Hz, 1H), 5.20 (d,  $J = 11.6$  Hz, 1H), 4.91 (d,  $J = 6.6$  Hz, 1H), 4.18-4.07 (m, 2H), 4.21 (d,  $J = 13.6$  Hz, 1H), 3.62 (s, 2H), 3.48 (s, 3H), 3.32 (q,  $J = 9.3$  Hz, 1H), 3.20 (d,  $J = 13.6$  Hz, 1H), 2.48 (s, 3H), 2.46 (m, 1H), 1.46-1.42 (m, 2H), 0.95 (t,  $J = 8.6$  Hz, 2H), 0.02 (s, 9H);  $^{13}C$  NMR (75 MHz,  $CDCl_3$ )  $\delta$  201.6, 171.2, 170.2, 151.5, 144.3, 135.4, 134.7, 132.2, 131.7, 130.0, 129.3, 129.1, 128.9, 128.0, 125.4, 123.7, 119.3, 117.4, 115.9, 68.9, 63.8, 56.1, 52.4, 48.8, 45.3, 40.0, 30.8, 27.5, 21.7, 17.4, -1.5; LRMS-ES+  $m/z$  (relative intensity) 750 ( $M+NH_4^+$ , 75); HRMS-ES+ ( $C_{38}H_{48}N_3O_9SSi$ ) calcd 750.2881 ( $M+NH_4^+$ ), found 750.2878.

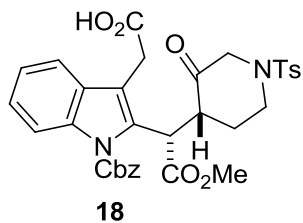

**Synthesis of Keto Acid 18.** To a stirred solution of TMSE-ester **17** (3.95 g, 5.38 mmol) in CH<sub>2</sub>Cl<sub>2</sub> (138 mL) was added TFA (34 mL). The resulting solution was stirred at rt for 9 h and the solvent was removed *in vacuo* to give a residue which was purified by flash column chromatography on silica gel (40% EtOAc/hexanes + 1% AcOH) to give keto acid **18** (3.39 g, 100%). <sup>1</sup>H NMR (300 MHz, CDCl<sub>3</sub>) δ 8.07 (d, *J* = 6.9 Hz, 1H), 7.62 (d, *J* = 8.0 Hz, 2H), 7.50-7.16 (m, 10H), 5.54 (d, *J* = 11.8 Hz, 1H), 5.21 (d, *J* = 11.1 Hz, 1H), 4.87 (d, *J* = 6.2 Hz, 1H), 4.00 (13.4 Hz, 1H), 3.68 (s, 2H), 3.46 (s, 3H), 3.36-3.29 (m, 1H), 3.18 (d, *J* = 13.9 Hz, 1H), 2.48 (s, 3H), 1.41 (m, 2H); <sup>13</sup>C NMR (75 MHz, CDCl<sub>3</sub>) δ 201.6, 175.3, 171.1, 151.4, 144.3, 137.9, 135.4, 134.5, 132.2, 131.9, 129.9, 129.3, 129.1, 128.8, 128.2, 127.9, 125.5, 125.3, 123.7, 119.1, 116.6, 115.9, 68.9, 56.0, 52.4, 48.7, 45.2, 40.0, 30.0, 27.5, 21.6; LRMS-ES+ *m/z* (relative intensity) 633 (MH<sup>+</sup>, 100); HRMS-ES+ (C<sub>33</sub>H<sub>36</sub>N<sub>3</sub>O<sub>9</sub>S) calcd 650.2172 (M+NH<sub>4</sub><sup>+</sup>), found 650.2142.

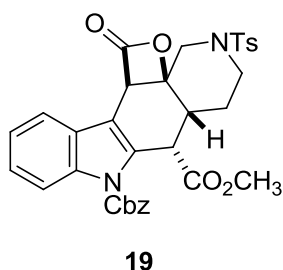

**Synthesis of β-Lactone 19.** To a stirred suspension of 4-PPY (1.09 g, 7.35 mmol), 2-bromo-*N*-propylpyridinium triflate (2.57 g, 7.35 mmol) and DIPEA (1.7 mL,

9.8 mmol) in CH<sub>2</sub>Cl<sub>2</sub> (79 mL) at rt was added a solution of keto acid **18** (3.00 g, 4.90 mmol) and glacial acetic acid (0.35 mL, 6.1 mmol) in CH<sub>2</sub>Cl<sub>2</sub> over 1 h *via* a syringe pump. The resultant orange solution was stirred for another 3 h at rt. Solvent was then removed *in vacuo* to give a residue which was purified by flash chromatography on silica gel (gradient, 30-40% EtOAc/hexanes) affording  $\beta$ -lactone **19** as an off white solid (2.71 g, 93%). FTIR (film) 1835 cm<sup>-1</sup>; <sup>1</sup>H NMR (400 MHz, CDCl<sub>3</sub>, ~97:3 mixture of diastereomers determined by <sup>1</sup>H NMR, only the major diastereomer peaks are reported)  $\delta$  8.02 (d, *J* = 7.2 Hz, 1H), 7.66 (d, *J* = 7.8 Hz, 2H), 7.60 (d, *J* = 7.4 Hz, 1H), 7.45 (m, 2H), 7.42-7.31 (m, 7H), 5.46 (d, *J* = 10.8 Hz, 1H), 5.32 (d, *J* = 12.0 Hz, 1H), 4.76 (s, 1H), 4.41 (d, *J* = 5.7 Hz, 1H), 3.88 (d, *J* = 12.0 Hz, 1H), 3.50 (m, 1H), 3.50 (s, 3H), 2.95 (d, *J* = 11.8 Hz, 1H), 2.55 (dd, *J* = 7.3, 14.5 Hz, 1H), 1.60 (m, 2H); <sup>13</sup>C NMR (75 MHz, CDCl<sub>3</sub>)  $\delta$  170.7, 165.4, 151.8, 144.5, 136.6, 134.5, 132.3, 130.1, 129.9, 129.0, 128.9, 128.8, 127.8, 126.9, 125.8, 123.8, 118.8, 115.6, 110.6, 75.6, 69.4, 53.0, 52.2, 50.9, 44.8, 43.3, 38.5, 25.1, 21.7; LRMS-ES+ *m/z* (relative intensity) 615 (MH<sup>+</sup>, 100). HRMS-ES+ (C<sub>33</sub>H<sub>34</sub>N<sub>3</sub>O<sub>8</sub>S) calcd 632.2067 (M+NH<sub>4</sub><sup>+</sup>), found 632.2053.

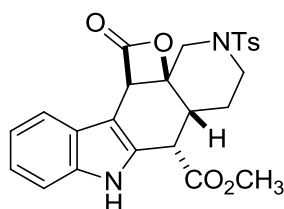

**20**

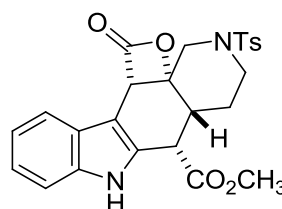

**21**

**Synthesis of NH-Indole Esters 20 and 21.** 10% Pd/C (0.54 g) was suspended in a solution of *N*-Cbz  $\beta$ -lactone **19** (2.71 g, 4.41 mmol) in EtOAc (280 mL). One drop

of glacial acetic acid was added to the mixture, followed by three evacuation-backfill cycles with hydrogen gas from a balloon. The reaction mixture was stirred under a balloon of H<sub>2</sub> for 1.5 h at rt. The mixture was filtered through a pad of Celite, concentrated and the residue was purified by flash chromatography on silica gel (gradient, 2 to 5% Et<sub>2</sub>O/CH<sub>2</sub>Cl<sub>2</sub>) to afford indole **20** (1.99 g, 94%) as a white solid. <sup>1</sup>H NMR (400 MHz, CDCl<sub>3</sub>) δ 9.50 (br s, 1H), 7.66 (d, *J* = 8.0 Hz, 2H), 7.62 (d, *J* = 7.6 Hz, 1H), 7.42 (d, *J* = 7.8 Hz, 1H), 7.36 (d, *J* = 8.0 Hz, 2H), 7.25-7.18 (m, 2H), 4.86 (s, 1H), 4.21 (d, *J* = 4.5 Hz, 1H), 4.09 (d, *J* = 11.6 Hz, 1H), 3.86 (s, 3H), 3.72 (dd, *J* = 2.0, 9.6 Hz, 1H), 2.78 (d, *J* = 11.6 Hz, 1H), 2.71 (ddd, *J* = 4.5, 12.6 Hz, 1H), 2.46 (s, 3H), 2.30 (td, *J* = 2.5, 12.0 Hz, 1H), 1.58 (m, 1H), 1.40 (qd, *J* = 4.5, 13.0 Hz, 1H); <sup>13</sup>C NMR (75 MHz, CDCl<sub>3</sub>) δ 171.5, 166.1, 144.5, 136.1, 132.6, 130.1, 129.1, 127.9, 125.7, 122.8, 120.7, 118.3, 111.7, 101.4, 53.6, 53.0, 51.7, 45.4, 39.5, 39.1, 24.5, 21.7; HRMS (*m/z*): [M + NH<sub>4</sub>]<sup>+</sup> calcd for C<sub>25</sub>H<sub>28</sub>N<sub>3</sub>O<sub>6</sub>S, 498.1693; found, 498.1663.

Indole **21** (65 mg, 3 %) was obtained as a white solid. <sup>1</sup>H NMR (300 MHz, DMSO-*d*<sub>6</sub>) δ 7.69 (d, *J* = 8.1 Hz, 2H), 7.61 (d, *J* = 7.8 Hz, 1H), 7.45 (d, *J* = 8.1 Hz, 2H), 7.40 (d, *J* = 8.0 Hz, 1H), 7.15 (dd, *J* = 7.1, 7.4 Hz, 1H), 7.08 (dd, *J* = 7.4, 7.5 Hz, 1H), 4.84 (s, 1H), 4.03-4.00 (m, 2H), 3.51 (br s, 4H), 2.94 (dd, *J* = 3.6, 12.6 Hz, 1H), 2.88 (d, *J* = 11.6 Hz, 1H), 2.46-2.43 (m, 1H), 2.41 (s, 3H), 1.95 (br d, *J* = 10.1 Hz, 1H), 1.08 (qd, *J* = 4.3, 12.9 Hz, 1H); <sup>13</sup>C NMR (75 MHz, DMSO-*d*<sub>6</sub>) δ 170.9, 166.9, 143.9, 136.2, 132.6, 130.0, 127.5, 125.4, 121.6, 119.3, 117.9, 111.5, 100.2, 76.8, 52.4, 52.1, 50.7, 44.8, 42.8, 38.8, 30.7, 28.7, 21.0; HRMS (*m/z*): [M + H]<sup>+</sup> calcd for C<sub>25</sub>H<sub>25</sub>N<sub>2</sub>O<sub>6</sub>S, 481.1428; found 481.1395.



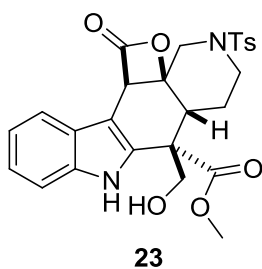

**Synthesis of  $\alpha$ -Hydroxymethyl Ester **23**.** To a solution of indole  $\beta$ -lactone **20** (255 mg, 0.531 mmol) in THF (25 mL) cooled to  $-78\text{ }^{\circ}\text{C}$  was added a solution of LiHMDS (1.0 M in THF, 1.60 mL, 1.60 mmol) dropwise with stirring. The resulting orange red solution was stirred at  $-78\text{ }^{\circ}\text{C}$  for another 30 min. A solution of freshly distilled monomeric formaldehyde<sup>15</sup> in THF ( $\sim 0.5\text{ M}$ , 10.6 mL, 5.3 mmol) was added dropwise. The resulting brownish red solution was stirred at  $-78\text{ }^{\circ}\text{C}$  for 5 min, then warmed to  $-40\text{ }^{\circ}\text{C}$  and stirred for another 15 min. The reaction mixture was then quenched at  $-40\text{ }^{\circ}\text{C}$  by addition of glacial acetic acid (0.10 mL, 1.6 mmol). The bright yellow solution was diluted with dichloromethane, quickly washed with ice cold water and dried over  $\text{Na}_2\text{SO}_4$ . After concentration of the solution, the residue was purified by column chromatography on silica gel (5%  $\text{Et}_2\text{O}/\text{CH}_2\text{Cl}_2$ , then 50%  $\text{EtOAc}/\text{hexanes}$ ) to afford  $\alpha$ -hydroxymethyl ester **23** as an off-white solid (160 mg, 59%). FT-IR (ATR) 3403, 1824  $\text{cm}^{-1}$ ;  $^1\text{H}$  NMR (400 MHz,  $\text{CDCl}_3$ )  $\delta$  9.43 (s, 1H, NH), 7.62-7.66 (m, 4H), 7.34-7.42 (m, 4H), 7.16-7.25 (m, 2H), 4.86 (s, 1H), 3.97-4.02 (m, 3H), 3.83 (s, 3H), 3.68 (app. d,  $J = 15.6\text{ Hz}$ , 1H), 2.74 (d,  $J = 15.7\text{ Hz}$ , 1H), 2.57 (dd,  $J = 6.4, 15.9\text{ Hz}$ , 1H), 2.46 (s, 3H), 2.26 (td,  $J = 4.2, 15.7\text{ Hz}$ , 1H), 2.13 (t,  $J = 8.2\text{ Hz}$ , 1H), 1.43-1.58 (m, 2H);  $^{13}\text{C}$  NMR (100 MHz,  $\text{CDCl}_3$ )  $\delta$  172.4, 167.1, 144.7, 136.6, 132.9, 131.6, 130.2, 128.0, 125.7, 123.2, 120.8, 118.6, 111.8, 101.0, 69.5, 55.4, 54.1, 53.1, 51.7, 45.3, 40.7, 26.8, 21.8. ESI MS ( $m/z$ ):  $[\text{M} + \text{H}]^+$  511.3; HRMS-ES ( $m/z$ ):

S17

$[M + H]^+$  calcd for  $C_{26}H_{27}N_2O_7S$ , 511.1539; found, 511.1538.

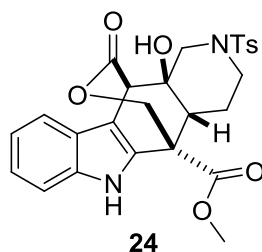

**Synthesis of  $\epsilon$ -Lactone **24**.** To a solution of  $\beta$ -lactone **23** (200 mg, 0.39 mmol) in dichloromethane (2.6 mL) at rt was added triethylamine (10.6 mL, excess). The resulting slightly yellow solution was stirred at rt for 2 h, evaporated to dryness and the residue was purified by flash column chromatography on silica gel (5%  $Et_2O/CH_2Cl_2$ , then 50%  $EtOAc$ /hexanes) to afford  $\epsilon$ -lactone **24** as an off white solid (65 mg, 33%). The recovered  $\beta$ -lactone **23** was subjected to another translactonization under the same conditions. After 2 runs, 40 mg of  $\beta$ -lactone **23** was recovered and  $\epsilon$ -lactone **24** was isolated as an off white foam (92 mg, BRSM, 58%). FT-IR (ATR) 3407, 1725  $cm^{-1}$ ;  $^1H$  NMR (400 MHz,  $CDCl_3$ )  $\delta$  9.61 (s, 1H, NH), 7.61 (d,  $J = 8.2$  Hz, 2H), 7.53 (d,  $J = 7.5$  Hz, 1H), 7.41 (d,  $J = 8.0$  Hz, 1H), 7.25 – 7.27 (m, 4H), 7.21 (t,  $J = 7.4$  Hz, 1H), 7.15 (t,  $J = 7.5$  Hz), 4.90 (d,  $J = 11.7$  Hz, 1H), 4.37 (d,  $J = 11.7$  Hz, 1H), 4.16 (s, 1H), 3.93 (s, 3H), 3.65 (br s, 1H), 3.58 (d,  $J = 13.5$  Hz, 1H), 3.52-3.58 (m, 1H), 3.01 (m, 1H), 2.81 (dd,  $J = 3.8, 13.6$  Hz, 1H), 2.59 (d,  $J = 13.6$  Hz, 1H), 2.37 (s, 3H), 1.40 (m, 1H), 0.76 (m, 1H);  $^{13}C$  NMR (100 MHz,  $CDCl_3$ )  $\delta$  171.0, 167.8, 144.2, 135.9, 134.4, 132.0, 130.2, 127.4, 124.9, 122.8, 120.9, 118.0, 113.7, 112.1, 107.0, 76.0, 73.6, 53.7, 53.0, 52.8, 52.2, 50.6, 42.4, 23.8, 21.7; ESI MS ( $m/z$ ):  $[M + H]^+$  511.3; HRMS ( $m/z$ ):  $[M + NH_4]^+$  calcd for  $C_{26}H_{30}N_3O_7S$ , 528.1799; found,

528.1797.

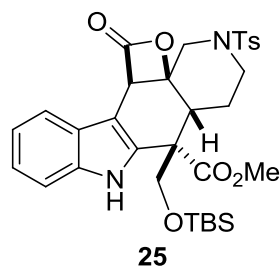

**Synthesis of *O*-TBS  $\beta$ -Lactone **25**.** To a solution of hydroxymethyl compound **23** (100 mg, 0.196 mmol) in  $\text{CH}_2\text{Cl}_2$  (15 mL) at 0 °C was added 2,6-lutidine (226  $\mu\text{L}$ , 1.95 mmol) and freshly distilled TBSOTf (225  $\mu\text{L}$ , 0.98 mmol) with stirring. The colorless reaction mixture was stirred at 0 °C and monitored by TLC. Once the reaction was complete (~40 min), the solvent was removed *in vacuo*. The residue was purified by flash chromatography on silica gel (gradient, 5% to 30% EtOAc/hexanes) to afford *O*-TBS ether **25** as a white foam (105 mg, 86%).  $^1\text{H}$  NMR (400 MHz,  $\text{CDCl}_3$ )  $\delta$  9.32 (br s, 1H, NH), 7.66-7.63 (m, 3H), 7.40 (d,  $J = 8.0$  Hz, 1H), 7.36 (d,  $J = 7.7$  Hz, 2H), 7.23 (m, 1H), 7.19 (dd,  $J = 7.5, 7.6$  Hz, 1H), 4.84 (s, 1H), 4.03 (d,  $J = 10.1$  Hz, 1H), 4.00 (d,  $J = 12.4$  Hz, 1H), 3.88 (d,  $J = 9.2$  Hz, 1H), 3.81 (s, 3H), 3.70 (m, 1H), 2.74 (d,  $J = 11.6$  Hz, 1H), 2.55 (dd,  $J = 4.7, 12.1$  Hz, 1H), 2.46 (s, 3H), 2.27 (td,  $J = 3.0, 11.8$  Hz, 1H), 1.55-1.47 (m, 2H), 0.80 (s, 9H), -0.17 (s, 3H), -0.33 (s, 3H);  $^{13}\text{C}$  NMR (75 MHz,  $\text{CDCl}_3$ )  $\delta$  172.5, 167.4, 144.8, 136.4, 132.7, 132.4, 130.4, 128.2, 125.7, 123.1, 120.7, 118.7, 111.7, 100.4, 70.3, 55.8, 54.4, 53.0, 51.9, 45.5, 41.3, 27.1, 26.1, 25.9, 22.0, 18.4, -5.6; HRMS ( $m/z$ ):  $[\text{M} + \text{H}]^+$  calcd for  $\text{C}_{32}\text{H}_{41}\text{N}_2\text{O}_7\text{SSi}$ , 625.2404; found 625.2390.

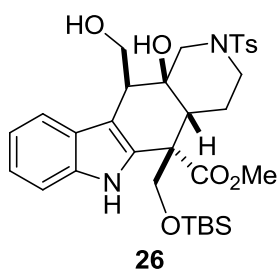

**Synthesis of Indole Diol Ester 26.** To a solution of *O*-TBS  $\beta$ -lactone **25** (120 mg, 0.193 mmol) in THF at rt was added  $\text{LiBH}_4$  (22 mg, 1.0 mmol). The reaction mixture was stirred at rt for 12 h, diluted with  $\text{NH}_4\text{Cl}_{(\text{aq})}$  and extracted with  $\text{CH}_2\text{Cl}_2$ . The extract was dried over  $\text{Na}_2\text{SO}_4$  and the solvent was removed *in vacuo* to give a residue which was purified by flash chromatography on silica gel (2% to 5%  $\text{Et}_2\text{O}/\text{CH}_2\text{Cl}_2$ ) affording diol **26** as a white solid (90 mg, 75%).  $^1\text{H}$  NMR (400 MHz,  $\text{CDCl}_3$ )  $\delta$  8.76 (br s, 1H), 7.69-7.66 (m, 3H), 7.39 (d,  $J = 7.9$  Hz, 1H), 7.34 (d,  $J = 7.7$  Hz, 2H), 7.22 (dd,  $J = 7.6, 7.8$  Hz, 1H), 7.14 (dd,  $J = 7.1, 7.4$  Hz, 1H), 4.87 (d,  $J = 12.2$  Hz, 1H), 4.44 (d,  $J = 12.9$  Hz, 1H), 4.23 (d,  $J = 8.7$  Hz, 1H), 4.08 (d,  $J = 9.5$  Hz, 2H), 3.71 (s, 3H), 3.67 (m, 1H), 2.45 (s, 3H), 2.25 (dd,  $J = 10.5, 10.8$  Hz, 1H), 2.17 (d,  $J = 11.8$  Hz, 1H), 1.92 (d,  $J = 12.2$  Hz, 1H), 1.59 (m, 1H), 1.40 (m, 1H), 0.87 (s, 9H), -0.05 (s, 3H), -0.11 (s, 3H);  $^{13}\text{C}$  NMR (75 MHz,  $\text{CDCl}_3$ )  $\delta$  173.4, 144.3, 137.0, 135.0, 133.2, 130.2, 128.1, 125.8, 122.3, 120.2, 119.2, 111.9, 103.8, 74.5, 71.8, 61.0, 55.8, 54.9, 52.5, 47.6, 46.1, 37.4, 26.4, 26.2, 22.0, 18.5, -5.2, -5.5; HRMS ( $m/z$ ):  $[\text{M} + \text{H}]^+$  calcd for  $\text{C}_{32}\text{H}_{45}\text{N}_2\text{O}_7\text{SSi}$ , 629.2717; found 629.2717.

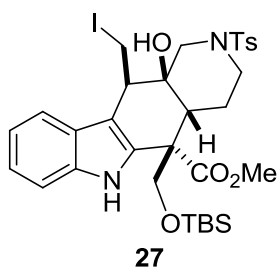

**Synthesis of Iodo Alcohol 27.** To a solution of  $\text{PPh}_3$  (229 mg, 0.87 mmol) and  $\text{I}_2$  (222 mg, 0.87 mmol) in  $\text{CH}_2\text{Cl}_2$  (9 mL) at rt was added imidazole (99 mg, 1.48 mmol). The resulting yellow suspension was stirred at rt for 10 min. A solution of diol **26** (122 mg, 0.195 mmol) in  $\text{CH}_2\text{Cl}_2$  (15 mL) was added dropwise, and the bright yellow suspension was stirred at rt for 5 h. The mixture was diluted with  $\text{CH}_2\text{Cl}_2$  and washed with 5%  $\text{Na}_2\text{S}_2\text{O}_3$ . The aqueous layer was extracted with  $\text{CH}_2\text{Cl}_2$ . The combined organic layers were washed with brine, dried over  $\text{Na}_2\text{SO}_4$ , and the solvent was removed *in vacuo*. The residue was purified by flash column chromatography on silica gel (2%  $\text{Et}_2\text{O}/\text{CH}_2\text{Cl}_2$ ) to afford iodo alcohol **27** as a white foamy solid (133 mg, 93%).  $^1\text{H}$  NMR (400 MHz,  $\text{CDCl}_3$ )  $\delta$  8.80 (br s, 1H), 7.67 (d,  $J = 8.1$  Hz, 2H), 7.63 (d,  $J = 7.7$  Hz, 1H), 7.37-7.33 (m, 3H), 7.20 (dd,  $J = 7.1, 7.5$  Hz, 1H), 7.14 (dd,  $J = 7.4, 7.4$  Hz, 1H), 4.17-4.09 (m, 2H), 4.00-3.96 (m, 1H), 3.90-3.88 (m, 2H), 3.68 (s, 3H), 3.30 (s, 1H), 2.44 (s, 3H), 2.30 (m, 1H), 2.18 (m, 1H), 2.08 (dd,  $J = 3.1, 11.5$  Hz, 1H), 1.63 (m, 1H), 1.43 (m, 1H), 0.84 (s, 9H), -0.08 (s, 3H), -0.10 (s, 3H);  $^{13}\text{C}$  NMR (75 MHz,  $\text{CDCl}_3$ )  $\delta$  172.9, 144.0, 136.5, 132.7, 132.3, 132.1, 129.9, 128.7, 127.9, 126.0, 122.0, 119.6, 111.4, 108.9, 72.9, 71.0, 54.8, 54.3, 52.3, 45.6, 36.4, 25.8, 21.6, 18.2, 4.8, 1.1, -5.6, -5.7; HRMS ( $m/z$ ):  $[\text{M} + \text{H}]^+$  calcd for  $\text{C}_{32}\text{H}_{44}\text{IN}_2\text{O}_6\text{SSi}$ , 739.1734; found, 739.1764.

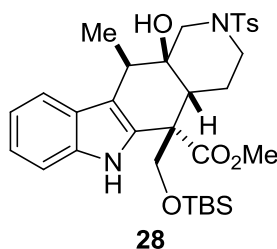

**Synthesis of Methyl Compound 28.** 10% Pd/C (158 mg) was suspended in a stirred solution of iodide **27** (29 mg, 0.039 mmol) in *t*-BuOH/EtOAc (1:1 v/v, 30 mL). The reaction mixture was evacuated and backfilled with H<sub>2</sub> three times from a balloon and stirred under a H<sub>2</sub> atmosphere at rt. After 3.5 h, the reaction was evacuated and back filled with argon, and another portion of 10% Pd/C (32 mg) was added and the reaction mixture was stirred under H<sub>2</sub> at rt for another 12 h. The Pd/C was filtered off through a pad of Celite, and the solvent was removed *in vacuo* to afford a yellow foamy solid. This material was purified by flash column chromatography on silica gel (CH<sub>2</sub>Cl<sub>2</sub>, then 2% Et<sub>2</sub>O/CH<sub>2</sub>Cl<sub>2</sub>) to afford methyl compound **28** as a white solid (23 mg, 96%). <sup>1</sup>H NMR (400 MHz, CDCl<sub>3</sub>) δ 8.51 (br s, 1H), 7.72 (d, *J* = 7.9 Hz, 1H), 7.67 (d, *J* = 8.1 Hz, 2H), 7.34-7.32 (m, 3H), 7.17 (dd, *J* = 7.1, 7.6 Hz, 1H), 7.08 (dd, *J* = 7.2, 7.4 Hz, 1H), 4.13 (d, *J* = 9.4 Hz, 1H), 4.00 (d, *J* = 9.4 Hz, 1H), 3.96 (d, *J* = 11.8 Hz, 1H), 3.72 (s, 3H), 3.66 (q, *J* = 7.0 Hz, 1H), 3.09 (s, 1H), 2.45 (s, 3H), 2.26 (t, *J* = 10.4 Hz, 1H), 2.04 (d, *J* = 13.0 Hz, 1H), 2.00 (dd, *J* = 3.7, 12.6 Hz, 1H), 1.63 (qd, *J* = 4.4, 12.9 Hz, 1H), 1.57 (d, *J* = 6.9 Hz, 3H), 0.80 (s, 3H), -0.07 (s, 3H), -0.12 (s, 3H); <sup>13</sup>C NMR (75 MHz, CDCl<sub>3</sub>) δ 173.3, 143.9, 137.1, 133.0, 130.0, 129.9, 129.8, 127.9, 126.7, 121.7, 120.5, 119.1, 111.4, 111.2, 72.5, 70.7, 55.1, 53.4, 52.3, 48.2, 46.0, 30.5, 26.5, 25.8, 25.7, 21.7, 18.1, 12.8, -5.7, -5.8; HRMS (*m/z*): [M + H]<sup>+</sup> calcd for C<sub>32</sub>H<sub>45</sub>N<sub>2</sub>O<sub>6</sub>SSi, 613.2768; found, 613.2772.

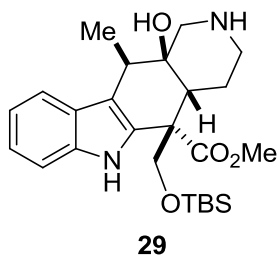

**Synthesis of Piperidine 29.** Magnesium turnings (399 mg, excess) were added to a solution of compound **28** (21.6 mg, 0.035 mmol) in anhydrous methanol, and the mixture was sonicated at rt until all the magnesium turnings dissolved (~45 min). The reaction mixture was then poured into  $\text{NH}_4\text{Cl}_{(\text{aq})}$  at 0 °C, and extracted with  $\text{CHCl}_3$ . The organic extract was dried over  $\text{Na}_2\text{SO}_4$ , and evaporated to dryness *in vacuo* to give a white foamy solid. This material was purified by flash chromatography on silica gel (2% to 5%  $\text{MeOH}/\text{CHCl}_3$ , then 1%  $\text{NEt}_3$  in 5%  $\text{MeOH}/\text{CHCl}_3$ ) to afford piperidine **29** as a white solid (15.6 mg, 96%).  $^1\text{H}$  NMR (400 MHz,  $\text{CD}_3\text{OD}$ )  $\delta$  7.90 (br s, 1H), 7.66 (d,  $J = 7.8$  Hz, 1H), 7.33 (d,  $J = 8.0$  Hz, 1H), 7.08 (dd,  $J = 7.2, 7.4$  Hz, 1H), 6.98 (dd,  $J = 7.2, 7.3$  Hz, 1H), 4.34 (d,  $J = 9.3$  Hz, 1H), 4.20 (d,  $J = 9.4$  Hz, 1H), 3.77 (s, 3H), 3.42 (q,  $J = 6.7$  Hz, 1H), 3.28 (m, 1H), 3.03 (q,  $J = 7.2$  Hz, 1H), 2.94 (br d,  $J = 12.6$  Hz, 1H), 2.69 (m, 1H), 2.50 (d,  $J = 12.7$  Hz, 1H), 2.29 (m, 1H), 1.49 (d,  $J = 6.7$  Hz, 3H), 0.83 (s, 9H), -0.02 (s, 3H), -0.10 (s, 3H);  $^{13}\text{C}$  NMR (75 MHz,  $\text{CD}_3\text{OD}$ )  $\delta$  175.1, 138.6, 131.7, 127.9, 122.2, 120.8, 119.4, 112.7, 112.0, 79.6, 72.4, 71.6, 56.9, 54.0, 52.7, 47.8, 45.4, 32.1, 26.4, 19.2, 14.5, -5.4, -5.5; HRMS ( $m/z$ ):  $[\text{M} + \text{H}]^+$  calcd for  $\text{C}_{25}\text{H}_{39}\text{N}_2\text{O}_4\text{Si}$ , 459.2674; found, 459.2676.

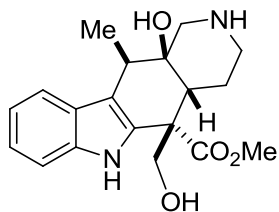

(±)-**3**

**Synthesis of (±)-Alstilobanine A (3).** A solution of *O*-TBS indole **29** (16.5 mg, 0.036 mmol) in CHCl<sub>3</sub> (3.3 mL) at 0 °C was treated with a solution of hydrogen chloride in MeOH (1.25 M, 3.3 mL). The resultant colorless solution was stirred at rt for 2 h, and the volatiles were removed under high vacuum to afford (±)-alstilobanine A (**3**) hydrochloride salt as a white solid (12.2 mg, 100%). <sup>1</sup>H NMR (400 MHz, CD<sub>3</sub>OD) δ 7.55 (d, *J* = 7.9 Hz, 1H), 7.34 (d, *J* = 8.0 Hz, 1H), 7.08 (dd, *J* = 7.4, 7.5 Hz, 1H), 6.98 (dd, *J* = 7.4, 7.5 Hz, 1H), 4.14 (d, *J* = 10.9 Hz, 1H), 4.04 (d, *J* = 10.8 Hz, 1H), 3.78 (s, 3H), 3.54 (d, *J* = 12.5 Hz, 1H), 3.26 (q, *J* = 7.1 Hz, 1H), 3.09 (m, 1H), 2.93 (m, 1H), 2.87 (d, *J* = 12.6 Hz, 1H), 2.52 (m, 1H), 2.06 (m, 1H), 1.87 (m, 1H), 1.43 (d, *J* = 6.7 Hz, 3H); <sup>13</sup>C NMR (75 MHz, CD<sub>3</sub>OD) δ 174.9, 138.9, 130.9, 127.2, 122.5, 119.6, 119.5, 113.3, 112.2, 71.0, 68.7, 55.2, 53.0, 50.5, 42.4 (2C), 34.4, 22.6, 15.7; HRMS (*m/z*): [M + H]<sup>+</sup> calcd for C<sub>19</sub>H<sub>25</sub>N<sub>2</sub>O<sub>4</sub>, 345.1809; found, 345.1809.



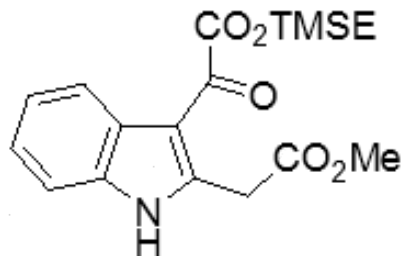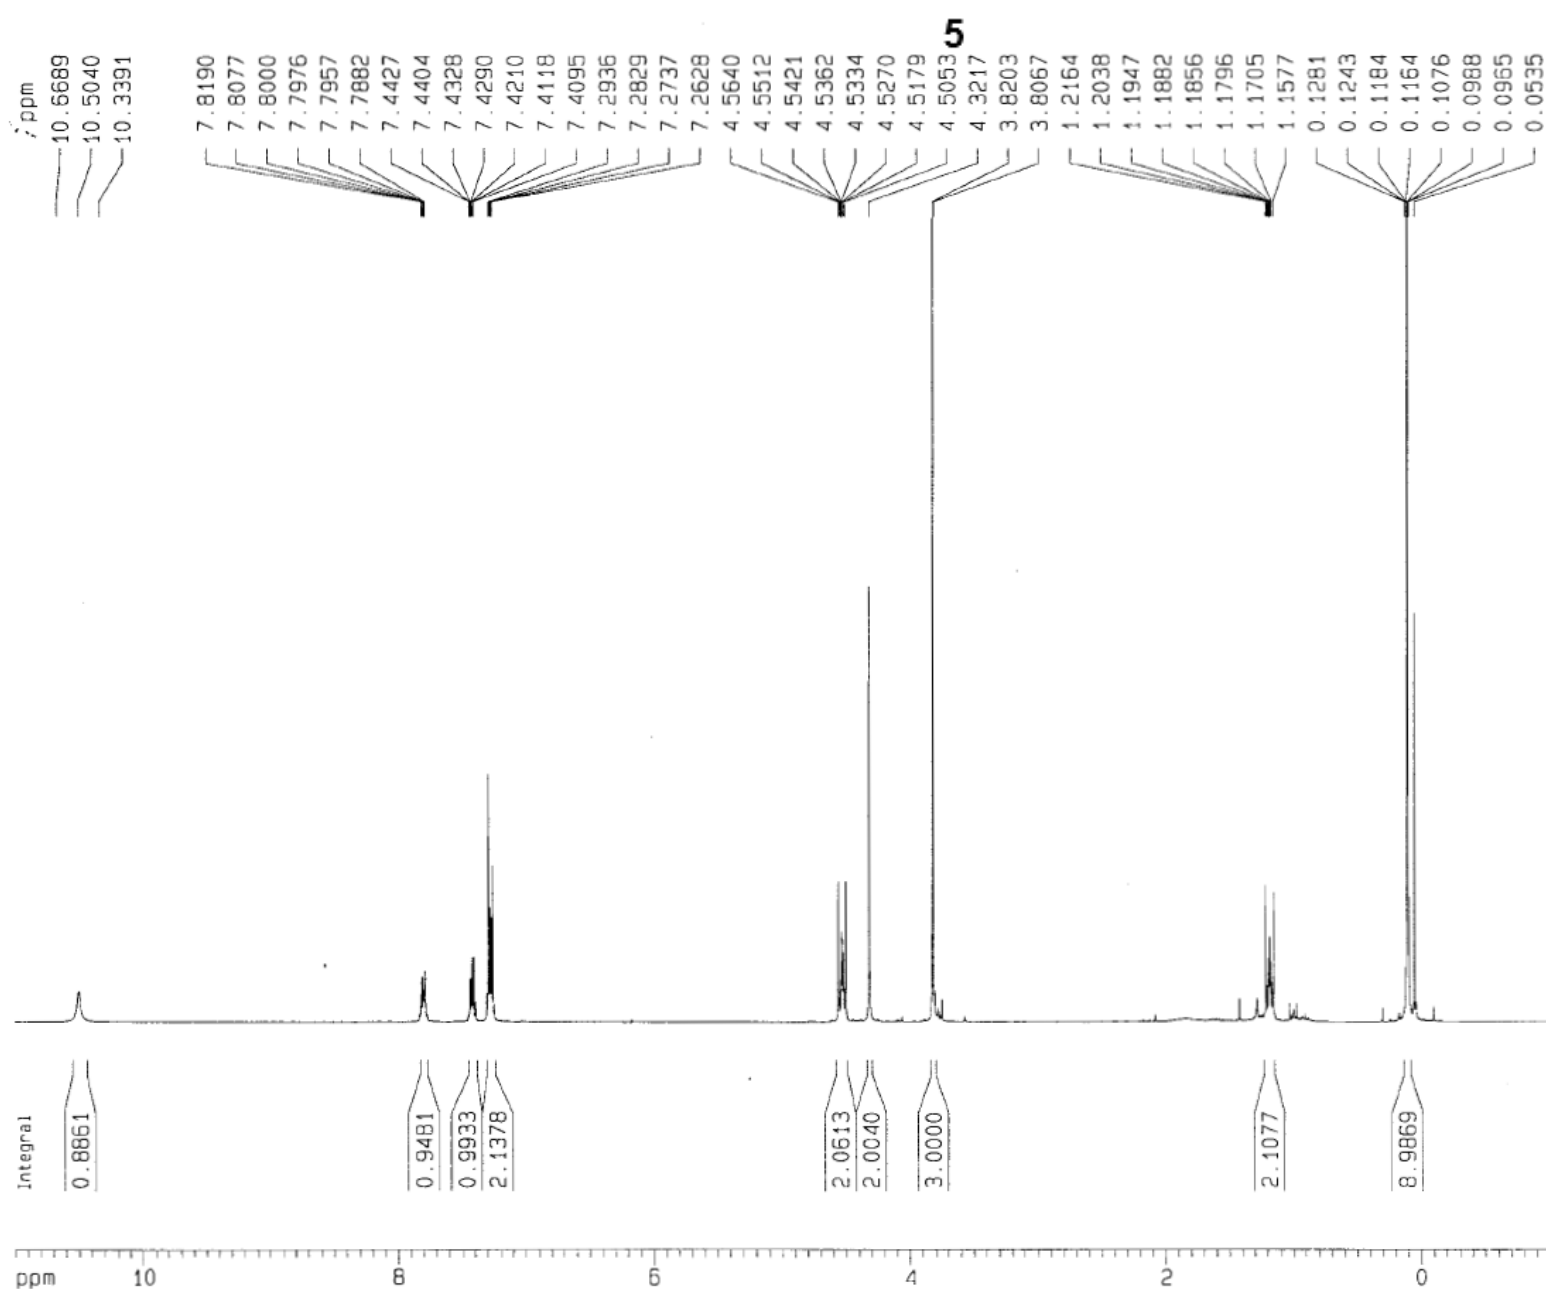

Current Data Parameters  
 NAME 093009mm4170  
 EXPNO 1  
 PROCNO 1

F2 - Acquisition Parameters  
 Date\_ 20090930  
 Time 16.33  
 INSTRUM spect  
 PROBHD 5 mm GNP 1H/1  
 PULPROG zg30  
 TD 24690  
 SOLVENT CDCl3  
 NS 16  
 DS 2  
 SWH 6172.839 Hz  
 FIDRES 0.250014 Hz  
 AQ 1.9999400 sec  
 RG 143.7  
 DW 81.000 usec  
 DE 6.00 usec  
 TE 300.0 K  
 D1 1.00000000 sec

----- CHANNEL f1 -----  
 NUC1 1H  
 P1 11.70 usec  
 PL1 0.00 dB  
 SFO1 299.8718518 MHz

F2 - Processing parameters  
 SI 32768  
 SF 299.8700000 MHz  
 WDW no  
 SSB 0  
 LB 0.00 Hz  
 GB 0  
 PC 1.00

1D NMR plot parameters  
 CX 20.00 cm  
 F1P 11.000 ppm  
 F1 3298.57 Hz  
 F2P -1.000 ppm  
 F2 -299.87 Hz  
 PPMCM 0.60000 ppm/cm  
 HZCM 179.92200 Hz/cm

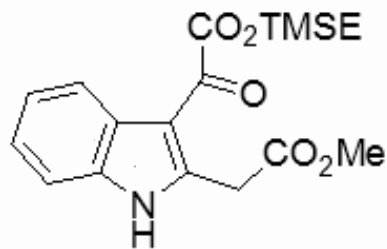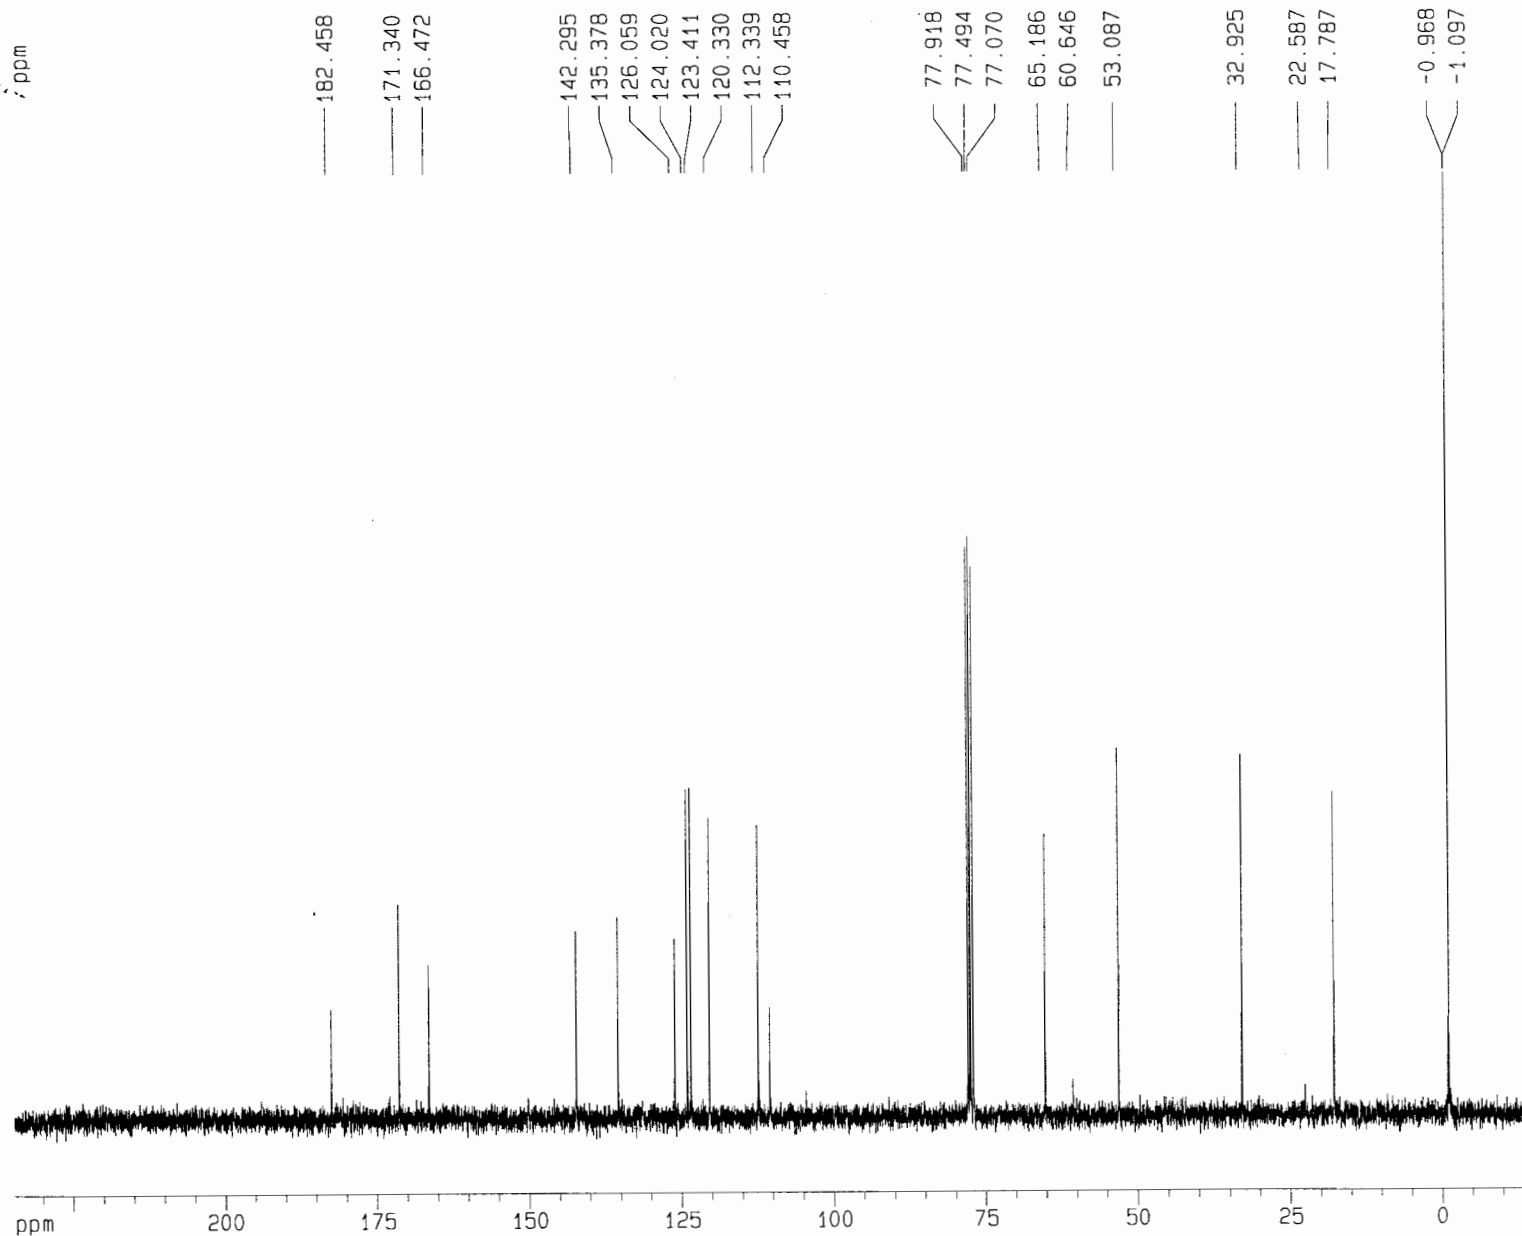

Current Data Parameters  
 NAME 093009mm4170  
 EXPNO 2  
 PROCNO 1

F2 - Acquisition Parameters  
 Date\_ 20090930  
 Time 16.44  
 INSTRUM spect  
 PROBHD 5 mm QNP 1H/1  
 PULPROG zgpg30  
 TD 32768  
 SOLVENT CDCl3  
 NS 172  
 DS 4  
 SWH 18796.992 Hz  
 FIDRES 0.573639 Hz  
 AQ 0.8716788 sec  
 RG 2048  
 DW 26.600 usec  
 DE 6.00 usec  
 TE 300.0 K  
 D1 2.0000000 sec  
 D11 0.0300000 sec  
 D12 0.0000200 sec

==== CHANNEL f1 =====  
 NUC1 13C  
 P1 5.40 usec  
 PL1 -6.00 dB  
 SF01 75.4106357 MHz

==== CHANNEL f2 =====  
 CPDPRG2 waltz16  
 NUC2 1H  
 PCPD2 115.00 usec  
 PL2 0.00 dB  
 PL12 20.00 dB  
 PL13 20.00 dB  
 SF02 299.8711995 MHz

F2 - Processing parameters  
 SI 32768  
 SF 75.4023410 MHz  
 WDW EM  
 SSB 0  
 LB 1.00 Hz  
 GB 0  
 PC 1.40

1D NMR plot parameters  
 CX 20.00 cm  
 F1P 234.651 ppm  
 F1 17693.24 Hz  
 F2P -14.638 ppm  
 F2 -1103.75 Hz  
 PPMCM 12.46446 ppm/cm  
 HZCM 939.84955 Hz/cm



## Diastereomeric products mixture of the Nitrosoalkene Michael addition

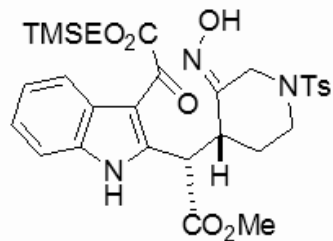

11a

+

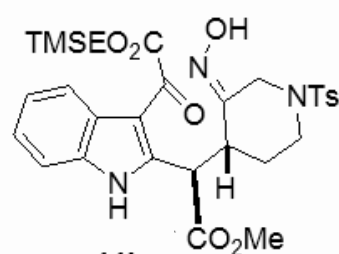

11b

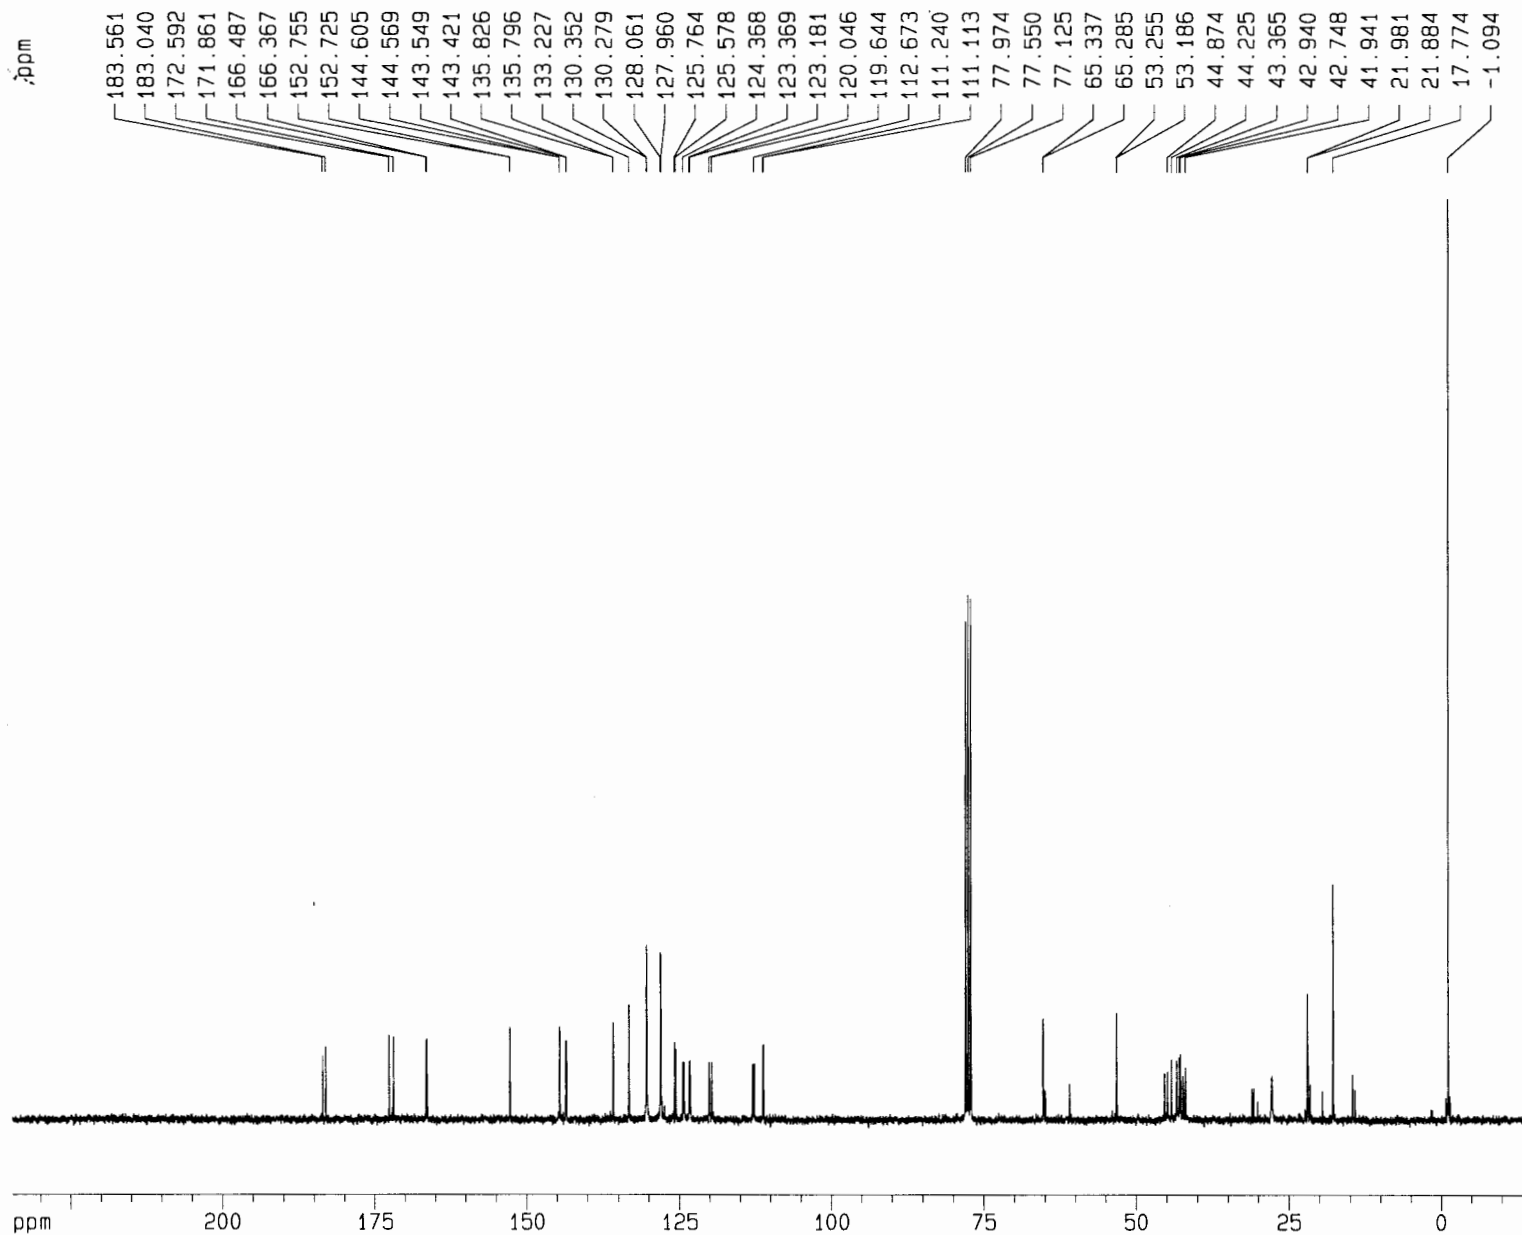

Current Data Parameters  
NAME 012610mm42B1  
EXPNO 2  
PROCNO 1

F2 - Acquisition Parameters  
Date\_ 20100126  
Time 9.40  
INSTRUM spect  
PROBHD 5 mm GNP 1H/1  
PULPROG zgpg30  
TD 32768  
SOLVENT CDCl3  
NS 1024  
DS 4  
SWH 18796.992 Hz  
FIDRES 0.573639 Hz  
AQ 0.8716788 sec  
RG 512  
DW 26.600 usec  
DE 6.00 usec  
TE 300.0 K  
D1 2.0000000 sec  
D11 0.0300000 sec  
D12 0.0002000 sec

===== CHANNEL f1 =====  
NUC1 13C  
P1 5.40 usec  
PL1 -6.00 dB  
SF01 75.4106357 MHz

===== CHANNEL f2 =====  
CPDPRG2 waltz16  
NUC2 1H  
PCPD2 115.00 usec  
PL2 0.00 dB  
PL12 20.00 dB  
PL13 20.00 dB  
SF02 299.8711995 MHz

F2 - Processing parameters  
SI 32768  
SF 75.4023410 MHz  
WDW EM  
SSB 0  
LB 1.00 Hz  
GB 0  
PC 1.40

1D NMR plot parameters  
CX 20.00 cm  
F1P 234.651 ppm  
F1 17693.24 Hz  
F2P -14.638 ppm  
F2 -1103.75 Hz  
PPMCM 12.46446 ppm/cm  
HZCM 939.84967 Hz/cm

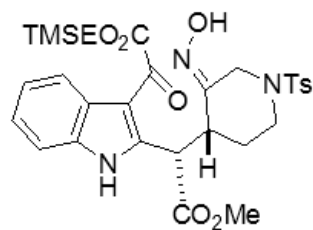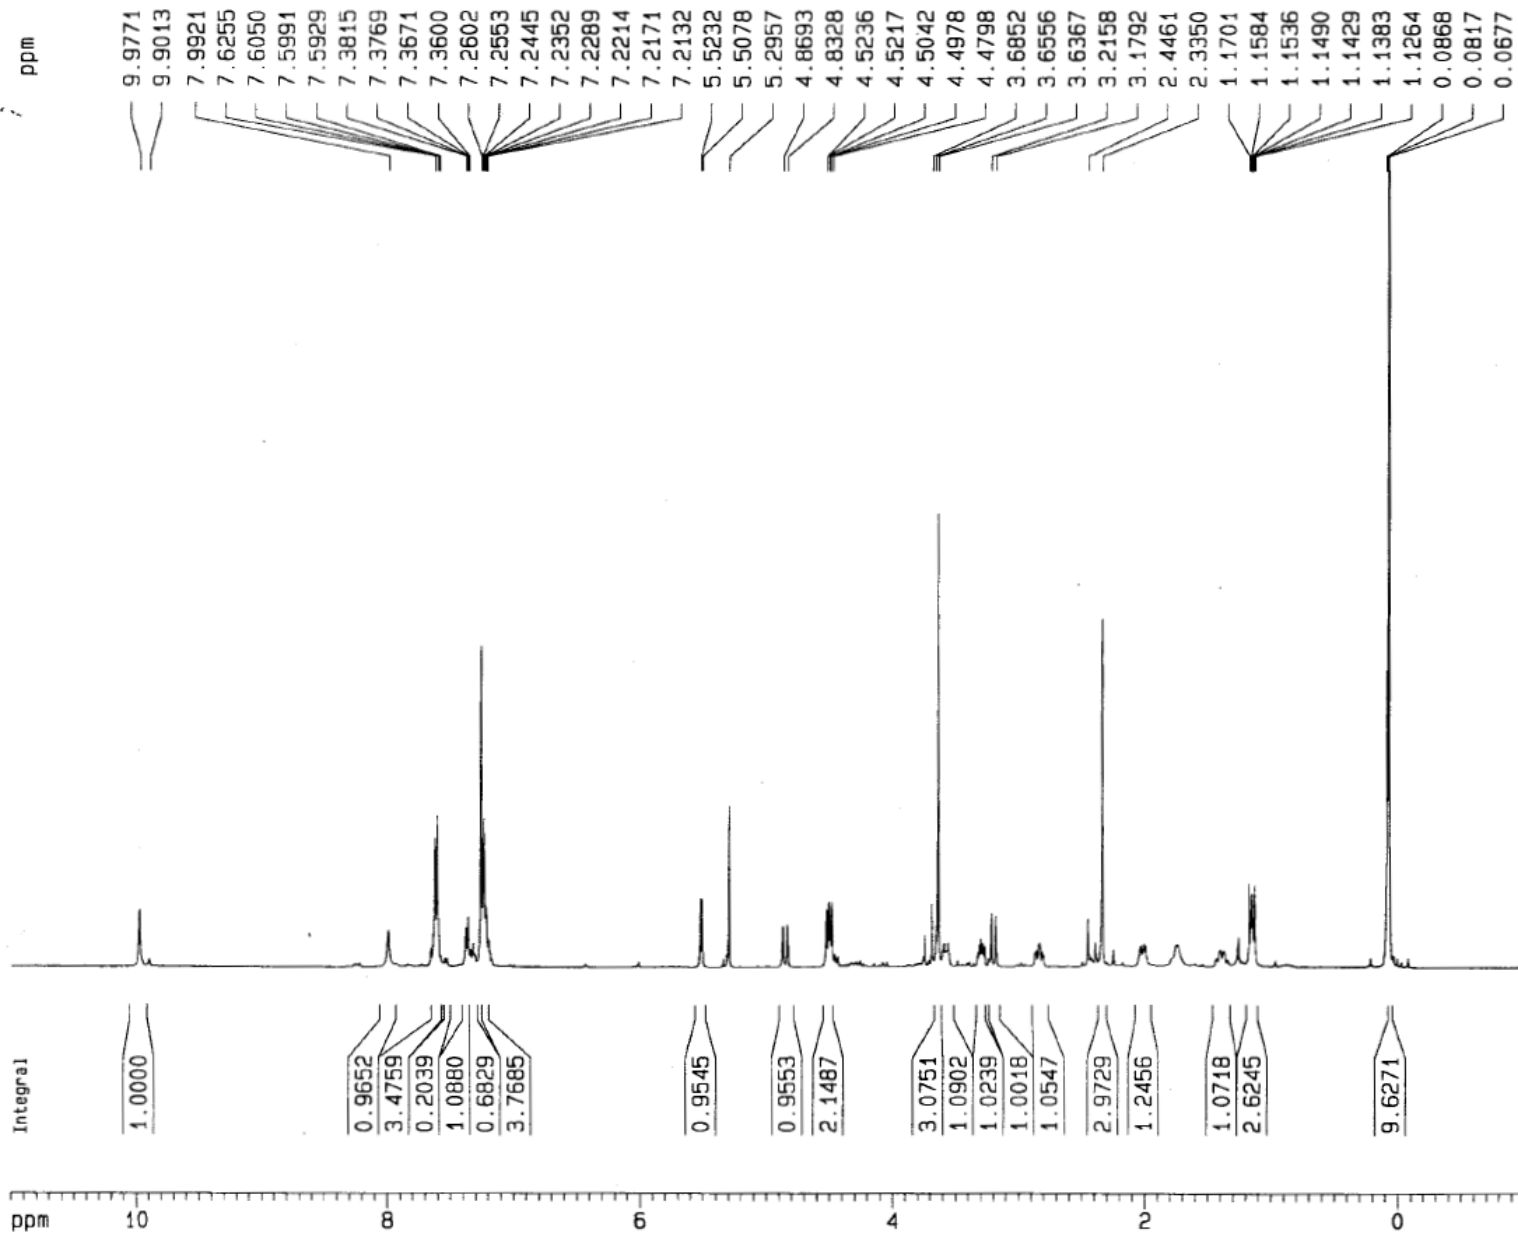

Current Data Parameters  
 NAME 092612FYG-11a  
 EXPNO 1  
 PROCNO 1

F2 - Acquisition Parameters  
 Date\_ 20120926  
 Time 9.02  
 INSTRUM spect  
 PROBHD 5 mm BBI 1H-  
 PULPROG zg30  
 TD 65536  
 SOLVENT CDCl3  
 NS 16  
 DS 2  
 SWH 8278.146 Hz  
 FIDRES 0.126314 Hz  
 AQ 3.9584243 sec  
 RG 322.5  
 DW 60.400 usec  
 DE 6.00 usec  
 TE 300.0 K  
 D1 1.00000000 sec

===== CHANNEL f1 =====  
 NUC1 1H  
 P1 6.45 usec  
 PL1 0.00 dB  
 SFO1 400.1324710 MHz

F2 - Processing parameters  
 SI 32768  
 SF 400.1300089 MHz  
 WDW EM  
 SSB 0  
 LB 0.30 Hz  
 GB 0  
 PC 1.00

1D NMR plot parameters  
 CX 20.00 cm  
 F1P 11.000 ppm  
 F1 4401.43 Hz  
 F2P -1.000 ppm  
 F2 -400.13 Hz  
 PPMCM 0.60000 ppm/cm  
 HZCM 240.07800 Hz/cm

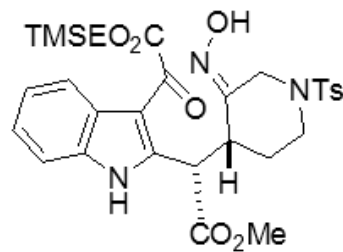

11a

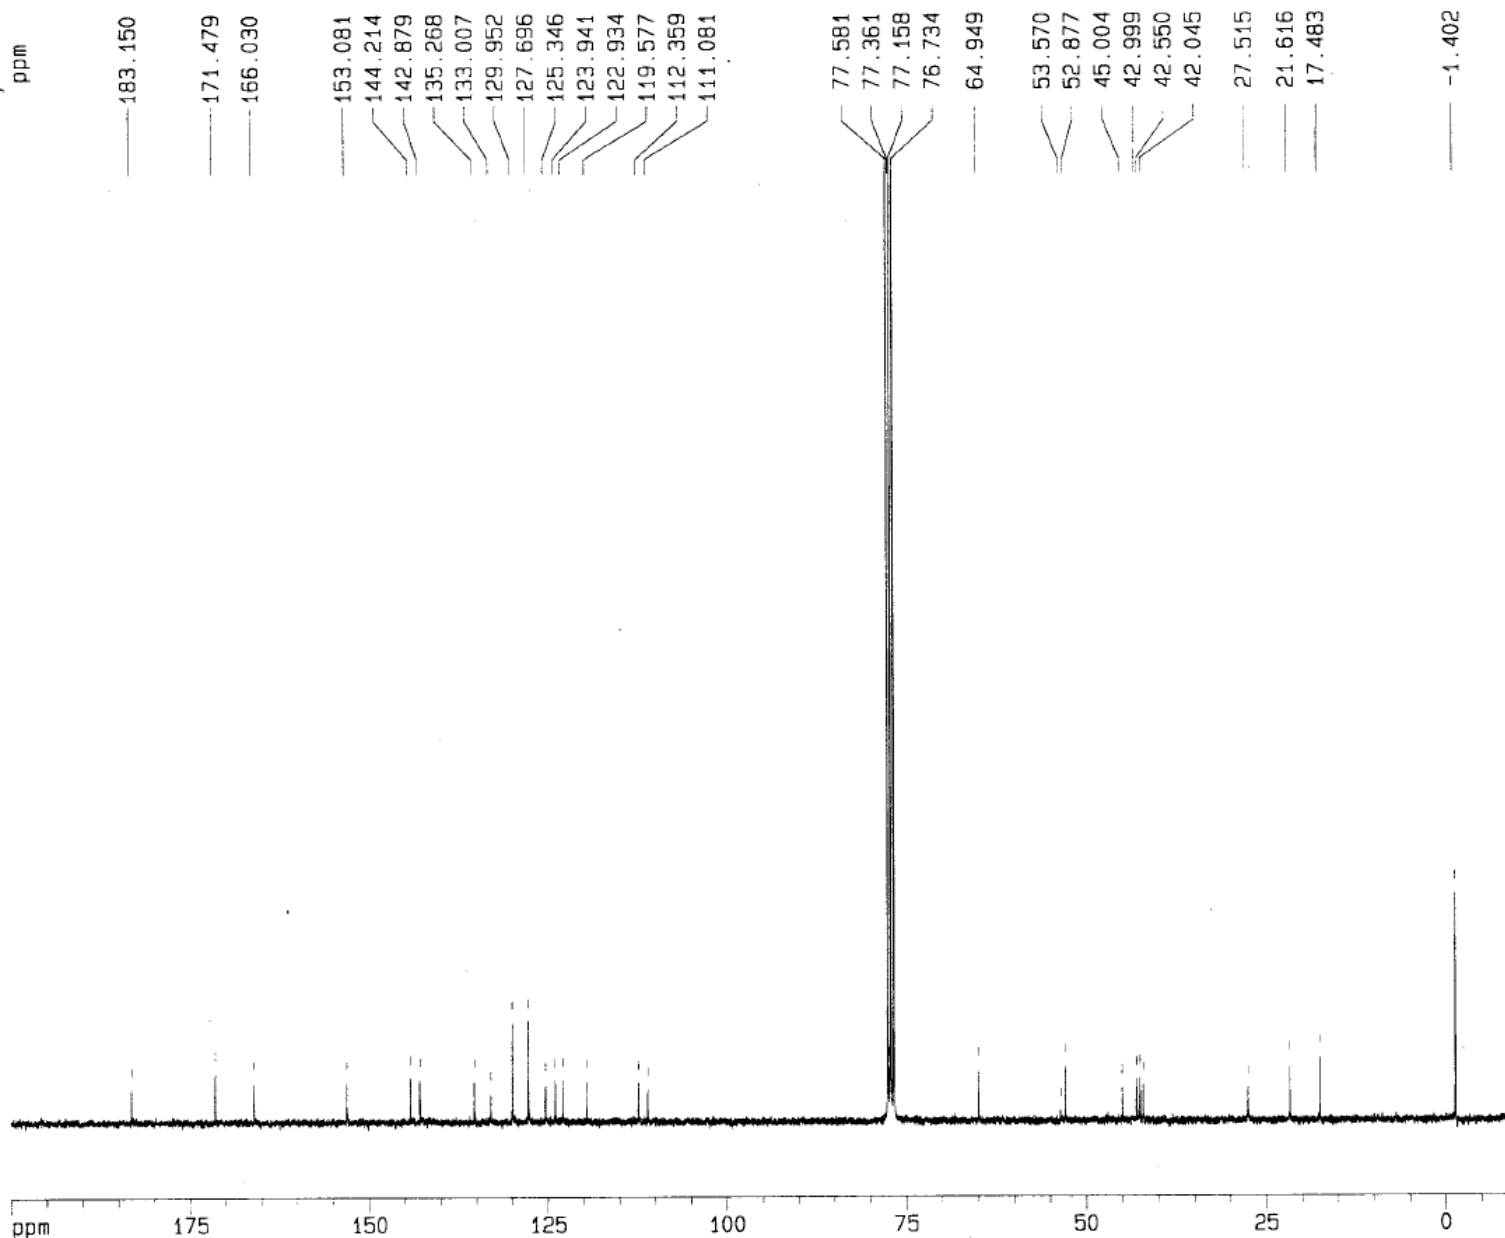

## Current Data Parameters

NAME 092512FYG-11a  
 EXPNO 2  
 PROCNO 1

## F2 - Acquisition Parameters

Date\_ 20120925  
 Time 18.45  
 INSTRUM spect  
 PROBHD 5 mm Multinu  
 PULPROG zgpg30  
 TD 65536  
 SOLVENT CDC13  
 NS 3930  
 DS 4  
 SWH 18832.393 Hz  
 FIDRES 0.287360 Hz  
 AQ 1.7400308 sec  
 RG 16384  
 DW 26.550 usec  
 DE 6.00 usec  
 TE 300.0 K  
 D1 2.0000000 sec  
 d11 0.0300000 sec  
 d12 0.0000200 sec

===== CHANNEL f1 =====  
 NUC1 13C  
 P1 9.75 usec  
 PL1 0.00 dB  
 SF01 75.4760200 MHz

===== CHANNEL f2 =====  
 CPDPRG2 waltz16  
 NUC2 1H  
 PCPD2 110.00 usec  
 PL2 0.00 dB  
 PL12 17.50 dB  
 PL13 17.50 dB  
 SF02 300.1312005 MHz

## F2 - Processing parameters

S1 32768  
 SF 75.4677399 MHz  
 WDM EM  
 SSB 0  
 LB 1.00 Hz  
 GB 0  
 PC 1.40

## 1D NMR plot parameters

CX 20.00 cm  
 F1P 200.000 ppm  
 F1 15093.55 Hz  
 F2P -10.000 ppm  
 F2 -754.68 Hz  
 PPMCM 10.50000 ppm/cm  
 HZCM 792.41132 Hz/cm

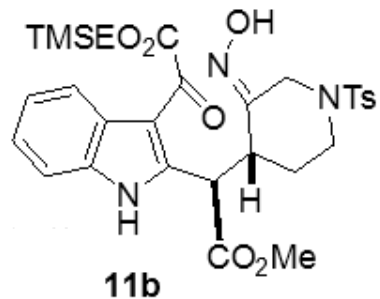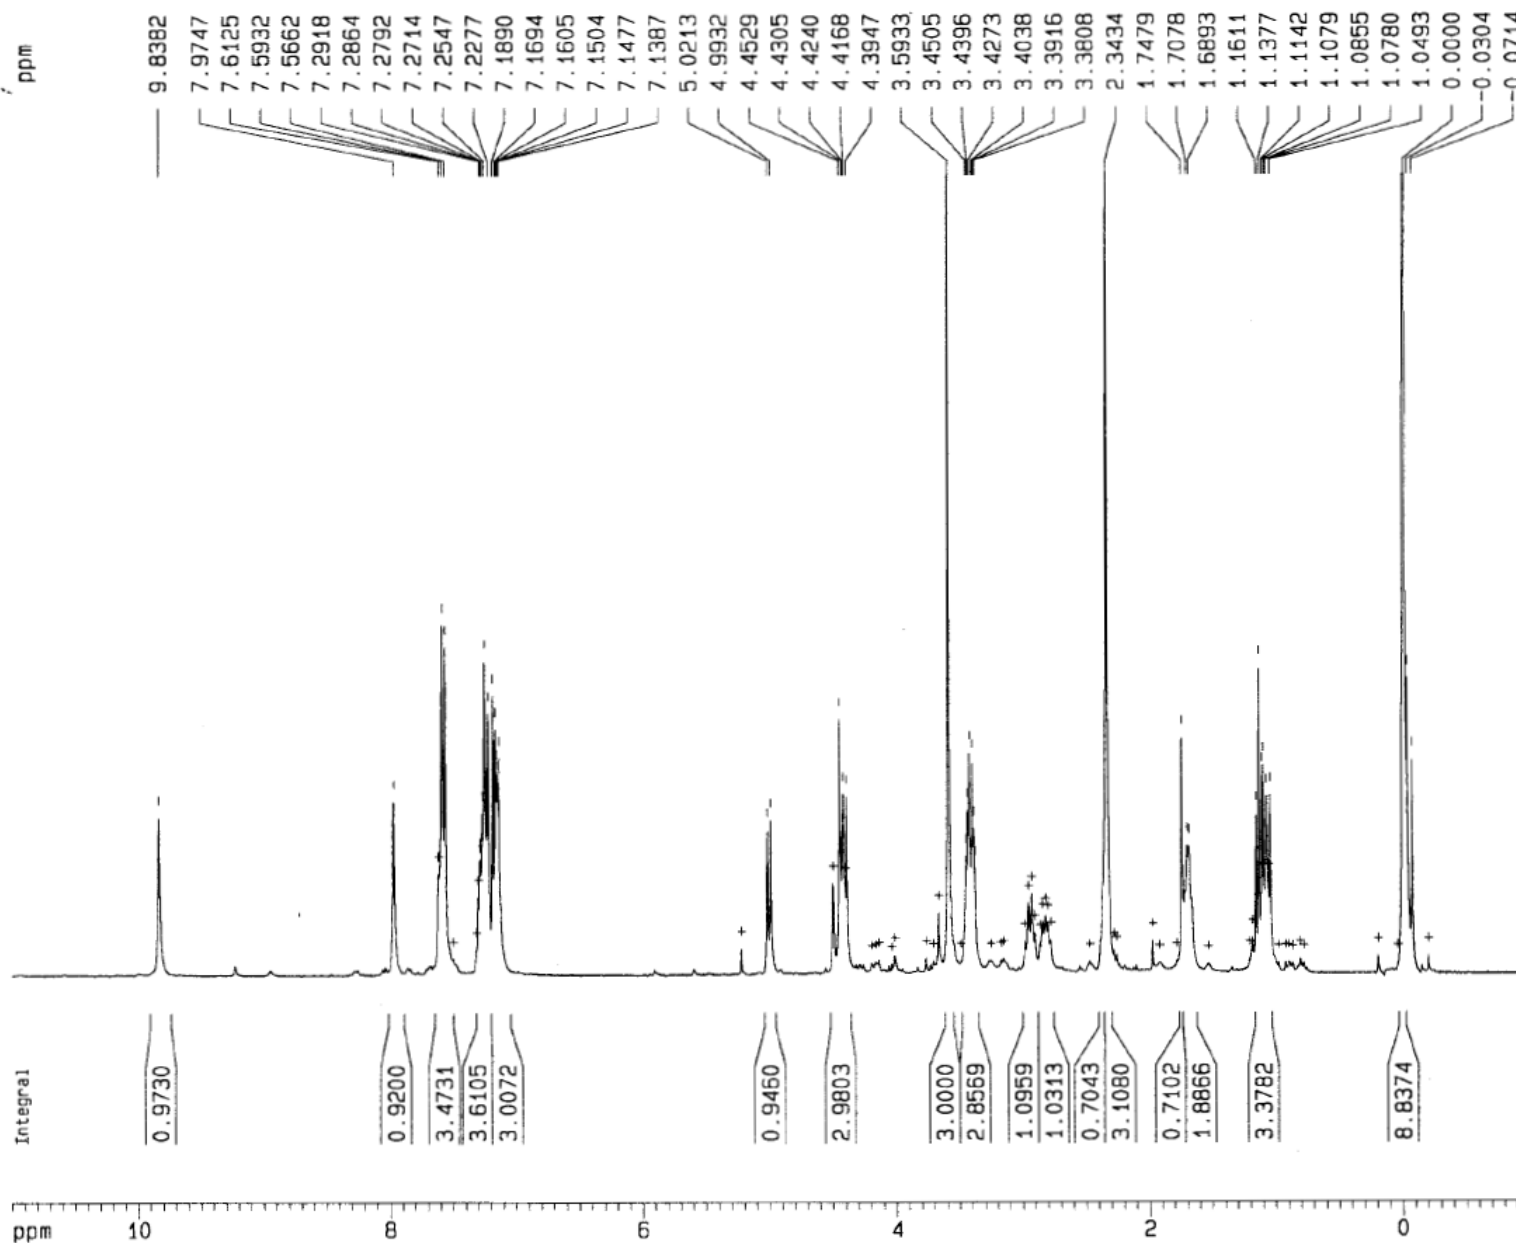

Current Data Parameters  
 NAME 033111FYQI-NAM  
 EXPNO 2  
 PROCNO 1

F2 - Acquisition Parameters  
 Date\_ 20110331  
 Time 15.24  
 INSTRUM spect  
 PROBHD 5 mm Multinu  
 PULPROG zg30  
 TD 65536  
 SOLVENT CDC13  
 NS 16  
 DS 2  
 SWH 6172.839 Hz  
 FIDRES 0.094190 Hz  
 AQ 5.3084660 sec  
 RG 322.5  
 DW 81.000 usec  
 DE 6.00 usec  
 TE 300.0 K  
 D1 1.00000000 sec

===== CHANNEL f1 =====  
 NUC1 1H  
 P1 9.60 usec  
 PL1 -6.00 dB  
 SF01 300.1318534 MHz

F2 - Processing parameters  
 SI 32768  
 SF 300.1300277 MHz  
 WDW EM  
 SSB 0  
 LB 0.30 Hz  
 GB 0  
 PC 1.00

1D NMR plot parameters  
 CX 20.00 cm  
 F1P 11.000 ppm  
 F1 3301.43 Hz  
 F2P -1.000 ppm  
 F2 -300.13 Hz  
 PPMCM 0.60000 ppm/cm  
 HZCM 180.07802 Hz/cm

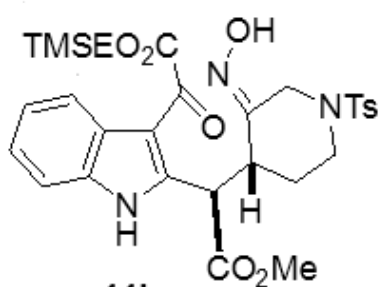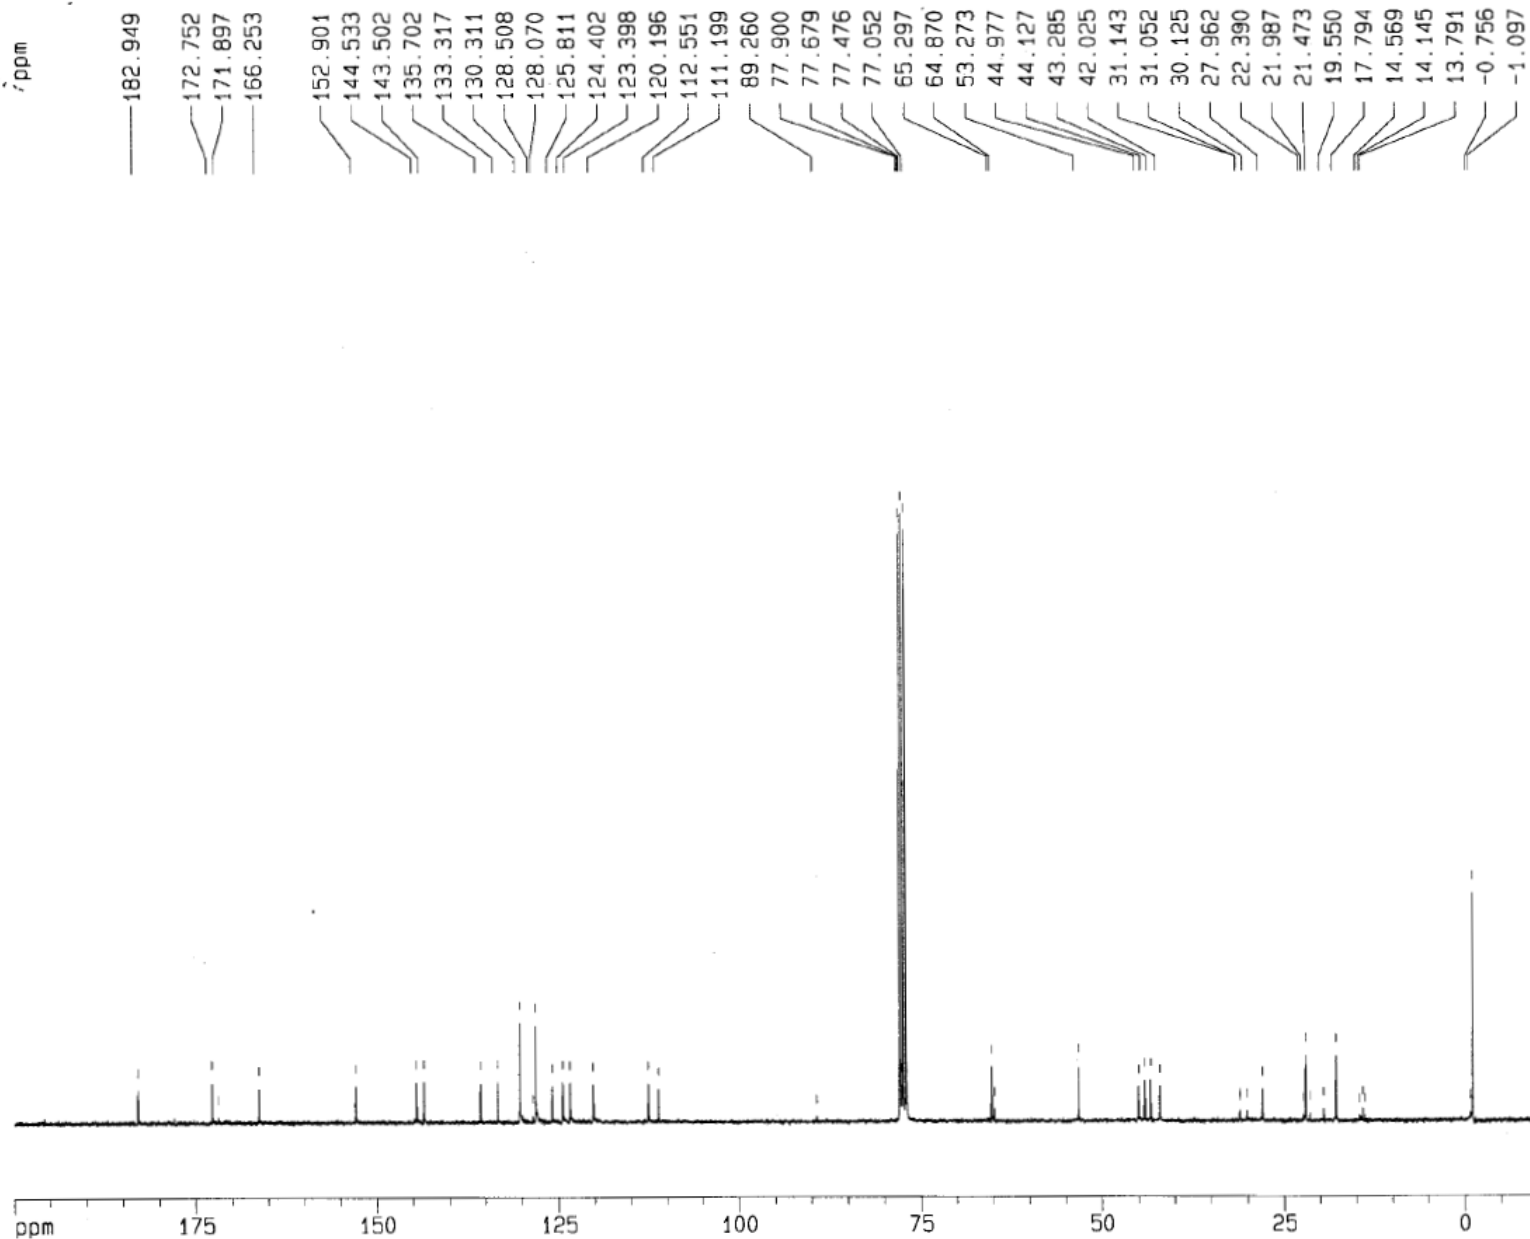

## Current Data Parameters

NAME 092412FYG-11b  
EXPNO 2  
PROCNO 1

## F2 - Acquisition Parameters

Date\_ 20120924  
Time 23.14  
INSTRUM spect  
PROBHD 5 mm QNP 1H/1  
PULPROG zgpg30  
TD 65536  
SOLVENT CDCl3  
NS 3584  
DS 4  
SWH 18796.992 Hz  
FIDRES 0.286819 Hz  
AQ 1.7433076 sec  
RG 2048  
DW 26.600 usec  
DE 6.00 usec  
TE 300.0 K  
D1 2.00000000 sec  
D11 0.03000000 sec  
D12 0.00002000 sec

===== CHANNEL f1 =====  
NUC1 13C  
P1 5.25 usec  
PL1 -6.00 dB  
SF01 75.4106357 MHz

===== CHANNEL f2 =====  
CPDPRG2 waltz16  
NUC2 1H  
PCPD2 115.00 usec  
PL2 0.00 dB  
PL12 19.70 dB  
PL13 19.70 dB  
SF02 299.8711995 MHz

## F2 - Processing parameters

SI 32768  
SF 75.4023410 MHz  
WDW EM  
SSB 0  
LB 1.00 Hz  
GB 0  
PC 1.40

## 1D NMR plot parameters

CX 20.00 cm  
F1P 200.000 ppm  
F1 15080.47 Hz  
F2P -10.000 ppm  
F2 -754.02 Hz  
PPMCM 10.50000 ppm/cm  
HZCM 791.72461 Hz/cm



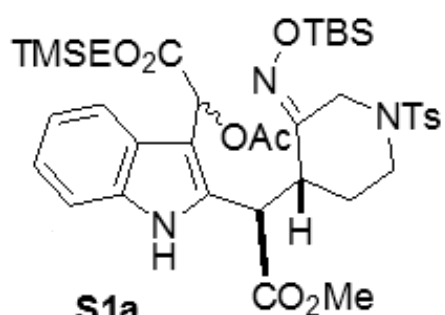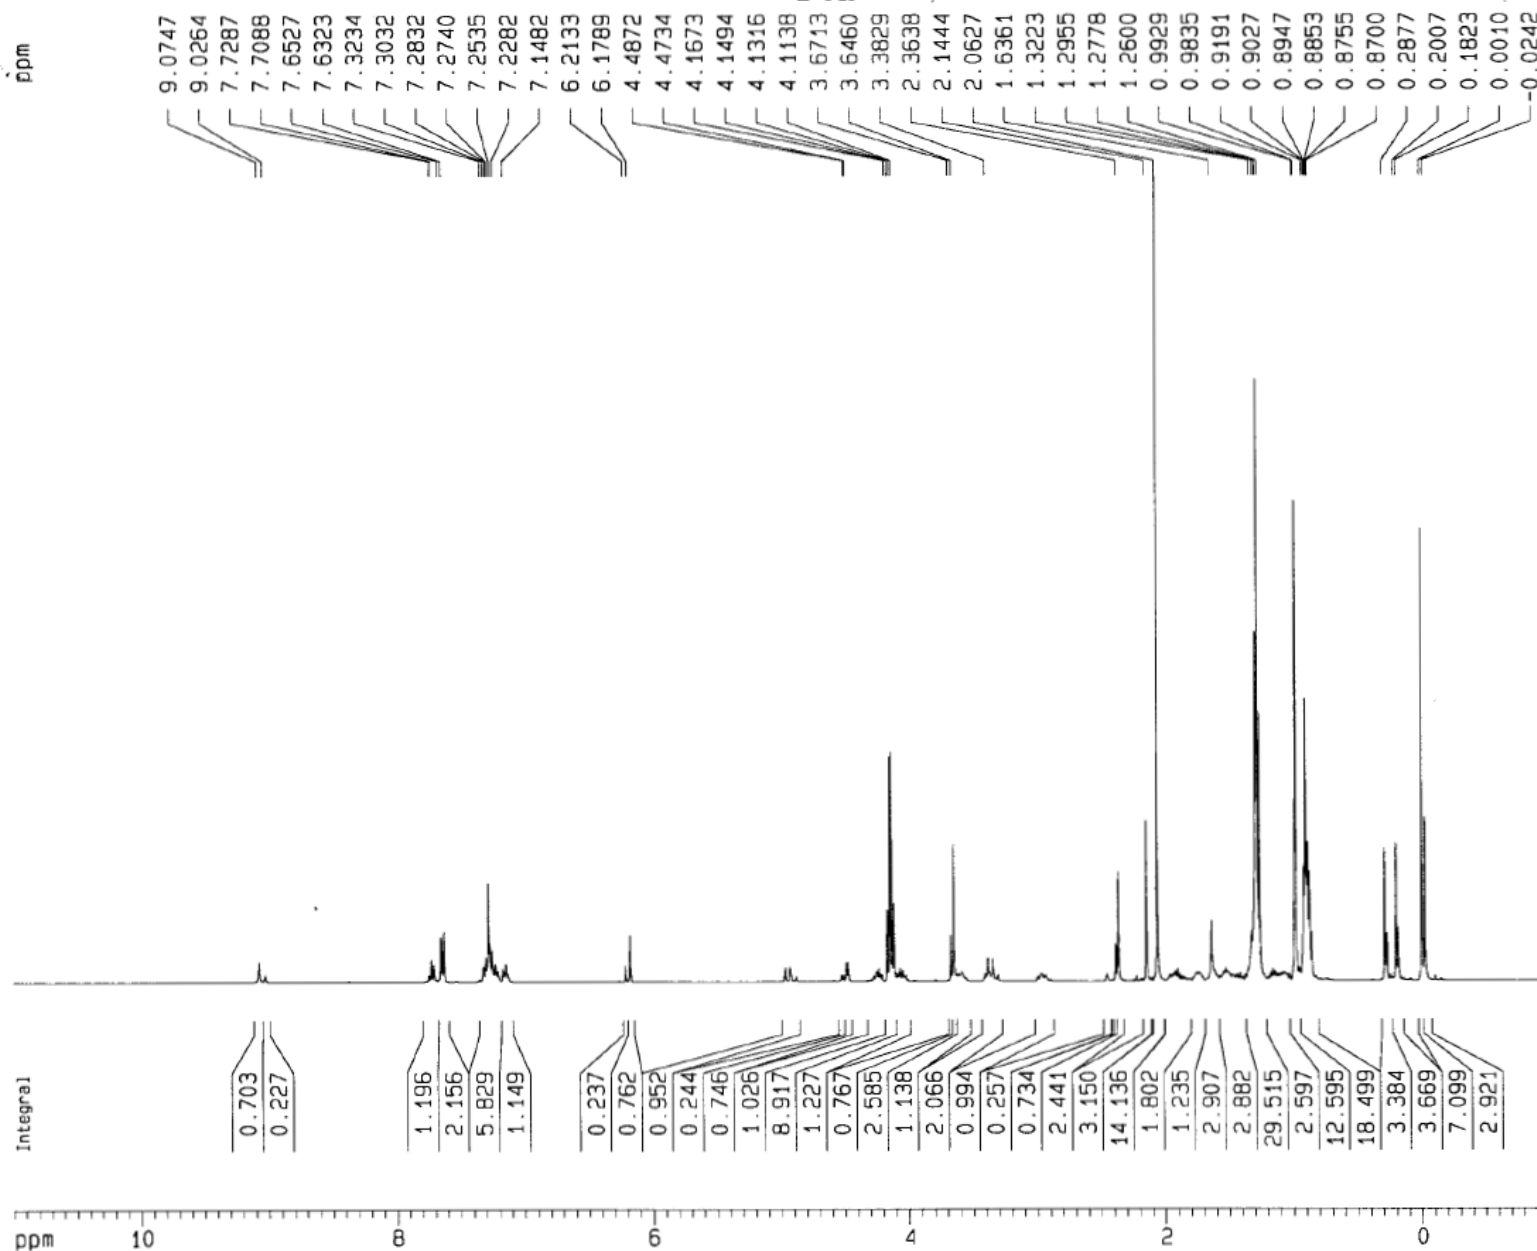

## Current Data Parameters

NAME 012710mm4284  
 EXPNO 2  
 PROCNO 1

## F2 - Acquisition Parameters

Date\_ 20100127  
 Time 10.11  
 INSTRUM spect  
 PROBHD 5 mm BBI 1H-B  
 PULPROG zg30  
 TD 33110  
 SOLVENT CDCl3  
 NS 16  
 DS 2  
 SWH 8278.146 Hz  
 FIDRES 0.250019 Hz  
 AQ 1.9998940 sec  
 RG 64  
 DW 60.400 usec  
 DE 6.00 usec  
 TE 300.0 K  
 D1 1.00000000 sec

## ===== CHANNEL f1 =====

NUC1 1H  
 P1 6.45 usec  
 PL1 0.00 dB  
 SFO1 400.1324710 MHz

## F2 - Processing parameters

SI 32768  
 SF 400.1300000 MHz  
 WDW no  
 SSB 0  
 LB 0.00 Hz  
 GB 0  
 PC 1.00

## 1D NMR plot parameters

CX 20.00 cm  
 F1P 11.000 ppm  
 F1 4401.43 Hz  
 F2P -1.000 ppm  
 F2 -400.13 Hz  
 PPMCM 0.60000 ppm/cm  
 HZCM 240.07800 Hz/cm

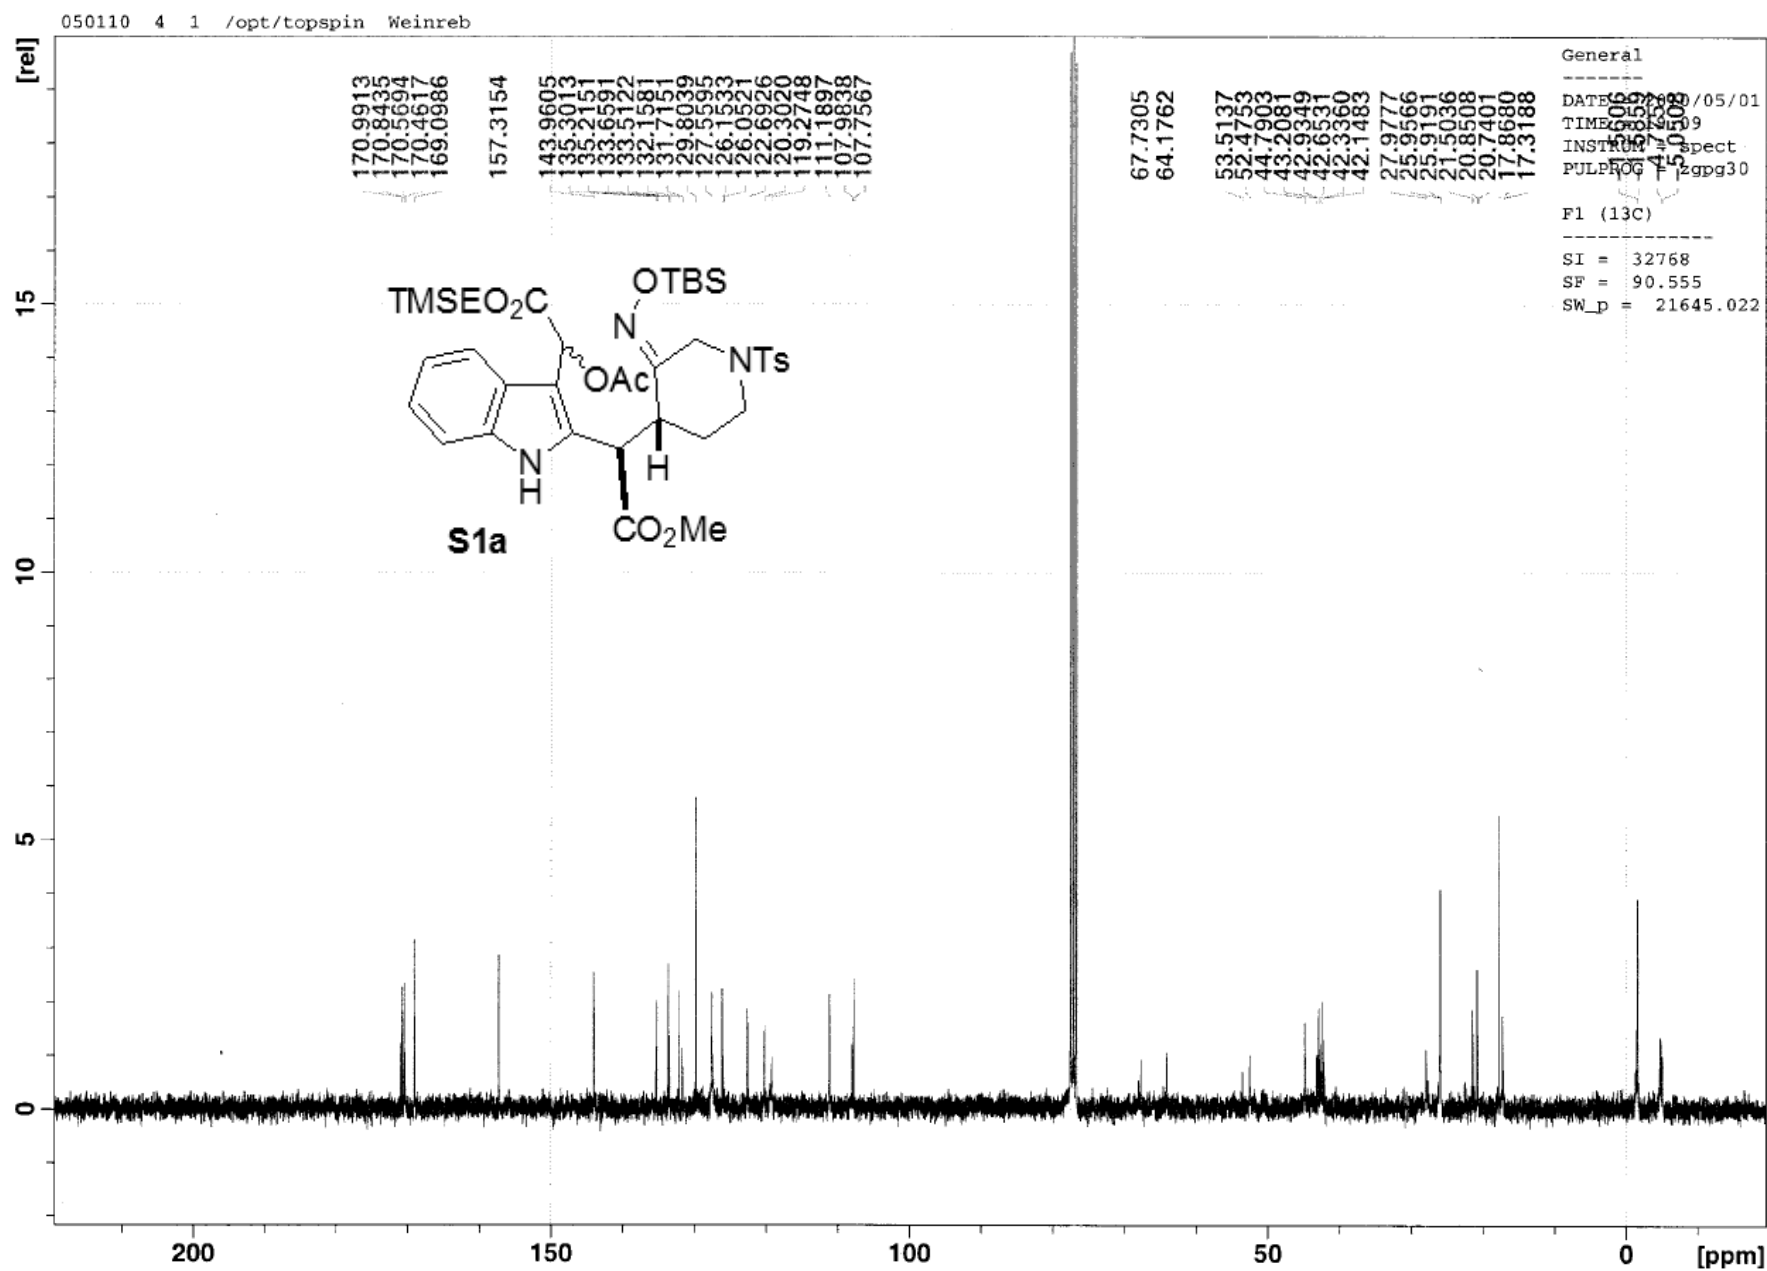

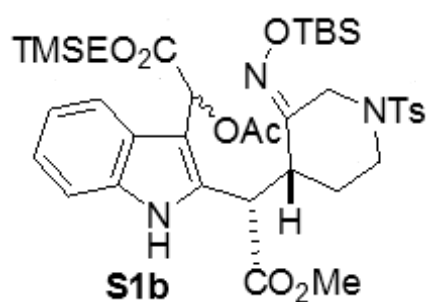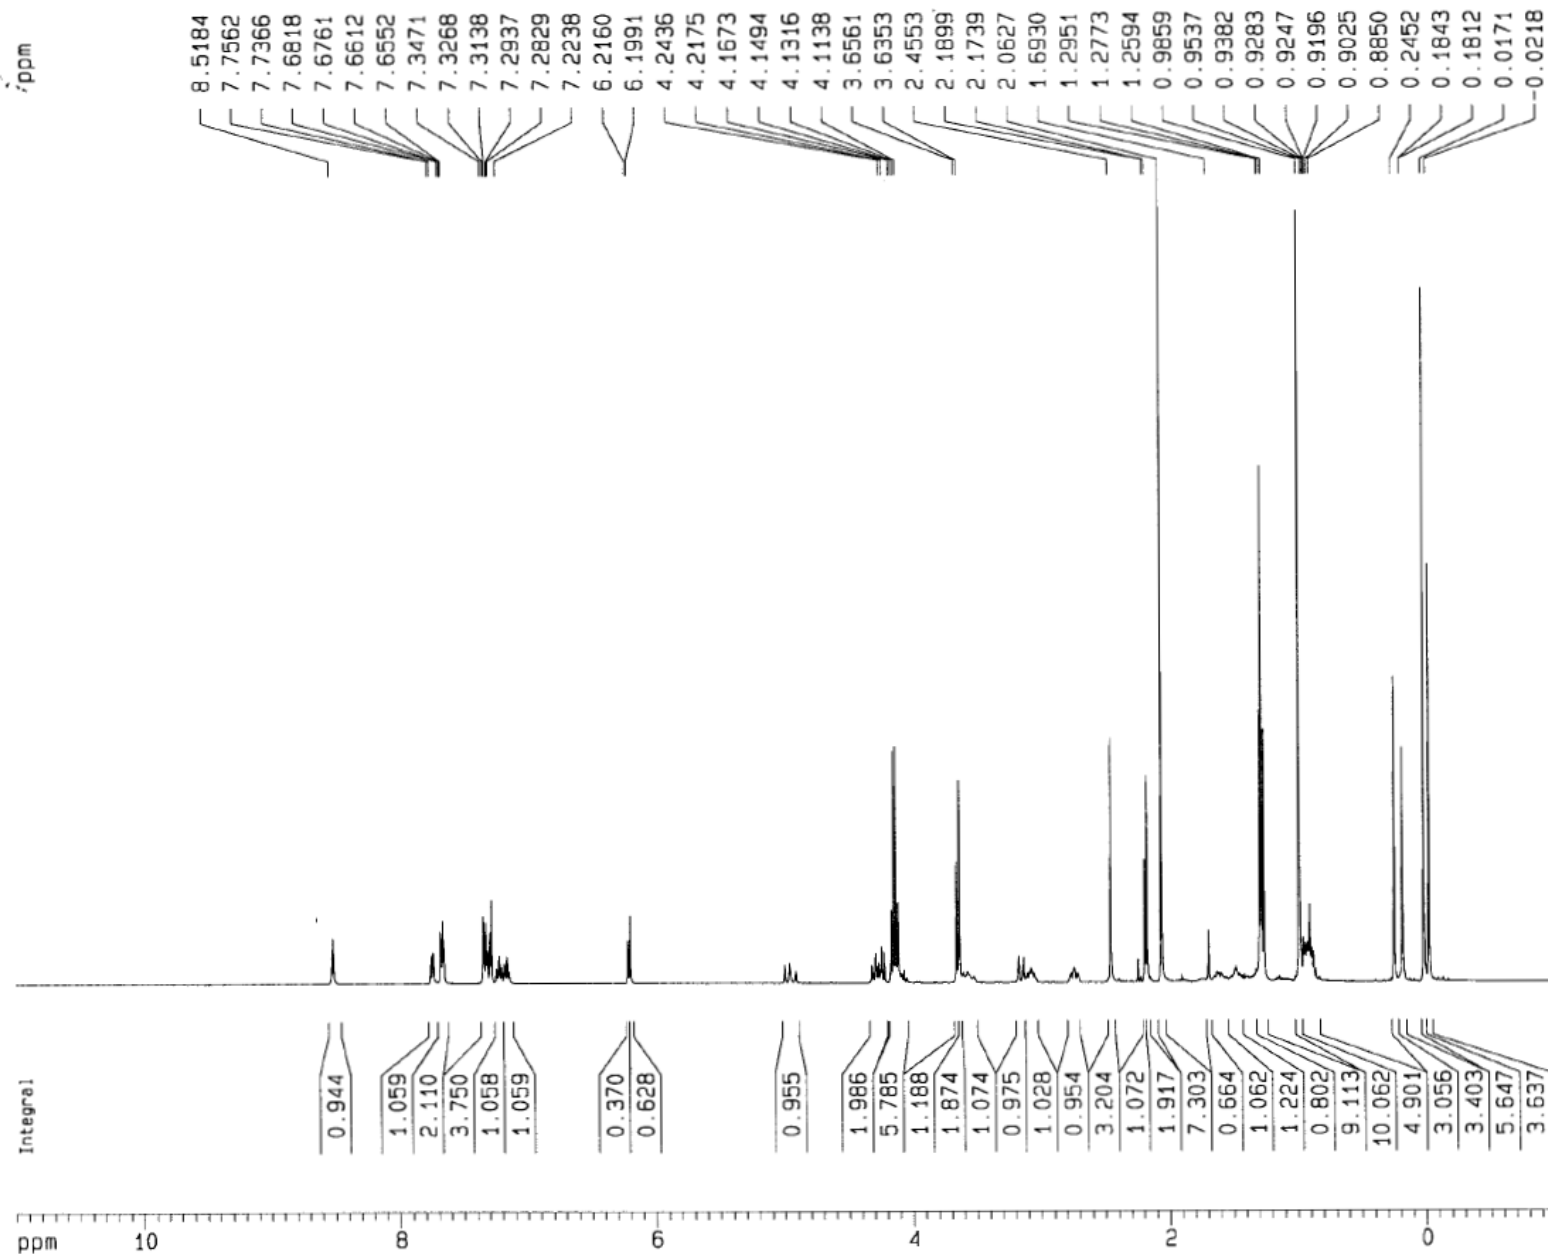

Current Data Parameters  
 NAME 012710mm4284  
 EXPNO 1  
 PROCNO 1

F2 - Acquisition Parameters  
 Date\_ 20100127  
 Time 10.05  
 INSTRUM spect  
 PROBH0 5 mm BBI 1H-B  
 PULPROG zg30  
 TD 33110  
 SOLVENT CDC13  
 NS 16  
 DS 2  
 SWH 8278.146 Hz  
 FIDRES 0.250019 Hz  
 AQ 1.9998940 sec  
 RG 57  
 DW 60.400 usec  
 DE 6.00 usec  
 TE 300.0 K  
 D1 1.00000000 sec

----- CHANNEL f1 -----  
 NUC1 1H  
 P1 6.45 usec  
 PL1 0.00 dB  
 SF01 400.1324710 MHz

F2 - Processing parameters  
 SI 32768  
 SF 400.1300000 MHz  
 WDW no  
 SSB 0  
 LB 0.00 Hz  
 GB 0  
 PC 1.00

1D NMR plot parameters  
 CX 20.00 cm  
 F1P 11.000 ppm  
 F1 4401.43 Hz  
 F2P -1.000 ppm  
 F2 -400.13 Hz  
 PPMCM 0.60000 ppm/cm  
 HZCM 240.07800 Hz/cm

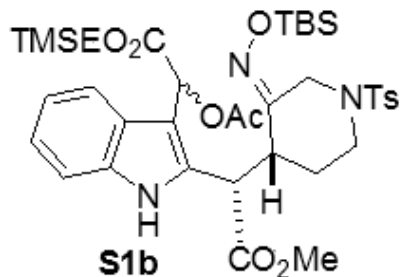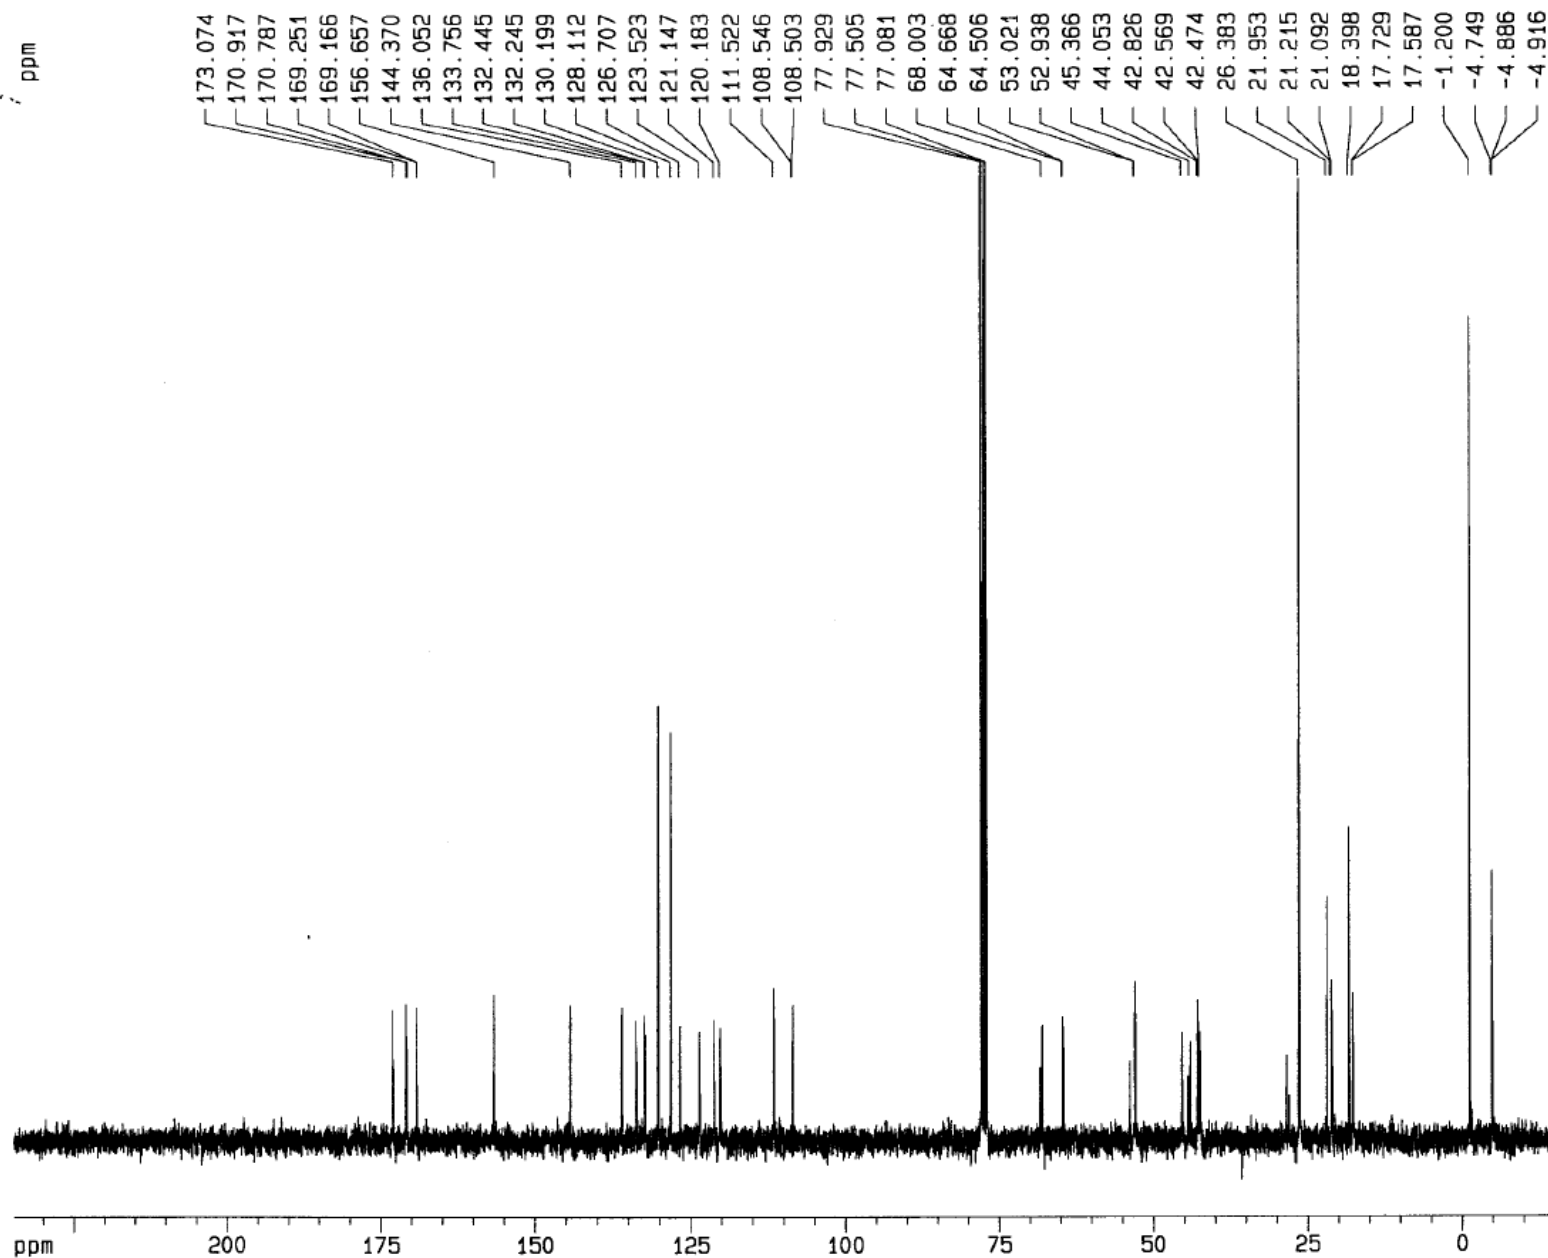

Current Data Parameters  
NAME 050110  
EXPNO 2  
PROCNO 1

F2 - Acquisition Parameters  
Date\_ 20100501  
Time 17.37  
INSTRUM spect  
PROBHD 5 mm Multinu  
PULPROG zgpg30  
TD 65536  
SOLVENT CDCl3  
NS 599  
DS 4  
SWH 18832.393 Hz  
FIDRES 0.287360 Hz  
AQ 1.7400308 sec  
RG 16384  
DW 26.550 usec  
DE 6.00 usec  
TE 300.0 K  
D1 2.00000000 sec  
d11 0.03000000 sec  
d12 0.00002000 sec

----- CHANNEL f1 -----  
NUC1 13C  
P1 11.80 usec  
PL1 0.00 dB  
SFO1 75.4760200 MHz

----- CHANNEL f2 -----  
CPDPRG2 waltz16  
NUC2 1H  
PCPD2 110.00 usec  
PL2 0.00 dB  
PL12 17.50 dB  
PL13 17.50 dB  
SFO2 300.1312005 MHz

F2 - Processing parameters  
SI 32768  
SF 75.4677190 MHz  
WDW EM  
SSB 0  
LB 1.00 Hz  
GB 0  
PC 1.40

1D NMR plot parameters  
CX 20.00 cm  
F1P 234.765 ppm  
F1 17717.16 Hz  
F2P -14.778 ppm  
F2 -1115.23 Hz  
PPMCM 12.47712 ppm/cm  
HZCM 941.61951 Hz/cm

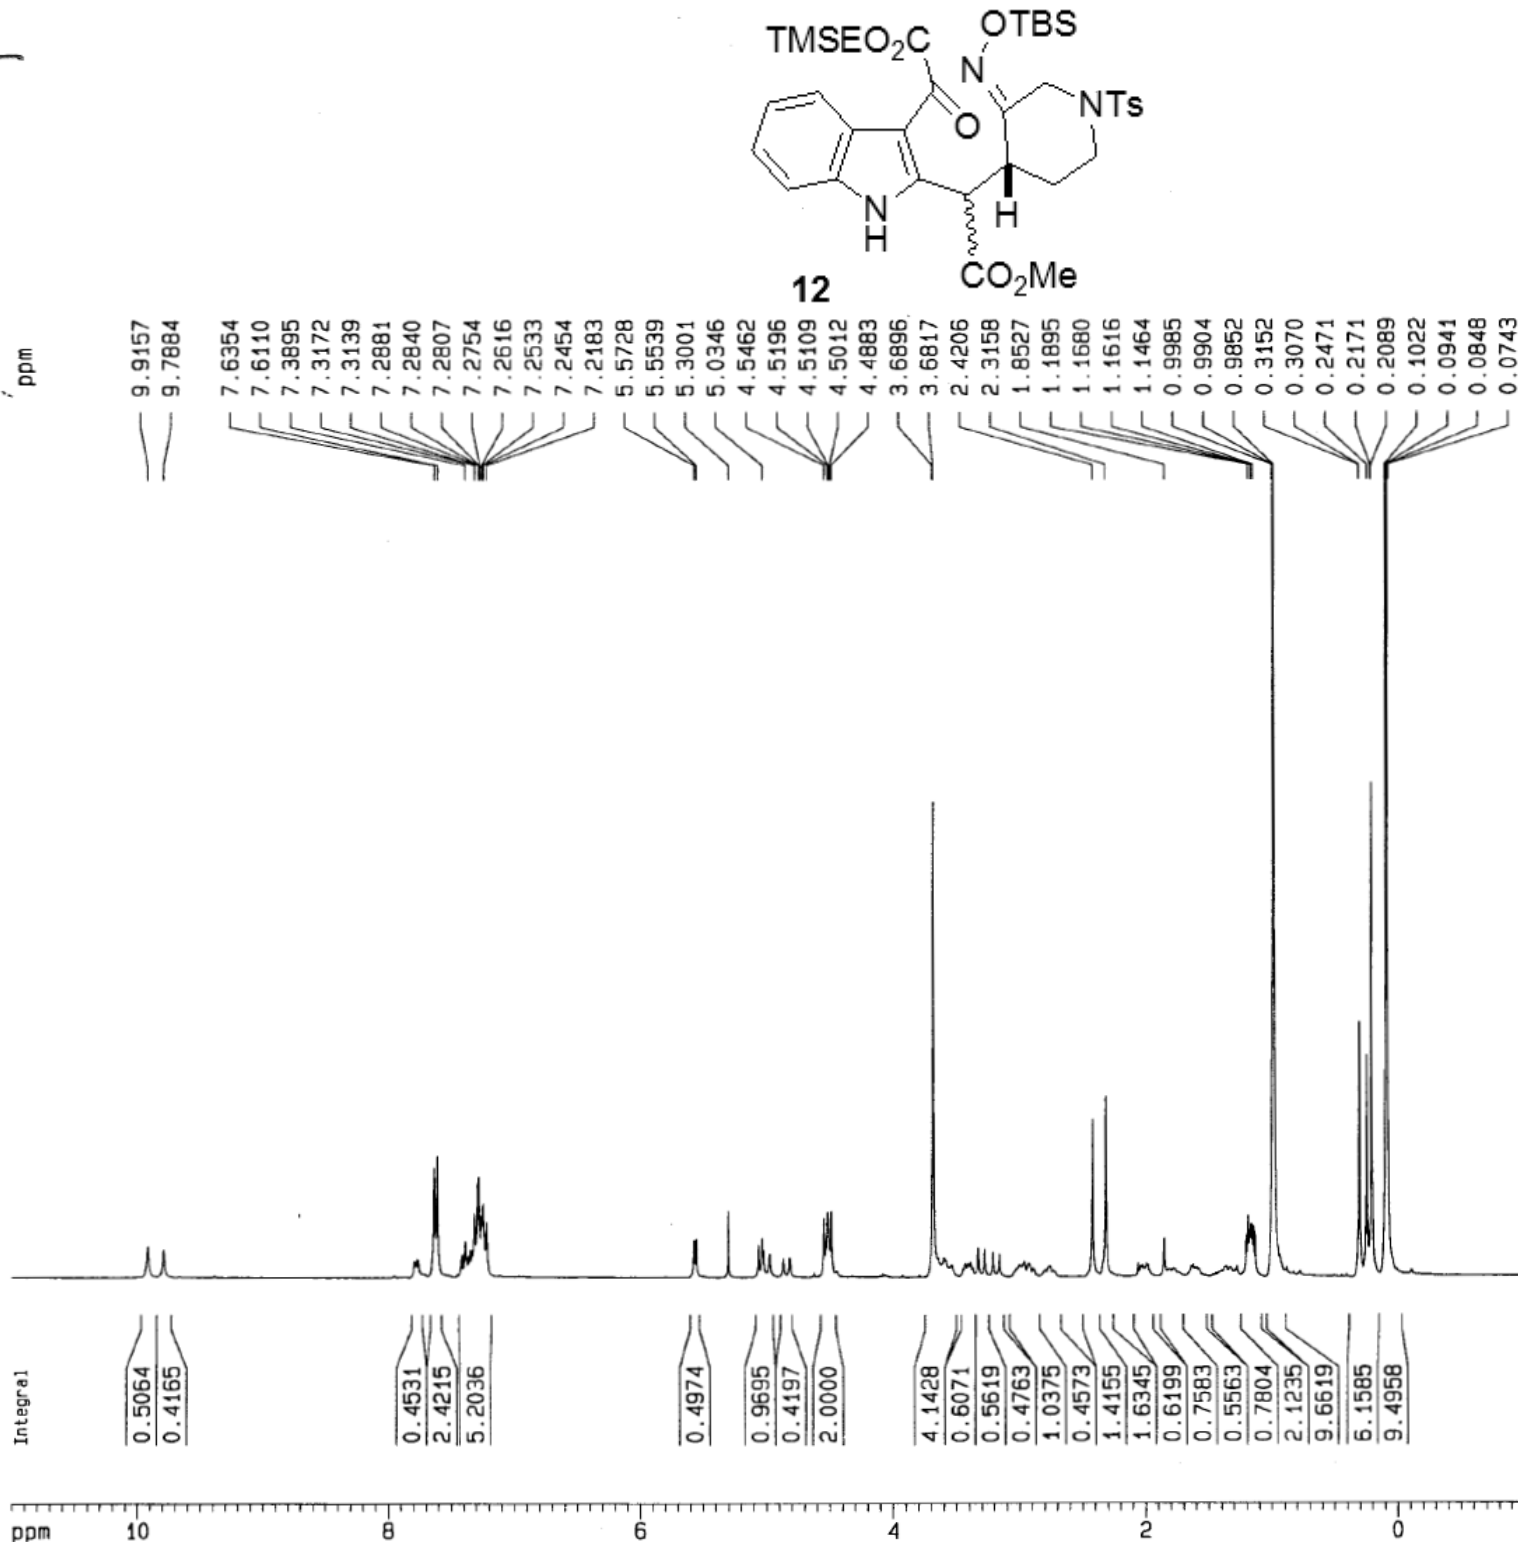

Current Data Parameters  
 NAME 043010  
 EXPNO 1  
 PROCNO 1

F2 - Acquisition Parameters  
 Date\_ 20100430  
 Time 15.47  
 INSTRUM spect  
 PROBHD 5 mm Multinu  
 PULPROG zg30  
 TD 24590  
 SOLVENT CDC13  
 NS 8  
 DS 2  
 SWH 6172.839 Hz  
 FIDRES 0.250014 Hz  
 AQ 1.9999400 sec  
 RG 114  
 DW 81.000 usec  
 DE 6.00 usec  
 TE 300.0 K  
 D1 1.00000000 sec

===== CHANNEL f1 =====  
 NUC1 1H  
 P1 9.50 usec  
 PL1 -6.00 dB  
 SFO1 300.1318534 MHz

F2 - Processing parameters  
 SI 32768  
 SF 300.1300000 MHz  
 WDW no  
 SSB 0  
 LB 0.00 Hz  
 GB 0  
 PC 1.00

1D NMR plot parameters  
 CX 20.00 cm  
 F1P 11.000 ppm  
 F1 3301.43 Hz  
 F2P -1.000 ppm  
 F2 -300.13 Hz  
 PPMCM 0.60000 ppm/cm  
 HZCM 180.07800 Hz/cm

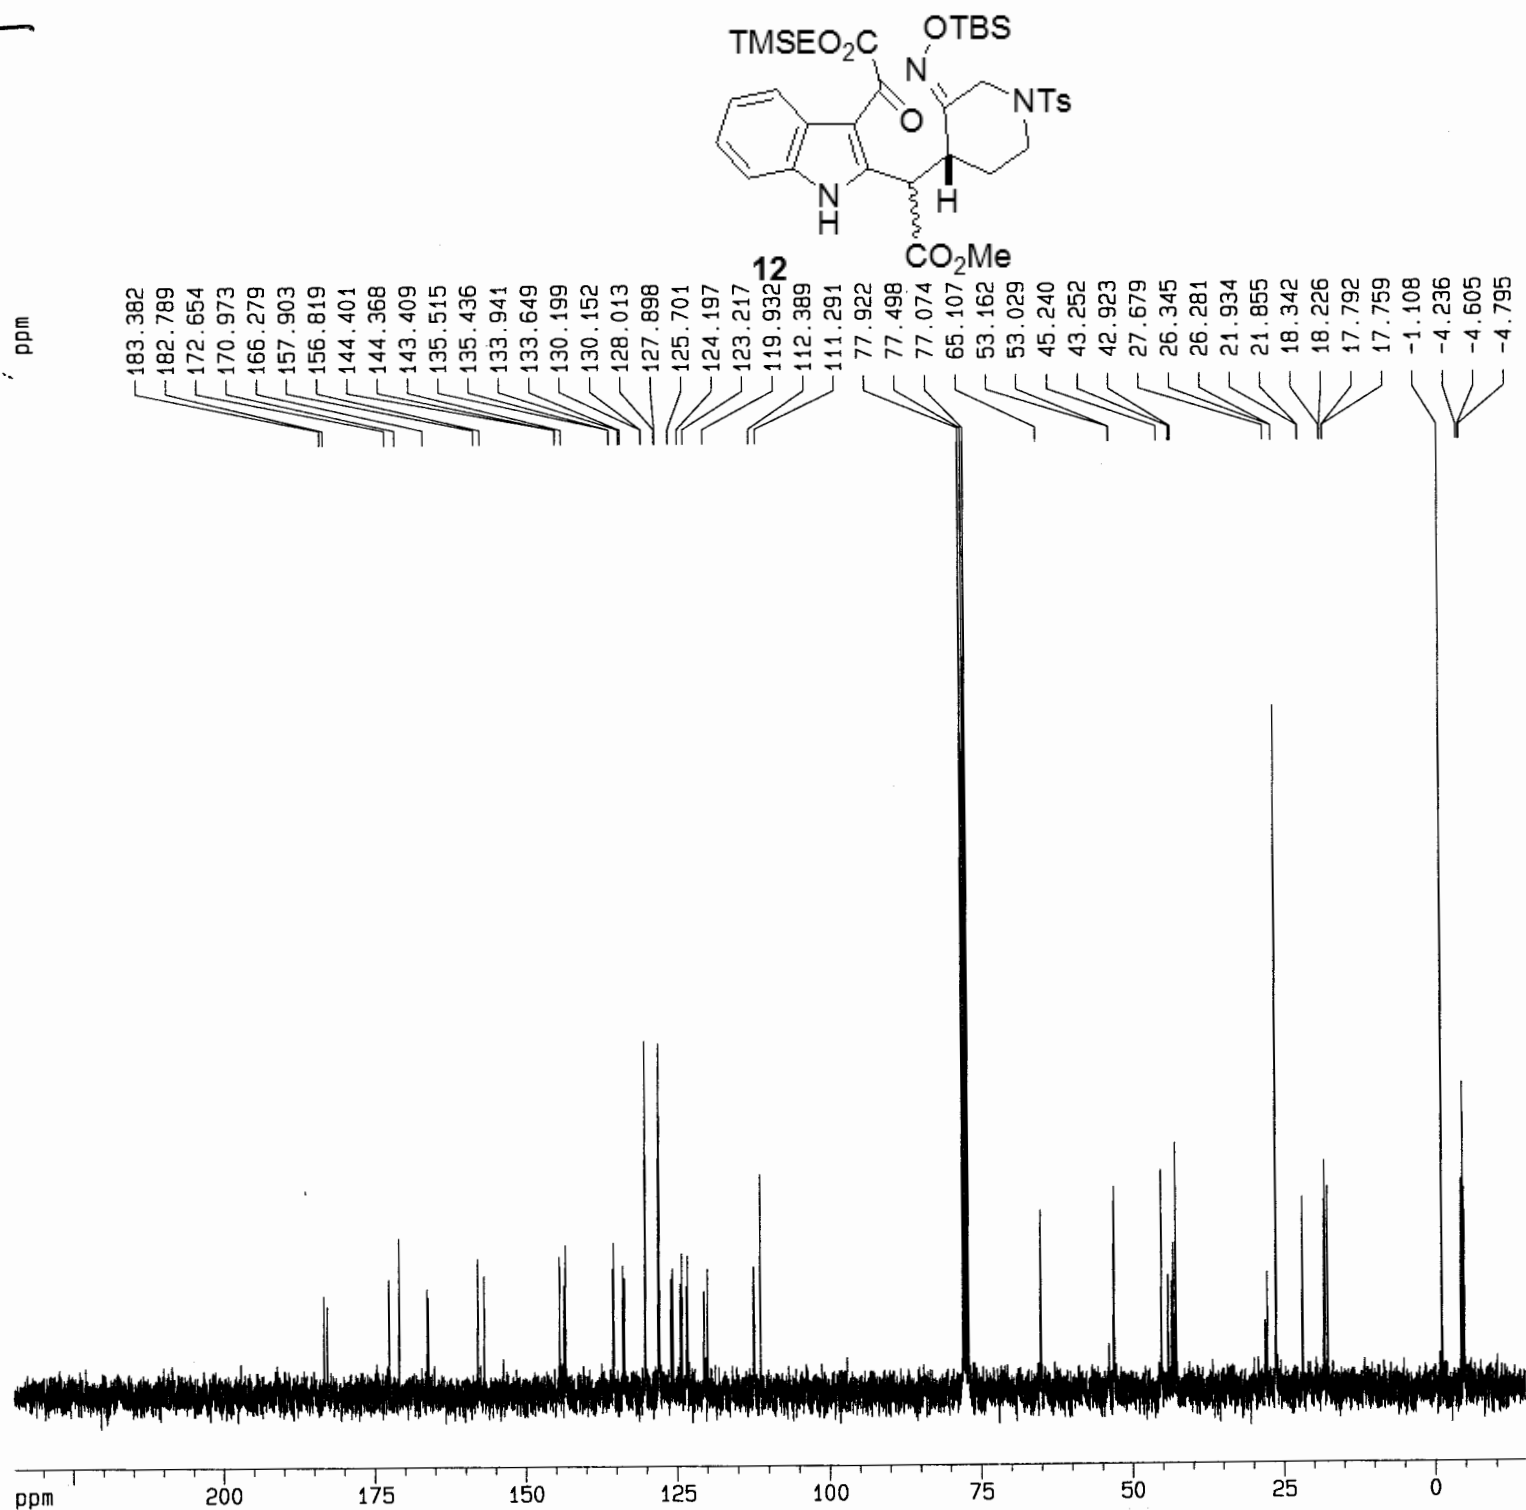

Current Data Parameters  
 NAME 043010  
 EXPNO 2  
 PROCNO 1

## F2 - Acquisition Parameters

Date\_ 20100430  
 Time 15.56  
 INSTRUM spect  
 PROBHD 5 mm Multinu  
 PULPROG zgpg30  
 TD 32768  
 SOLVENT CDC13  
 NS 500  
 DS 4  
 SMH 18832.393 Hz  
 FIDRES 0.574719 Hz  
 AQ 0.8700404 sec  
 RG 16384  
 DW 26.550 usec  
 DE 6.00 usec  
 TE 300.0 K  
 D1 2.00000000 sec  
 d11 0.03000000 sec  
 d12 0.00002000 sec

===== CHANNEL f1 =====  
 NUC1 13C  
 P1 11.80 usec  
 PL1 0.00 dB  
 SF01 75.4760200 MHz

===== CHANNEL f2 =====  
 CPDPRG2 waltz16  
 NUC2 1H  
 PCPD2 110.00 usec  
 PL2 0.00 dB  
 PL12 17.50 dB  
 PL13 17.50 dB  
 SF02 300.1312005 MHz

F2 - Processing parameters  
 SI 32768  
 SF 75.4677190 MHz  
 WDW EM  
 SSB 0  
 LB 1.00 Hz  
 GB 0  
 PC 1.40

## 1D NMR plot parameters

CX 20.00 cm  
 F1P 234.765 ppm  
 F1 17717.16 Hz  
 F2P -14.778 ppm  
 F2 -1115.24 Hz  
 PPMCM 12.47712 ppm/cm  
 HZCM 941.61963 Hz/cm

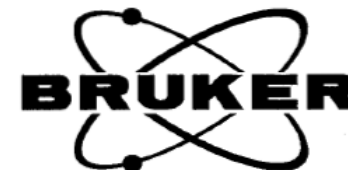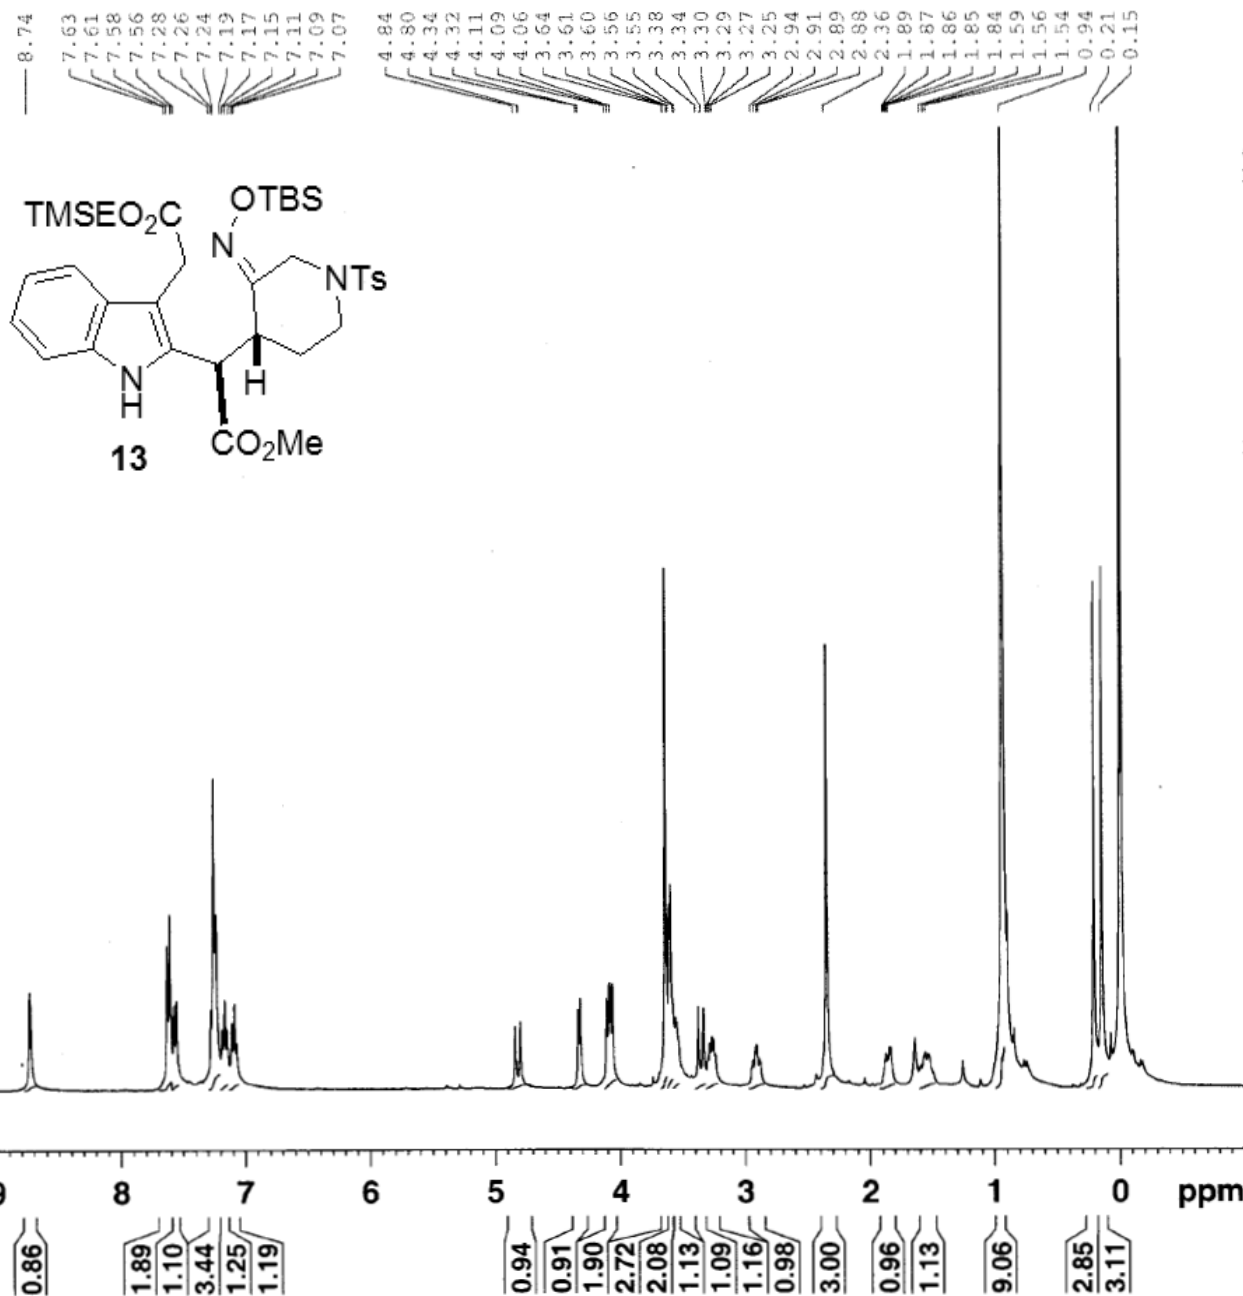

Current Data Parameters  
 NAME 092212FYQ-Compound13  
 EXPNO 1  
 PROCNO 1

F2 - Acquisition Parameters  
 Date\_ 20120922  
 Time 23.19  
 INSTRUM spect  
 PROBHD 5 mm QNP 1H/15  
 PULPROG zg30  
 TD 65536  
 SOLVENT CDC13  
 NS 16  
 DS 2  
 SWH 7440.476 Hz  
 FIDRES 0.113533 Hz  
 AQ 4.4040694 sec  
 RG 181  
 DW 67.200 usec  
 DE 6.00 usec  
 TE 295.7 K  
 D1 1.0000000 sec  
 TDO 1

===== CHANNEL f1 =====  
 NUC1 1H  
 P1 14.93 usec  
 PL1 -3.00 dB  
 SFO1 360.1322240 MHz

F2 - Processing parameters  
 SI 32768  
 SF 360.1300145 MHz  
 WDW EM  
 SSB 0  
 LB 0.30 Hz  
 GB 0  
 PC 1.00

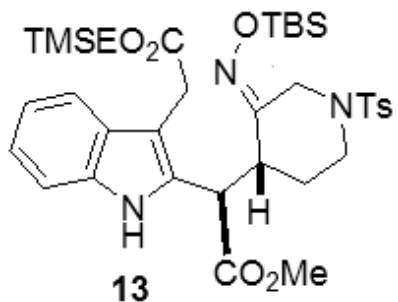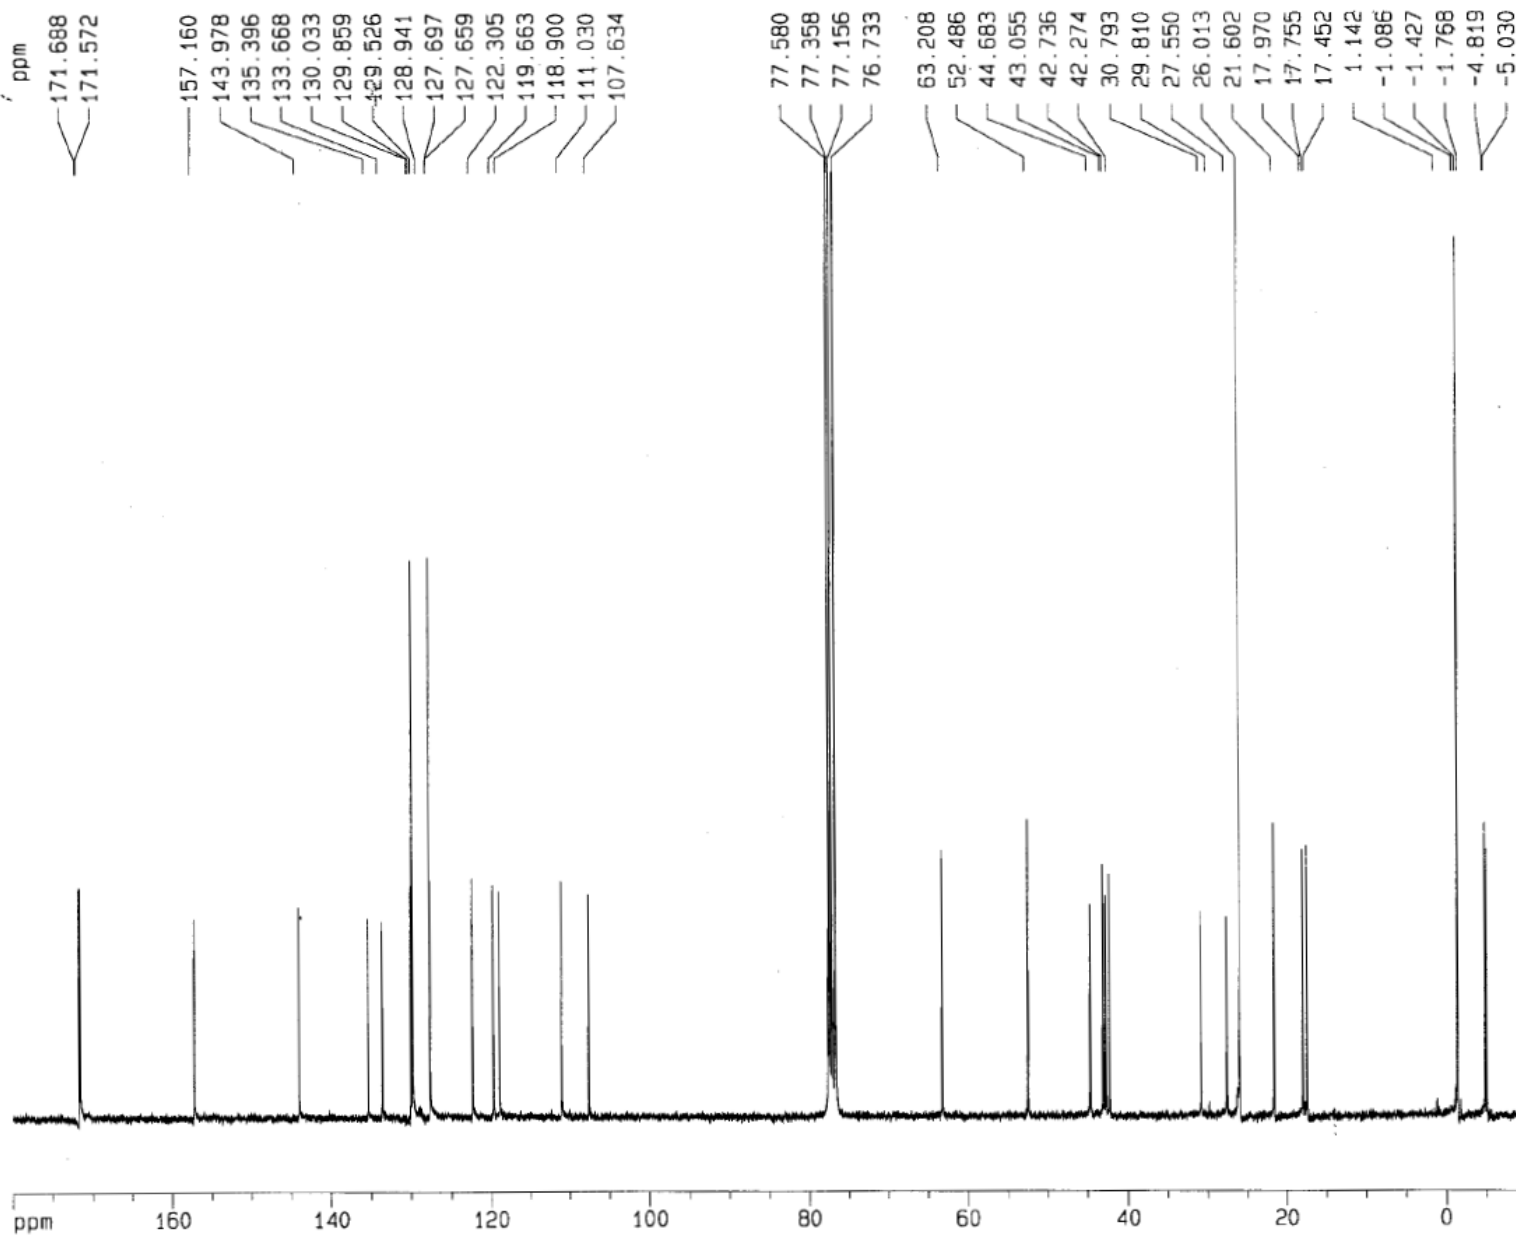

Current Data Parameters  
NAME 092212FY0cpd13  
EXPNO 2  
PROCNO 1

F2 - Acquisition Parameters  
Date\_ 20120922  
Time 22.08  
INSTRUM spect  
PROBHD 5 mm GNP 1H/1  
PULPROG zgpg30  
TD 65536  
SOLVENT CDC13  
NS 7168  
DS 4  
SWH 18796.992 Hz  
FIDRES 0.286819 Hz  
AQ 1.7433076 sec  
RG 1024  
DW 26.600 usec  
DE 6.00 usec  
TE 300.0 K  
D1 2.00000000 sec  
D11 0.03000000 sec  
D12 0.00002000 sec

===== CHANNEL f1 =====  
NUC1 13C  
P1 5.25 usec  
PL1 -6.00 dB  
SF01 75.4106357 MHz

===== CHANNEL f2 =====  
CPDPRG2 waltz16  
NUC2 1H  
PCPD2 115.00 usec  
PL2 0.00 dB  
PL12 19.70 dB  
PL13 19.70 dB  
SF02 299.8711995 MHz

F2 - Processing parameters  
SI 32768  
SF 75.4023654 MHz  
WDW EM  
SSB 0  
LB 1.00 Hz  
GB 0  
PC 1.40

1D NMR plot parameters  
CX 20.00 cm  
F1P 180.000 ppm  
F1 13572.43 Hz  
F2P -10.000 ppm  
F2 -754.02 Hz  
PPMCM 9.50000 ppm/cm  
HZCM 716.32251 Hz/cm



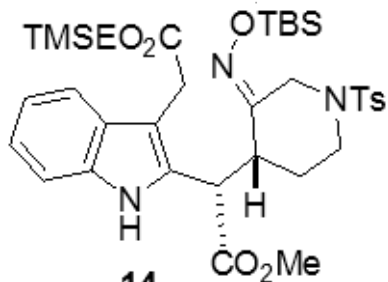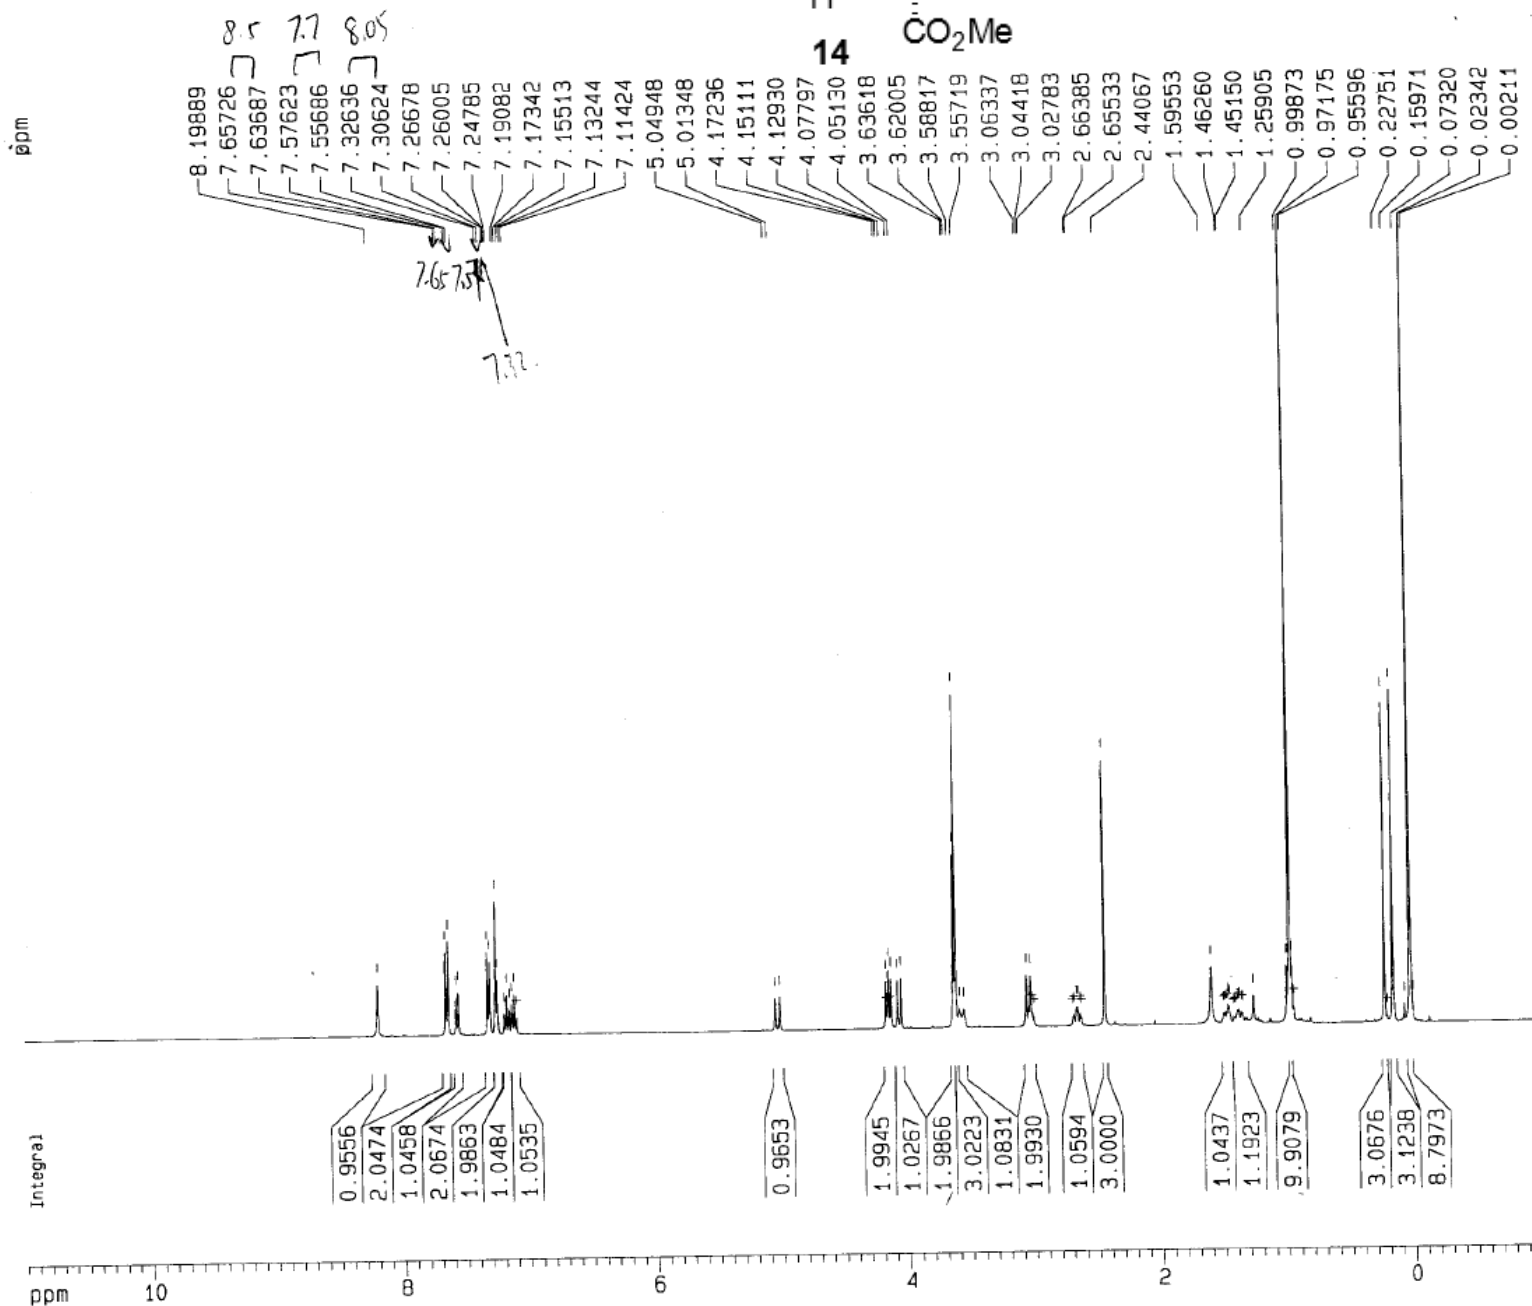

Current Data Parameters  
 NAME 071911FJ11-019  
 EXPNO 1  
 PROCNO 1

## F2 - Acquisition Parameters

Date\_ 20110719  
 Time 9.33  
 INSTRUM spect  
 PROBHD 5 mm BBI 1H-  
 PULPROG zg30  
 TD 65536  
 SOLVENT CDCl3  
 NS 16  
 DS 2  
 SWH 8278.146 Hz  
 FIDRES 0.126314 Hz  
 AQ 3.9584243 sec  
 RG 90.5  
 DW 60.400 usec  
 DE 6.00 usec  
 TE 300.0 K  
 D1 1.00000000 sec

----- CHANNEL f1 -----  
 NUC1 1H  
 P1 6.45 usec  
 PL1 0.00 dB  
 SFO1 400.1324710 MHz

## F2 - Processing parameters

SI 32768  
 SF 400.1300086 MHz  
 WDW EM  
 SSB 0  
 LB 0.30 Hz  
 GB 0  
 PC 1.00

## 1D NMR plot parameters

CX 20.00 cm  
 F1P 11.000 ppm  
 F1 4401.43 Hz  
 F2P -1.000 ppm  
 F2 -400.13 Hz  
 PPMCM 0.60000 ppm/cm  
 HZCM 240.07800 Hz/cm

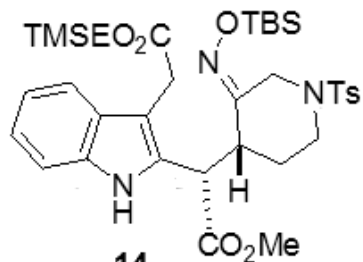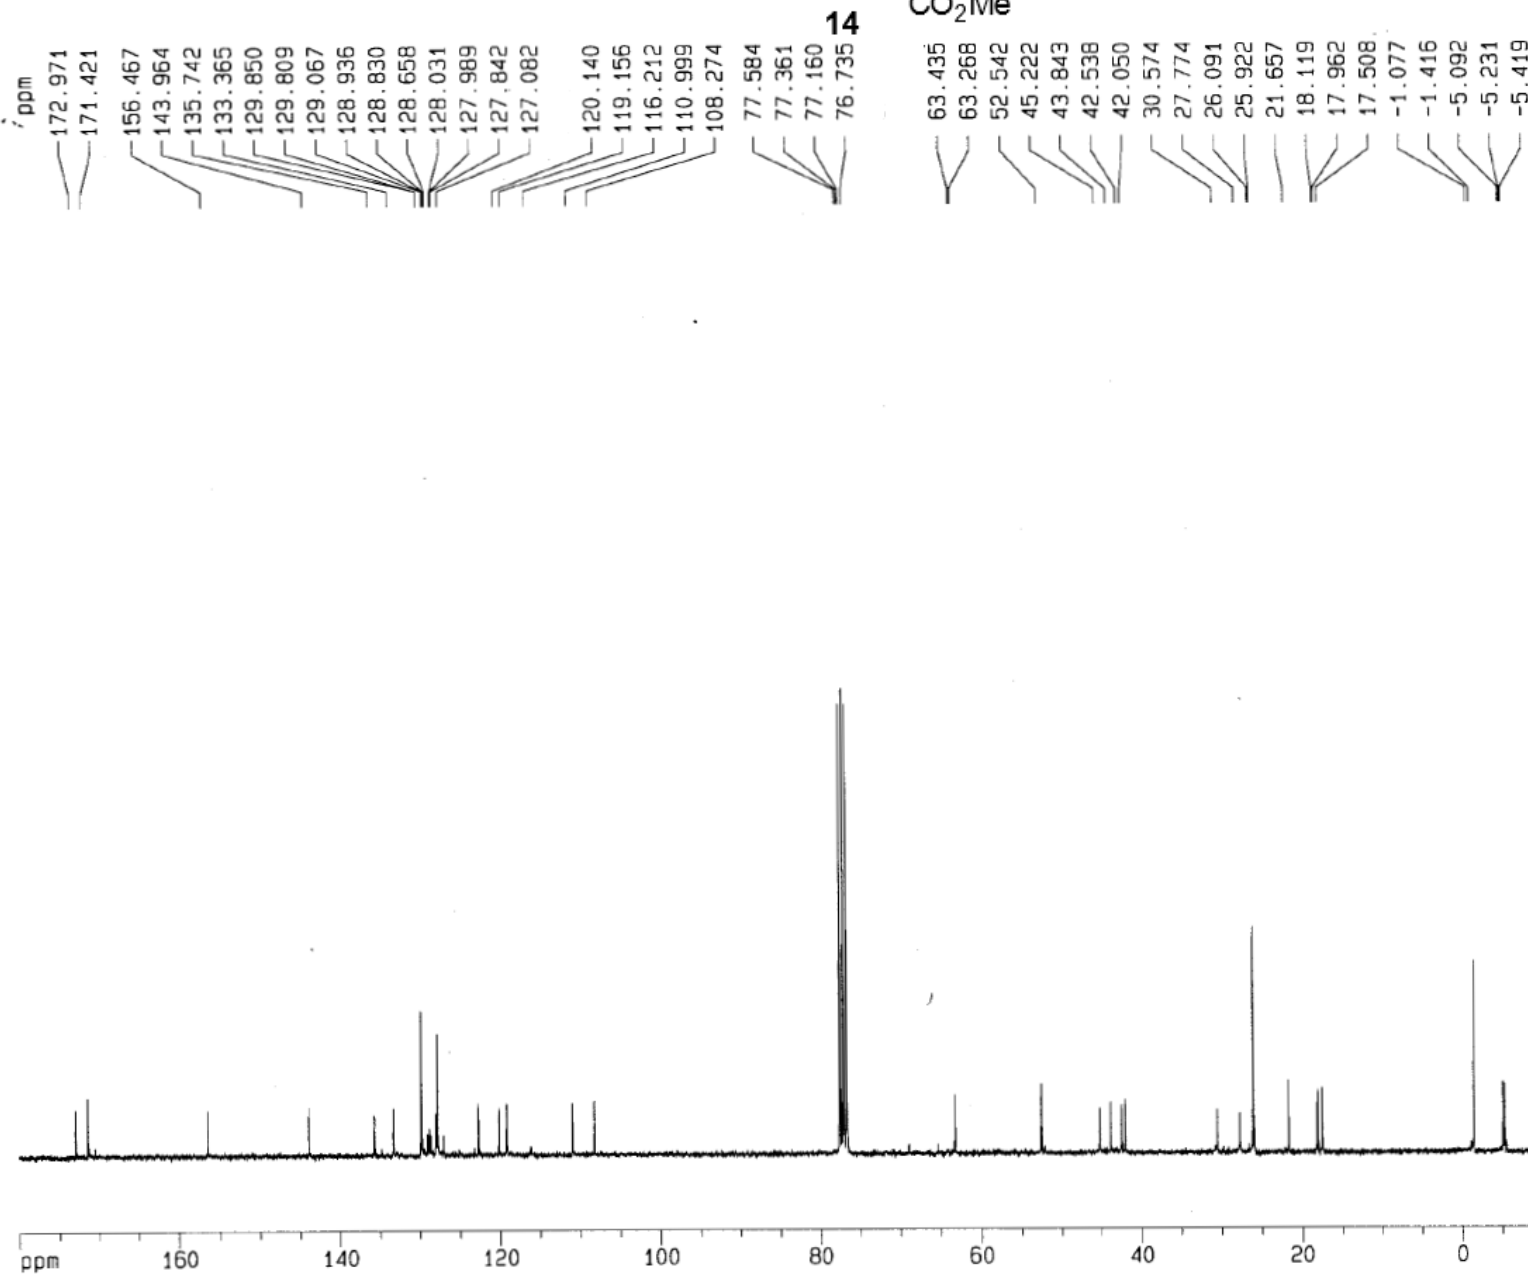

## Current Data Parameters

NAME 092212FYGcpd14  
EXPNO 2  
PROCNO 1

## F2 - Acquisition Parameters

Date\_ 20120922  
Time 23.19  
INSTRUM spect  
PROBHD 5 mm GNP 1H/1  
PULPROG zgpg30  
TD 65536  
SOLVENT CDC13  
NS 1024  
DS 4  
SWH 18796.992 Hz  
FIDRES 0.286819 Hz  
AQ 1.7433076 sec  
RG 1024  
DW 26.600 usec  
DE 6.00 usec  
TE 300.0 K  
D1 2.0000000 sec  
D11 0.0300000 sec  
D12 0.00002000 sec

===== CHANNEL f1 =====  
NUC1 13C  
P1 5.25 usec  
PL1 -6.00 dB  
SF01 75.4106357 MHz

===== CHANNEL f2 =====  
CPDPRG2 waltz16  
NUC2 1H  
PCPD2 115.00 usec  
PL2 0.00 dB  
PL12 19.70 dB  
PL13 19.70 dB  
SF02 299.8711995 MHz

## F2 - Processing parameters

SI 32768  
SF 75.4023660 MHz  
WDW EM  
SSB 0  
LB 1.00 Hz  
GB 0  
PC 1.40

## 1D NMR plot parameters

CX 20.00 cm  
F1P 180.000 ppm  
F1 13572.43 Hz  
F2P -10.000 ppm  
F2 -754.02 Hz  
PPMCM 9.50000 ppm/cm  
HZCM 716.32251 Hz/cm

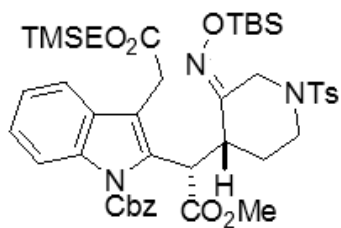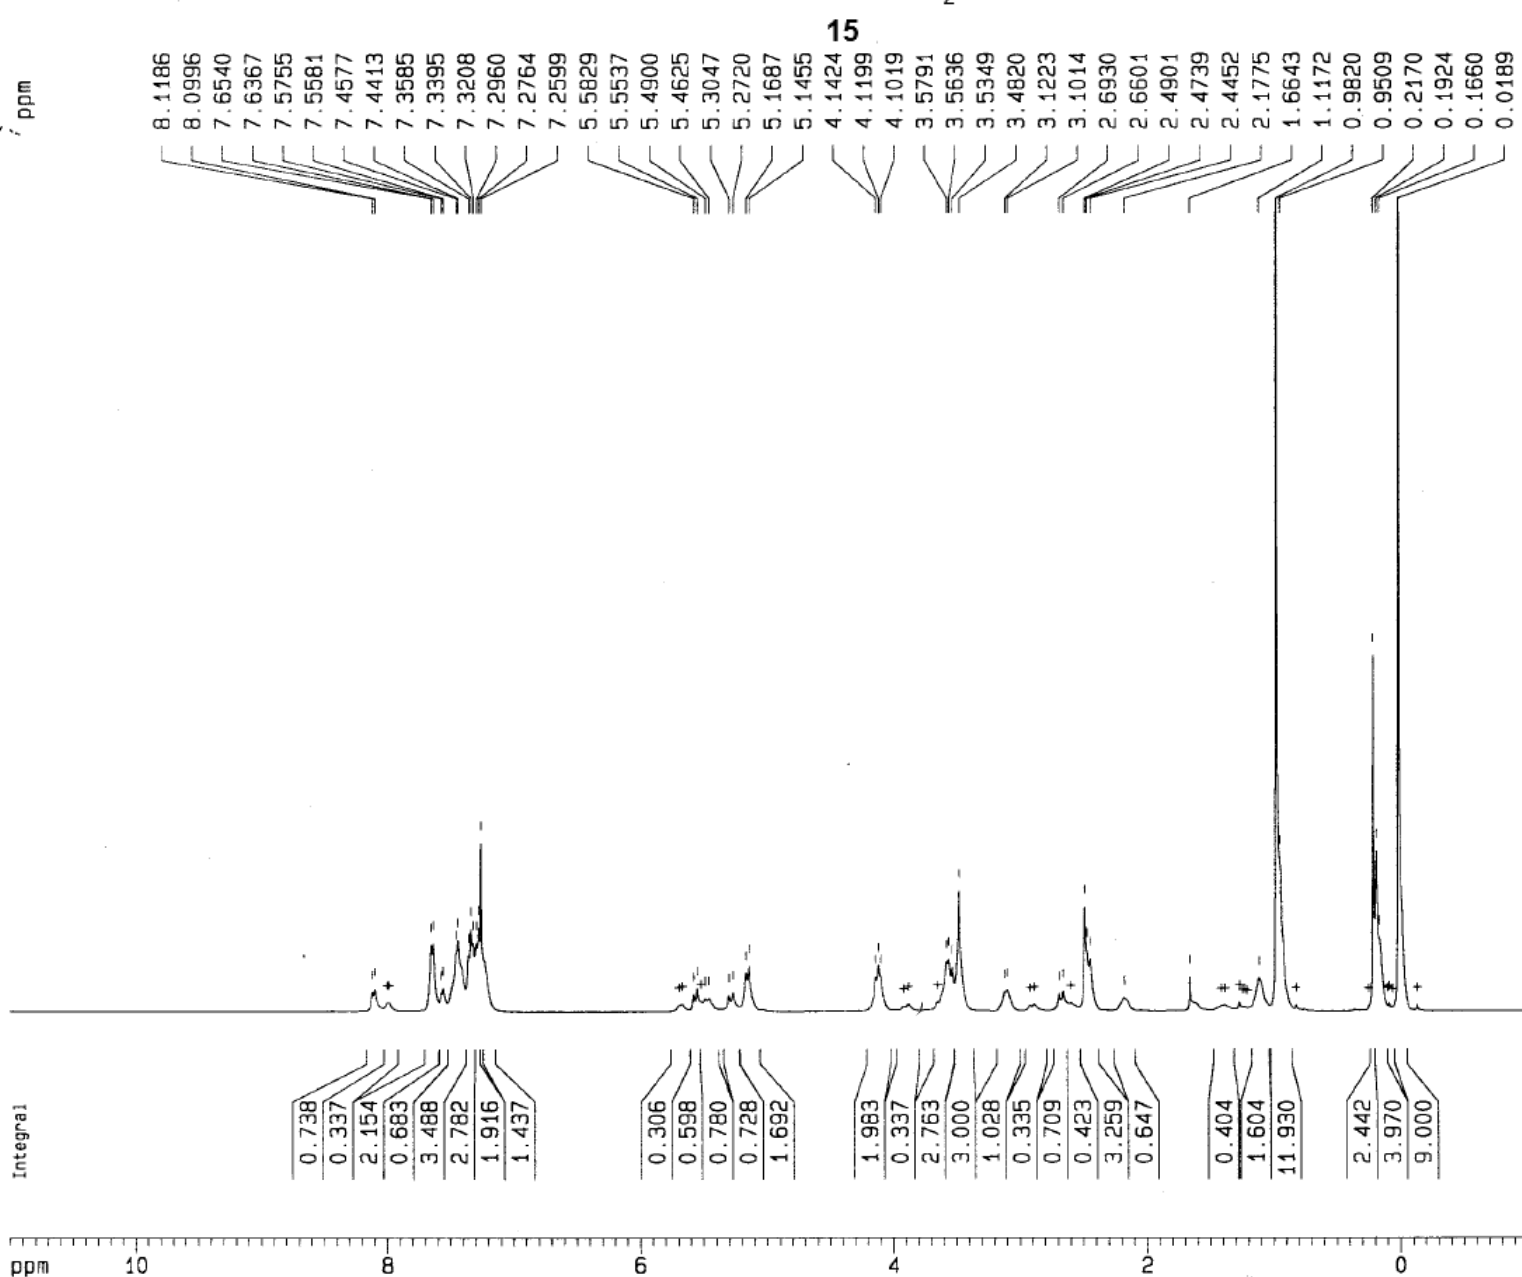

Current Data Parameters  
 NAME 092512FY0-15  
 EXPNO 1  
 PROCNO 1

F2 - Acquisition Parameters  
 Date\_ 20120925  
 Time 18.02  
 INSTRUM spect  
 PROBHD 5 mm BBI 1H-  
 PULPROG zg30  
 TD 65536  
 SOLVENT CDC13  
 NS 16  
 DS 2  
 SWH 8278.146 Hz  
 FIDRES 0.126314 Hz  
 AQ 3.9584243 sec  
 RG 57  
 DW 60.400 usec  
 DE 6.00 usec  
 TE 300.0 K  
 D1 1.00000000 sec

----- CHANNEL f1 -----  
 NUC1 1H  
 P1 6.45 usec  
 PL1 0.00 dB  
 SF01 400.1324710 MHz

F2 - Processing parameters  
 SI 32768  
 SF 400.1300096 MHz  
 WDW EM  
 SSB 0  
 LB 0.30 Hz  
 GB 0  
 PC 1.00

1D NMR plot parameters  
 CX 20.00 cm  
 F1P 11.000 ppm  
 F1 4401.43 Hz  
 F2P -1.000 ppm  
 F2 -400.13 Hz  
 PPMCM 0.60000 ppm/cm  
 HZCM 240.07800 Hz/cm

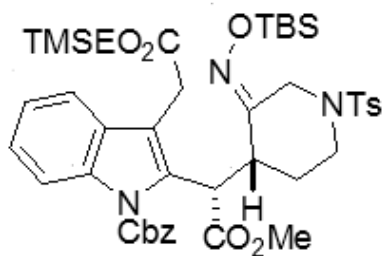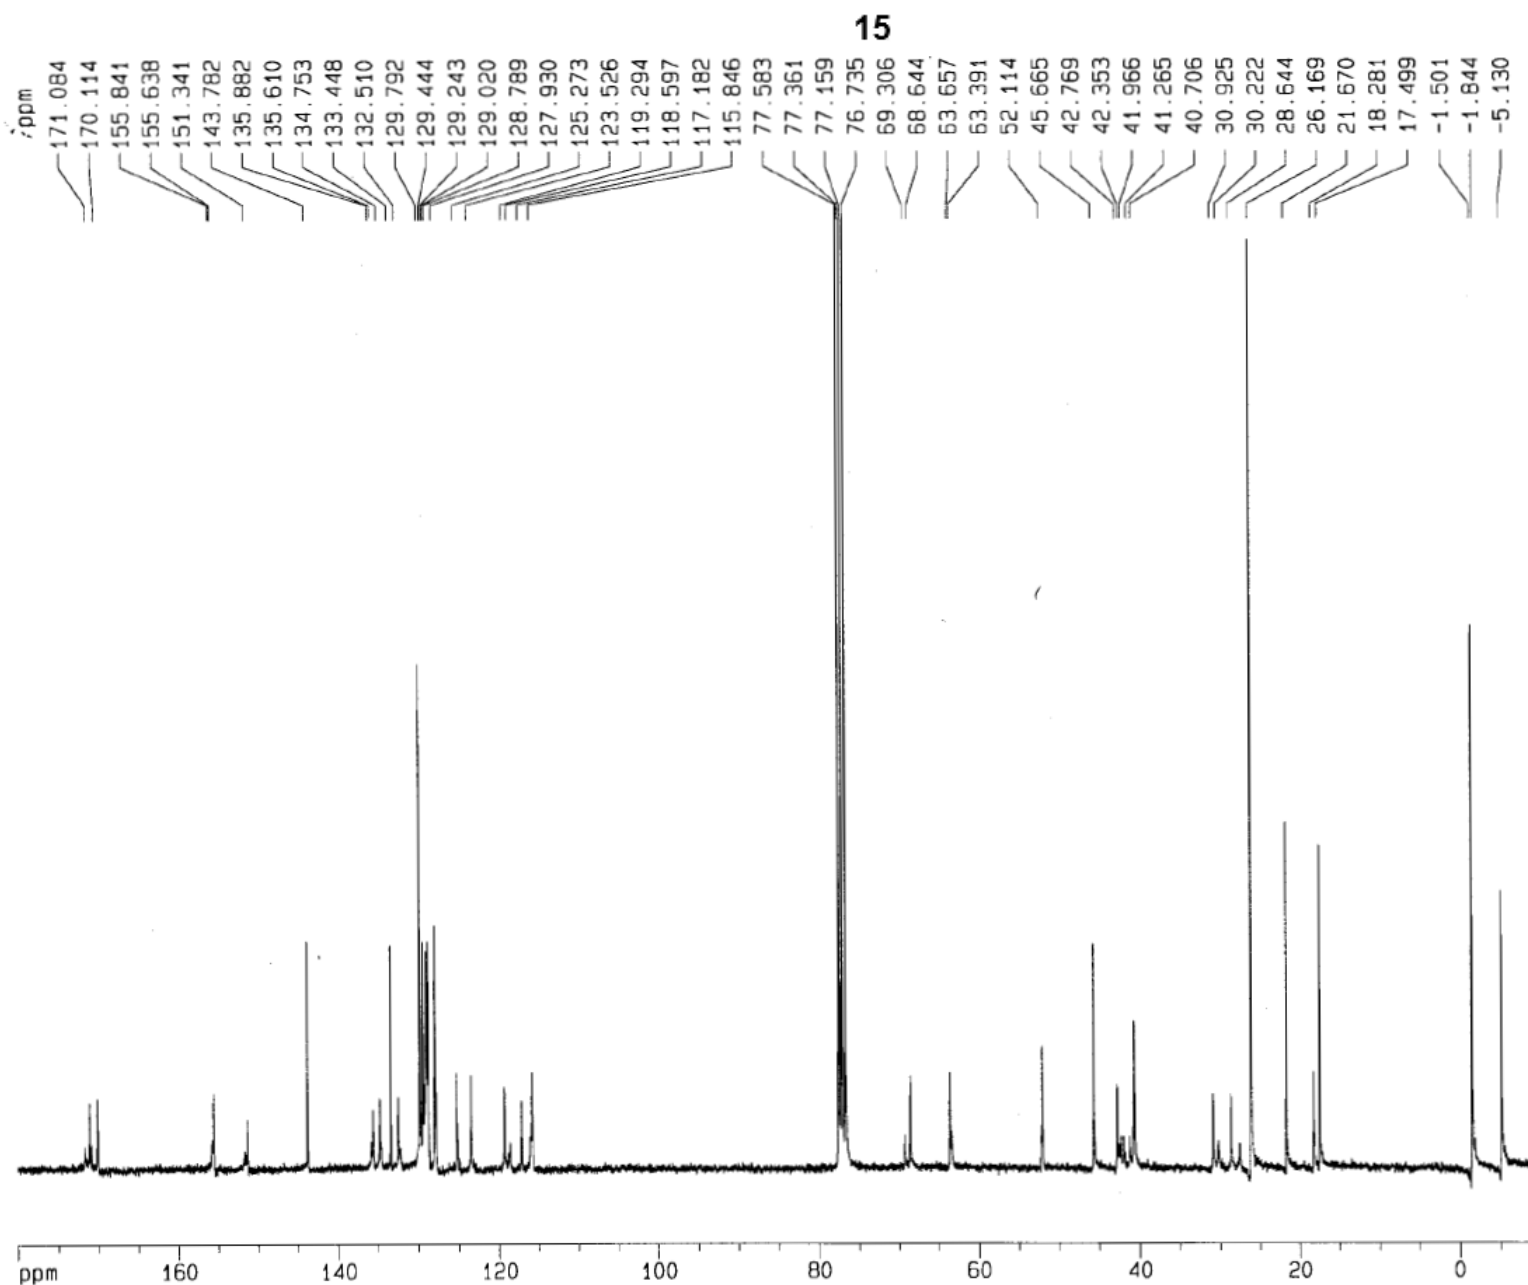

Current Data Parameters  
 NAME 092412FYQ-15  
 EXPNO 1  
 PROCNO 1

F2 - Acquisition Parameters  
 Date\_ 20120925  
 Time 6.27  
 INSTRUM spect  
 PROBHD 5 mm GNP 1H/1  
 PULPROG zgpg30  
 TD 65536  
 SOLVENT CDC13  
 NS 6656  
 DS 4  
 SWH 18796.992 Hz  
 FIDRES 0.286819 Hz  
 AQ 1.7433076 sec  
 RG 1024  
 DW 26.600 usec  
 DE 6.00 usec  
 TE 300.0 K  
 D1 2.0000000 sec  
 D11 0.0300000 sec  
 D12 0.0000200 sec

===== CHANNEL f1 =====  
 NUC1 13C  
 P1 5.25 usec  
 PL1 -6.00 dB  
 SF01 75.4106357 MHz

===== CHANNEL f2 =====  
 CPDPRG2 waltz16  
 NUC2 1H  
 PCPD2 115.00 usec  
 PL2 0.00 dB  
 PL12 19.70 dB  
 PL13 19.70 dB  
 SF02 299.8711995 MHz

F2 - Processing parameters  
 SI 32768  
 SF 75.4023671 MHz  
 WDW EM  
 SSB 0  
 LB 1.00 Hz  
 GB 0  
 PC 1.40

1D NMR plot parameters  
 CX 20.00 cm  
 F1P 180.000 ppm  
 F1 13572.43 Hz  
 F2P -10.000 ppm  
 F2 -754.02 Hz  
 PPMCM 9.50000 ppm/cm  
 HZCM 716.32251 Hz/cm

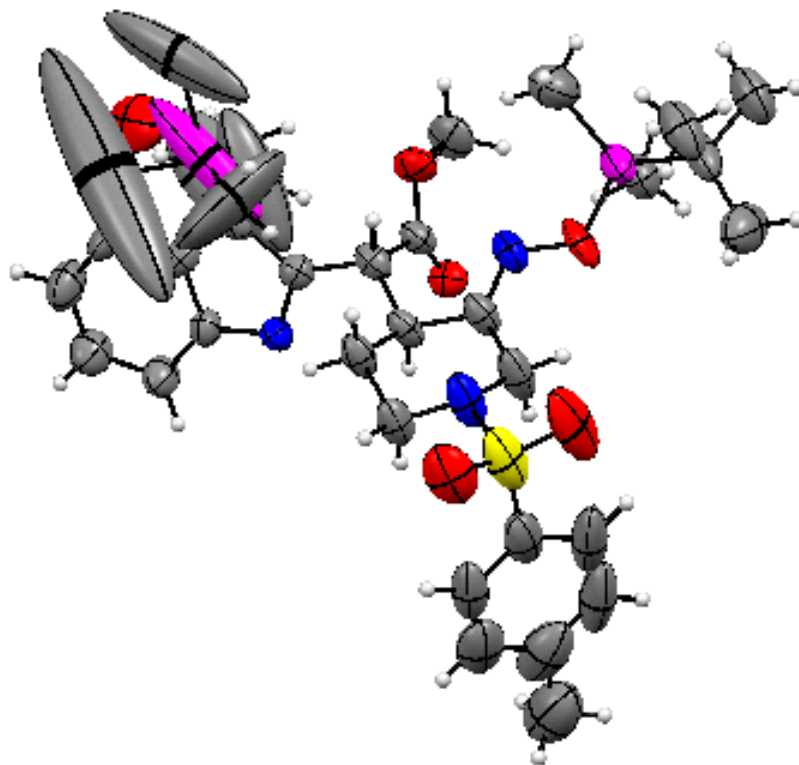

**Fig. 1** ORTEP of *N*-Cbz derivative **15**

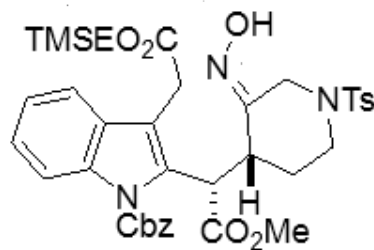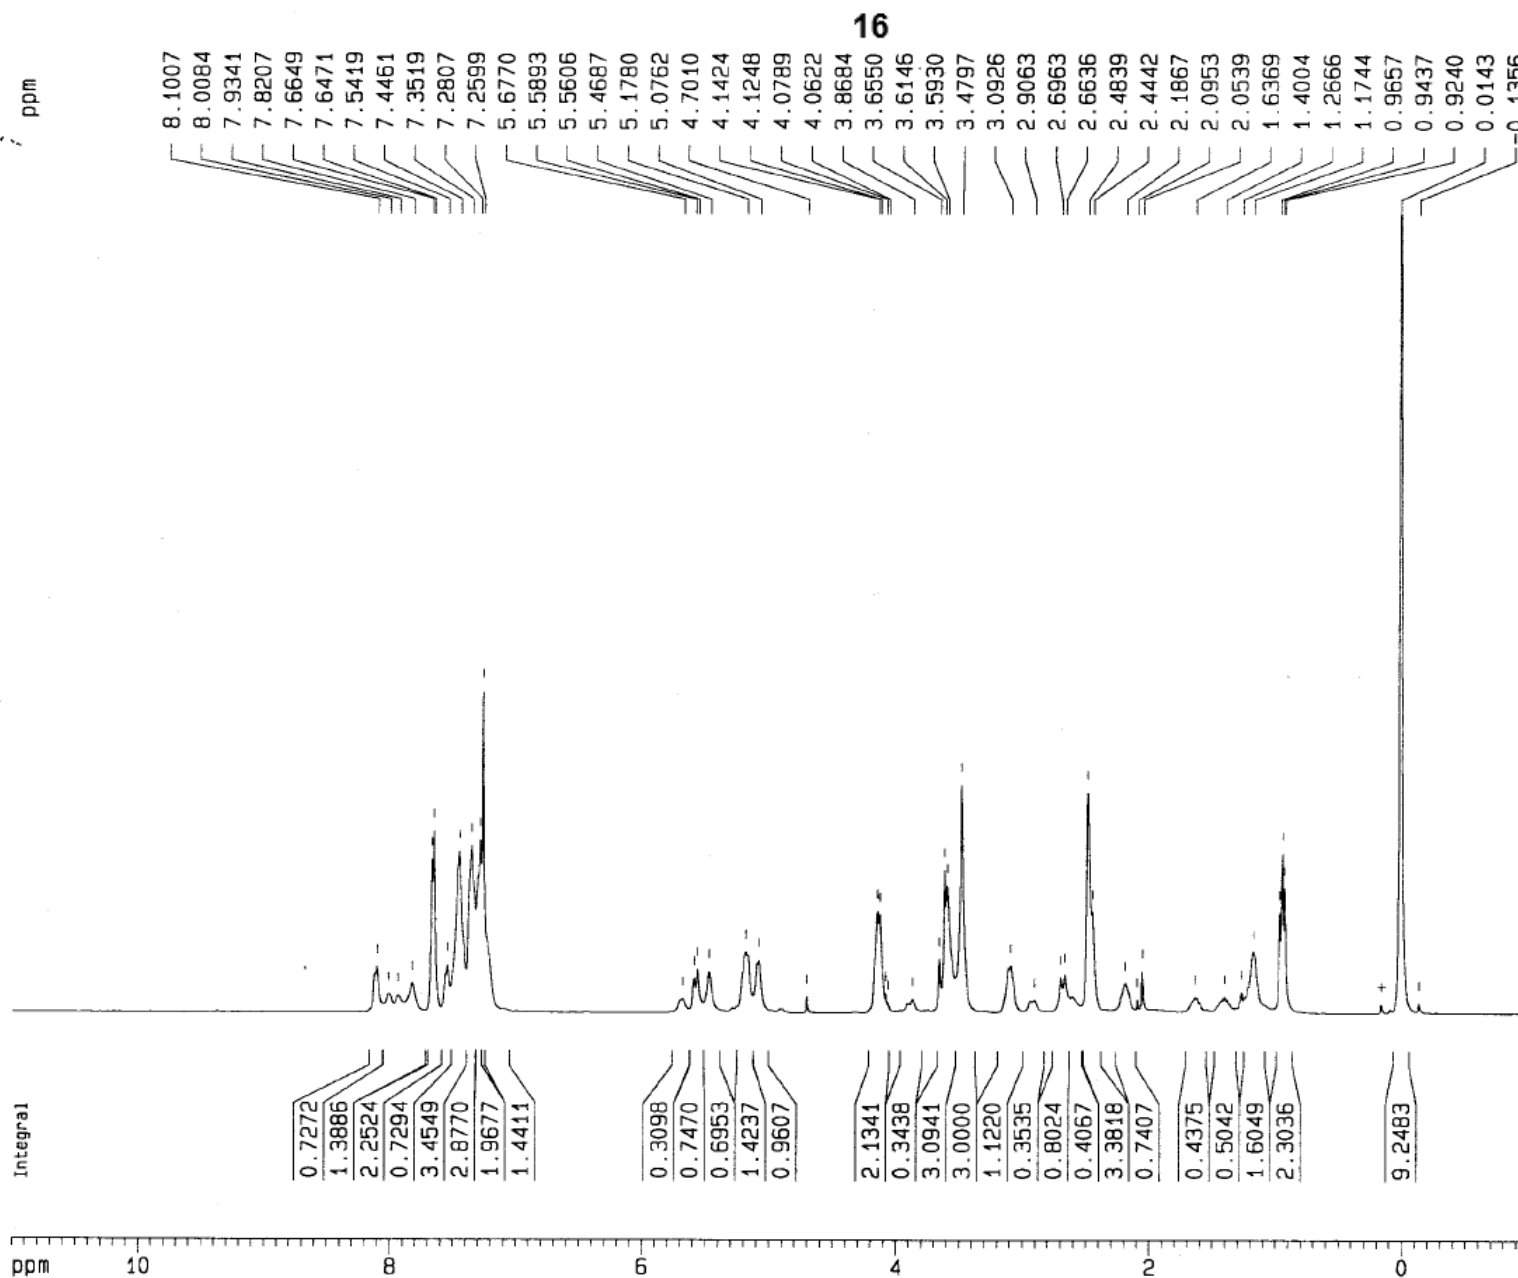

Current Data Parameters  
 NAME 092512FYQ-16  
 EXPNO 1  
 PROCNO 1

F2 - Acquisition Parameters  
 Date\_ 20120925  
 Time 18.29  
 INSTRUM spect  
 PROBHD 5 mm BBI 1H-  
 PULPROG zg30  
 TD 65536  
 SOLVENT CDCl3  
 NS 16  
 DS 2  
 SWH 8278.146 Hz  
 FIDRES 0.126314 Hz  
 AQ 3.9584243 sec  
 RG 50.8  
 DW 60.400 usec  
 DE 6.00 usec  
 TE 300.0 K  
 D1 1.00000000 sec

==== CHANNEL f1 =====  
 NUC1 1H  
 P1 6.45 usec  
 PL1 0.00 dB  
 SF01 400.1324710 MHz

F2 - Processing parameters  
 SI 32768  
 SF 400.1300096 MHz  
 WDW EM  
 SSB 0  
 LB 0.30 Hz  
 GB 0  
 PC 1.00

1D NMR plot parameters  
 CX 20.00 cm  
 F1P 11.000 ppm  
 F1 4401.43 Hz  
 F2P -1.000 ppm  
 F2 -400.13 Hz  
 PPMCM 0.60000 ppm/cm  
 HZCM 240.07800 Hz/cm

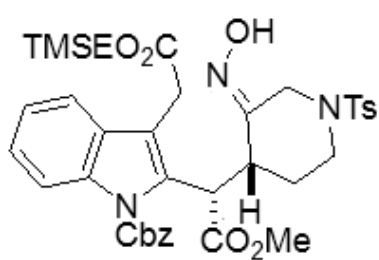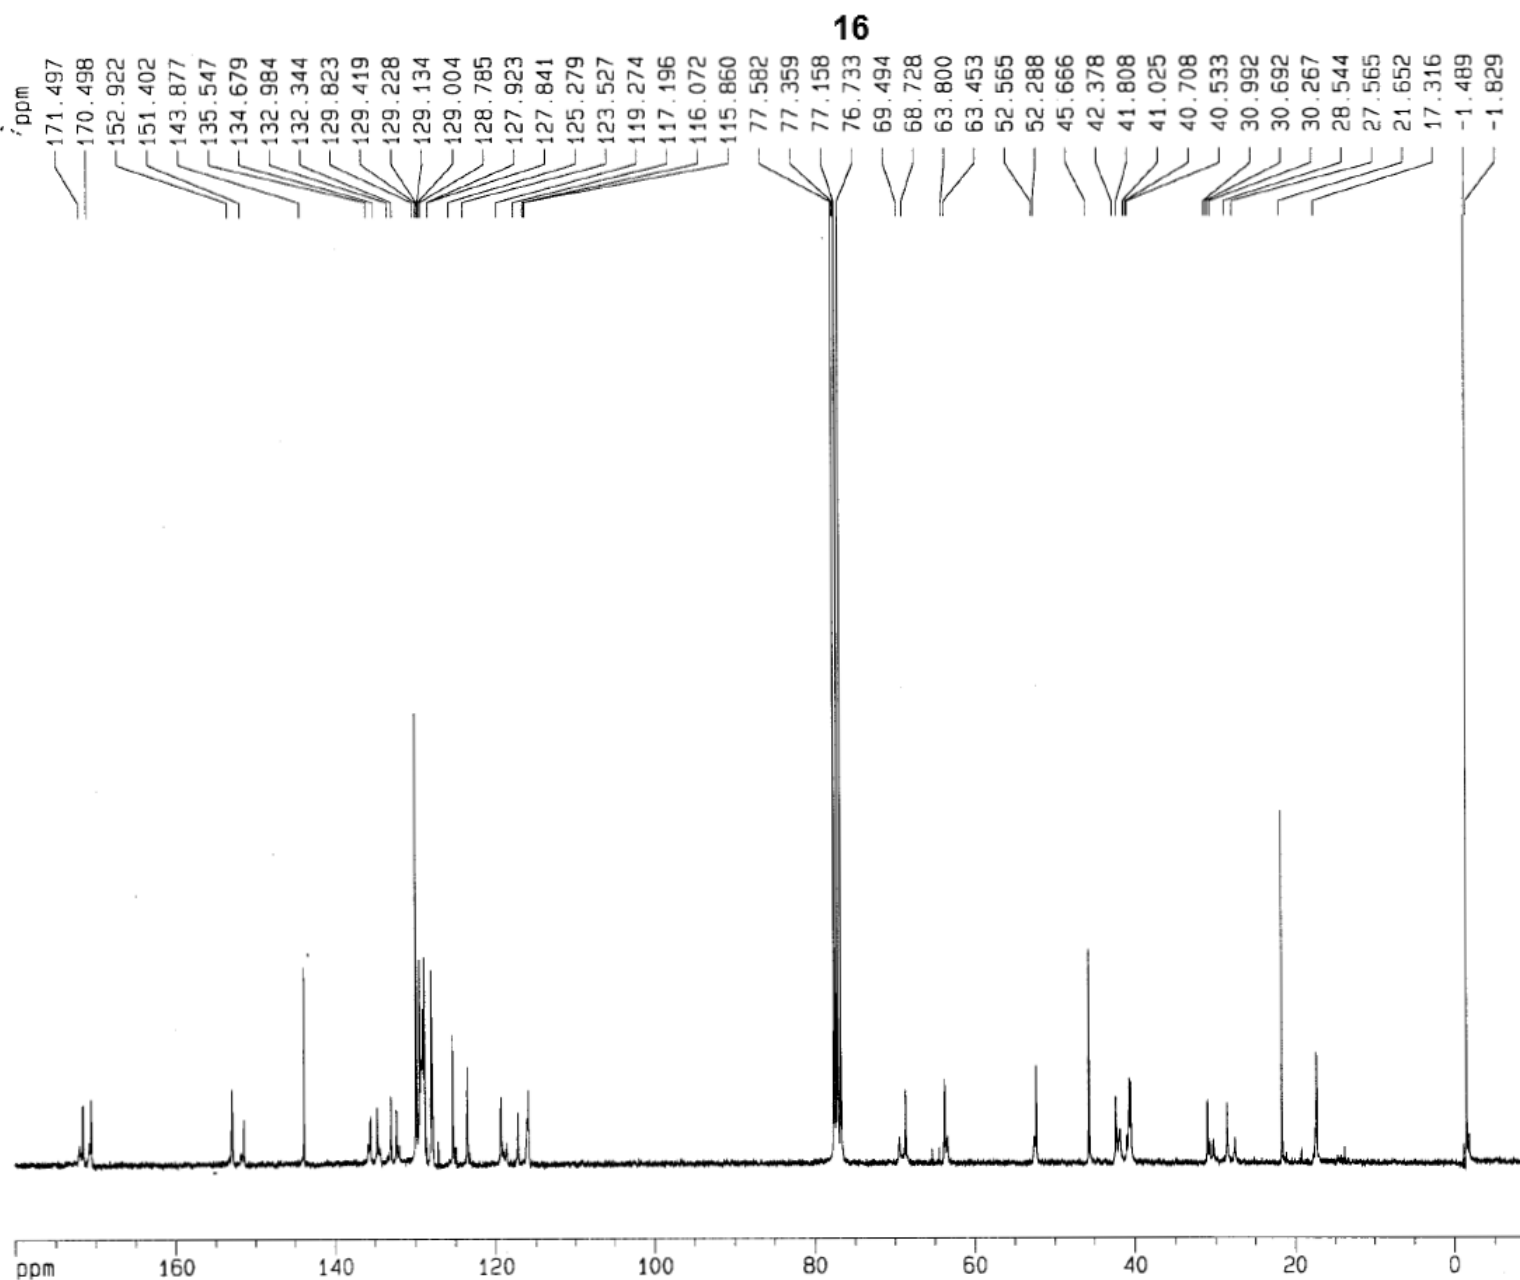

Current Data Parameters  
 NAME 092512FYG-16  
 EXPNO 1  
 PROCNO 1

F2 - Acquisition Parameters  
 Date\_ 20120926  
 Time 7.49  
 INSTRUM spect  
 PROBHD 5 mm QNP 1H/1  
 PULPROG zgpg30  
 TD 65536  
 SOLVENT CDCl3  
 NS 8192  
 DS 4  
 SWH 18796.992 Hz  
 FIDRES 0.286819 Hz  
 AQ 1.7433076 sec  
 RG 4096  
 DW 26.600 usec  
 DE 6.00 usec  
 TE 300.0 K  
 D1 2.00000000 sec  
 D11 0.03000000 sec  
 D12 0.00002000 sec

----- CHANNEL f1 -----  
 NUC1 13C  
 P1 5.25 usec  
 PL1 -6.00 dB  
 SFO1 75.4106357 MHz

----- CHANNEL f2 -----  
 CPDPRG2 waltz16  
 NUC2 1H  
 PCPD2 115.00 usec  
 PL2 0.00 dB  
 PL12 19.70 dB  
 PL13 19.70 dB  
 SFO2 299.8711995 MHz

F2 - Processing parameters  
 SI 32768  
 SF 75.4023694 MHz  
 WDW EM  
 SSB 0  
 LB 1.00 Hz  
 GB 0  
 PC 1.40

1D NMR plot parameters  
 CX 20.00 cm  
 F1P 180.000 ppm  
 F1 13572.43 Hz  
 F2P -10.000 ppm  
 F2 -754.02 Hz  
 PPMCM 9.50000 ppm/cm  
 HZCM 716.32251 Hz/cm

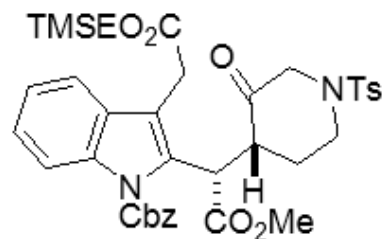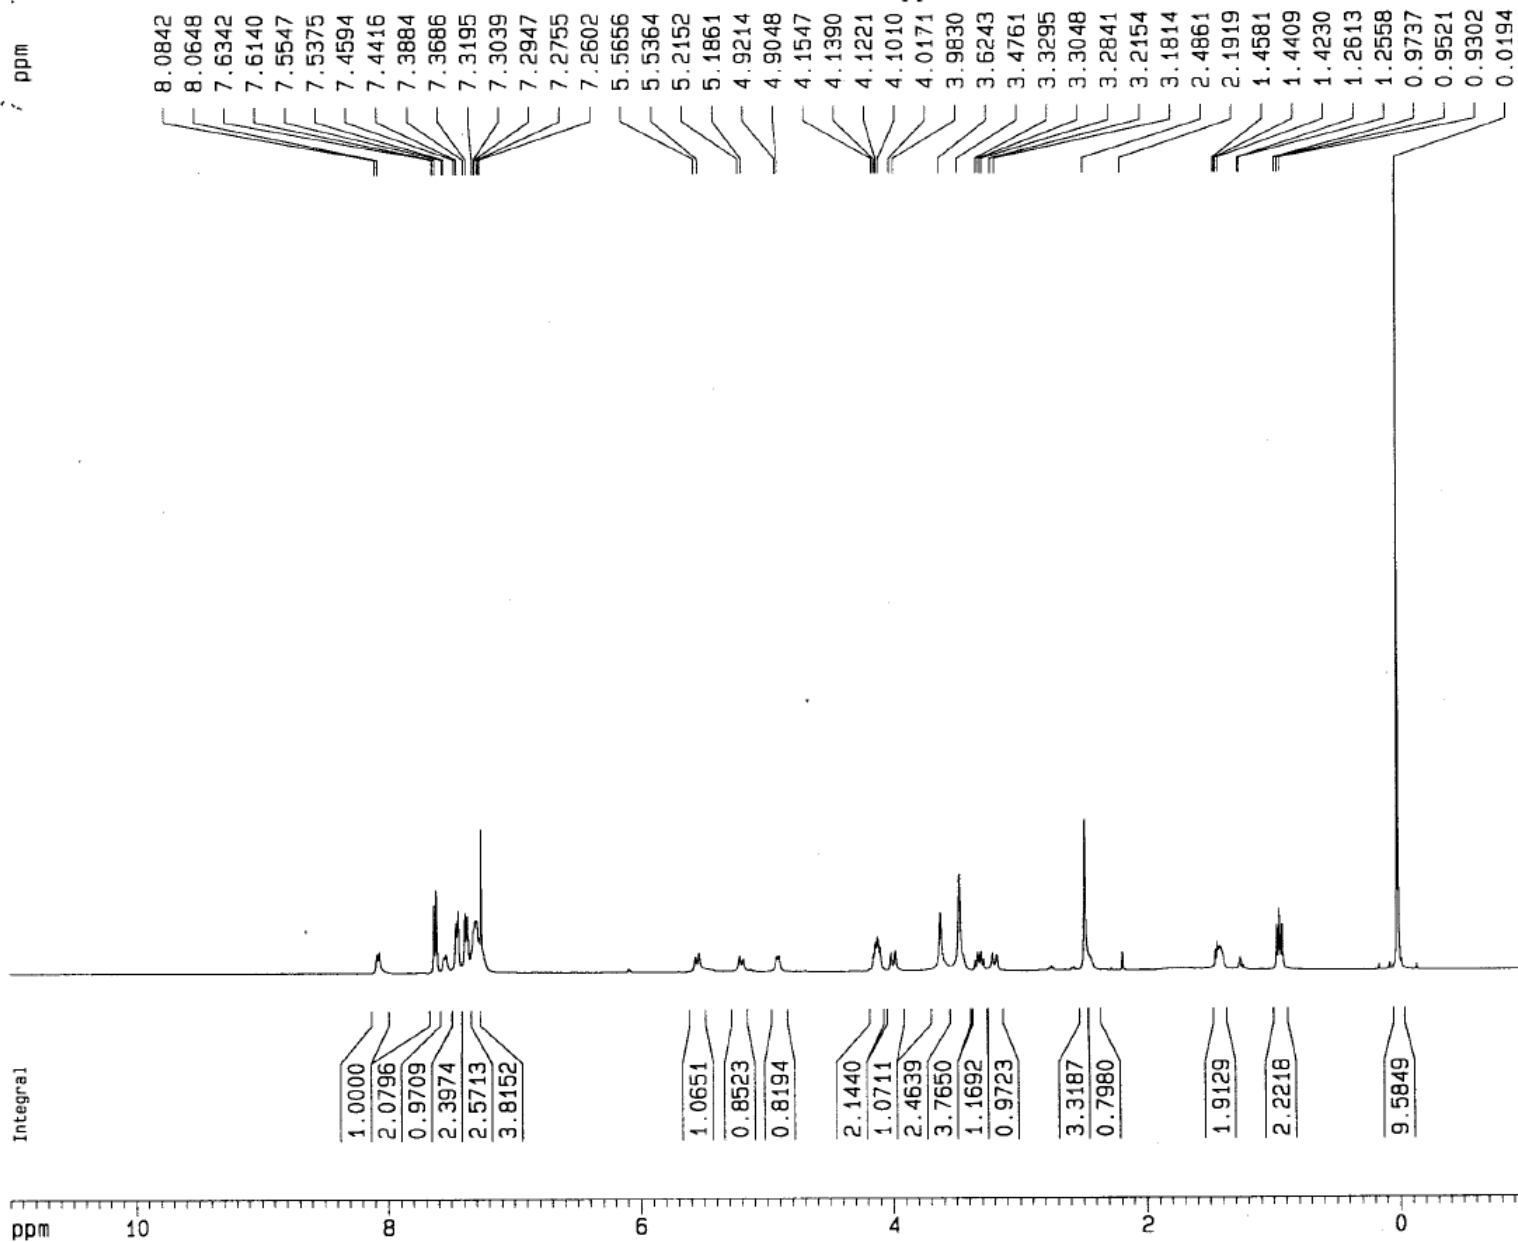

Current Data Parameters  
 NAME 092612FYQ-17  
 EXPNO 1  
 PROCNO 1

## F2 - Acquisition Parameters

Date\_ 20120926  
 Time 9.06  
 INSTRUM spect  
 PROBHD 5 mm BBI 1H-  
 PULPROG zg30  
 TD 65536  
 SOLVENT CDC13  
 NS 16  
 DS 2  
 SWH 8278.146 Hz  
 FIDRES 0.126314 Hz  
 AQ 3.9584243 sec  
 RG 114  
 DW 60.400 usec  
 DE 6.00 usec  
 TE 300.0 K  
 D1 1.00000000 sec

## ===== CHANNEL f1 =====

NUC1 1H  
 P1 6.45 usec  
 PL1 0.00 dB  
 SF01 400.1324710 MHz

## F2 - Processing parameters

SI 32768  
 SF 400.1300091 MHz  
 WDW EM  
 SSB 0  
 LB 0.30 Hz  
 GB 0  
 PC 1.00

## 1D NMR plot parameters

CX 20.00 cm  
 F1P 11.000 ppm  
 F1 4401.43 Hz  
 F2P -1.000 ppm  
 F2 -400.13 Hz  
 PPMCM 0.60000 ppm/cm  
 HZCM 240.07800 Hz/cm



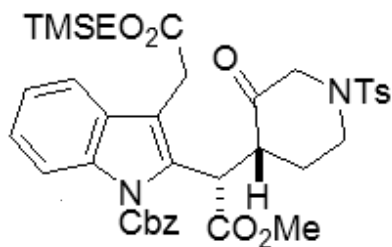

17

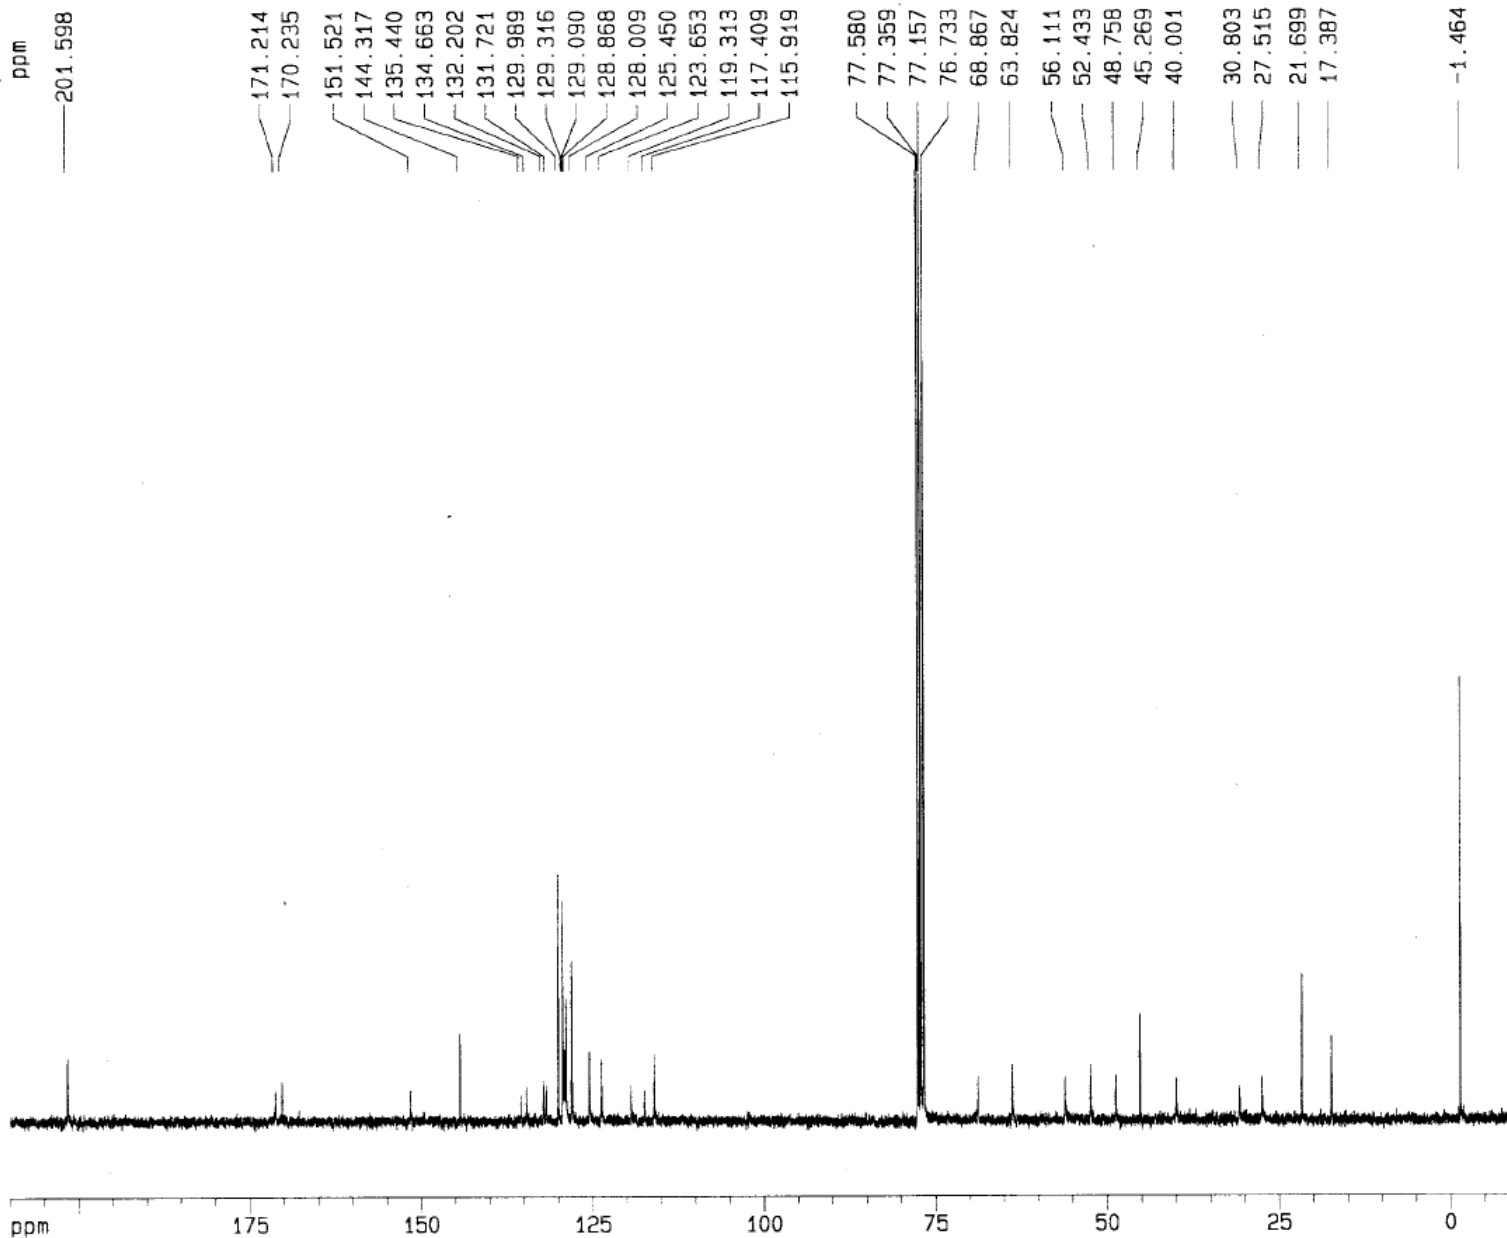

Current Data Parameters  
 NAME 092512FYG-17  
 EXPNO 2  
 PROCNO 1

F2 - Acquisition Parameters  
 Date\_ 20120925  
 Time 21.56  
 INSTRUM spect  
 PROBHD 5 mm Multinu  
 PULPROG zgpg30  
 TD 65536  
 SOLVENT CDCl3  
 NS 1024  
 DS 4  
 SWH 18832.393 Hz  
 FIDRES 0.287360 Hz  
 AQ 1.7400308 sec  
 RG 13004  
 DW 26.550 usec  
 DE 6.00 usec  
 TE 300.0 K  
 D1 2.0000000 sec  
 d11 0.0300000 sec  
 d12 0.0002000 sec

===== CHANNEL f1 =====  
 NUC1 13C  
 P1 9.75 usec  
 PL1 0.00 dB  
 SF01 75.4760200 MHz

===== CHANNEL f2 =====  
 CPDPRG2 waltz16  
 NUC2 1H  
 PCPD2 110.00 usec  
 PL2 0.00 dB  
 PL12 17.50 dB  
 PL13 17.50 dB  
 SF02 300.1312005 MHz

F2 - Processing parameters  
 SI 32768  
 SF 75.4677428 MHz  
 WDW EM  
 SSB 0  
 LB 1.00 Hz  
 GB 0  
 PC 1.40

1D NMR plot parameters  
 CX 20.00 cm  
 F1P 210.000 ppm  
 F1 15848.23 Hz  
 F2P -10.000 ppm  
 F2 -754.68 Hz  
 PPMCM 11.00000 ppm/cm  
 HZCM 830.14514 Hz/cm

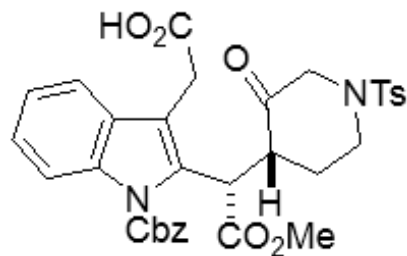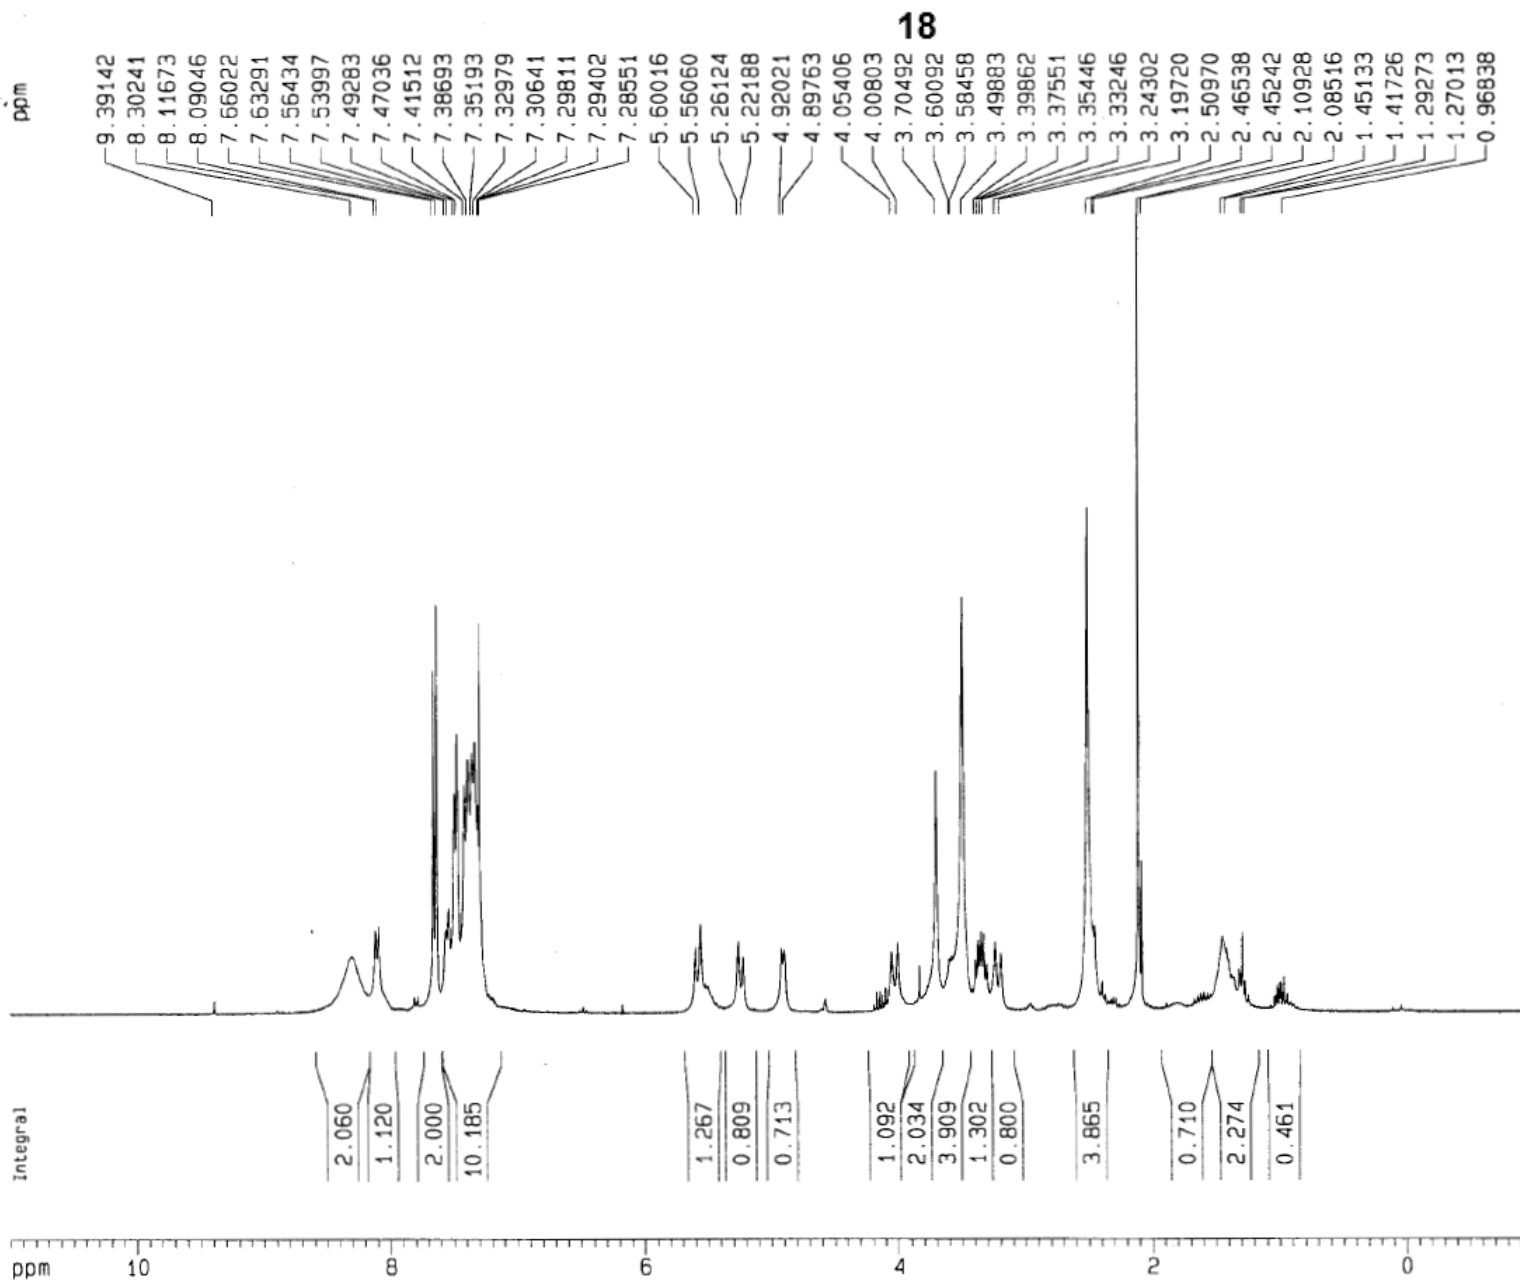

Current Data Parameters  
 NAME 032310mm5085  
 EXPNO 1  
 PROCNO 1

F2 - Acquisition Parameters  
 Date\_ 20100323  
 Time 6.57  
 INSTRUM spect  
 PROBHD 5 mm QNP 1H/1  
 PULPROG zg30  
 TD 24690  
 SOLVENT CDC13  
 NS 16  
 DS 2  
 SWH 6172.839 Hz  
 FIDRES 0.250014 Hz  
 AQ 1.9999400 sec  
 RG 228.1  
 DW 81.000 usec  
 DE 6.00 usec  
 TE 300.0 K  
 D1 1.00000000 sec

===== CHANNEL f1 =====  
 NUC1 1H  
 P1 11.70 usec  
 PL1 0.00 dB  
 SFO1 299.8718518 MHz

F2 - Processing parameters  
 SI 32768  
 SF 299.8700000 MHz  
 WDW no  
 SSB 0  
 LB 0.00 Hz  
 GB 0  
 PC 1.00

1D NMR plot parameters  
 CX 20.00 cm  
 F1P 11.000 ppm  
 F1 3298.57 Hz  
 F2P -1.000 ppm  
 F2 -299.87 Hz  
 PPMCM 0.60000 ppm/cm  
 HZCM 179.92200 Hz/cm

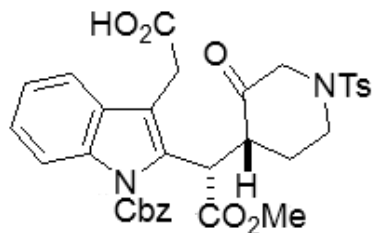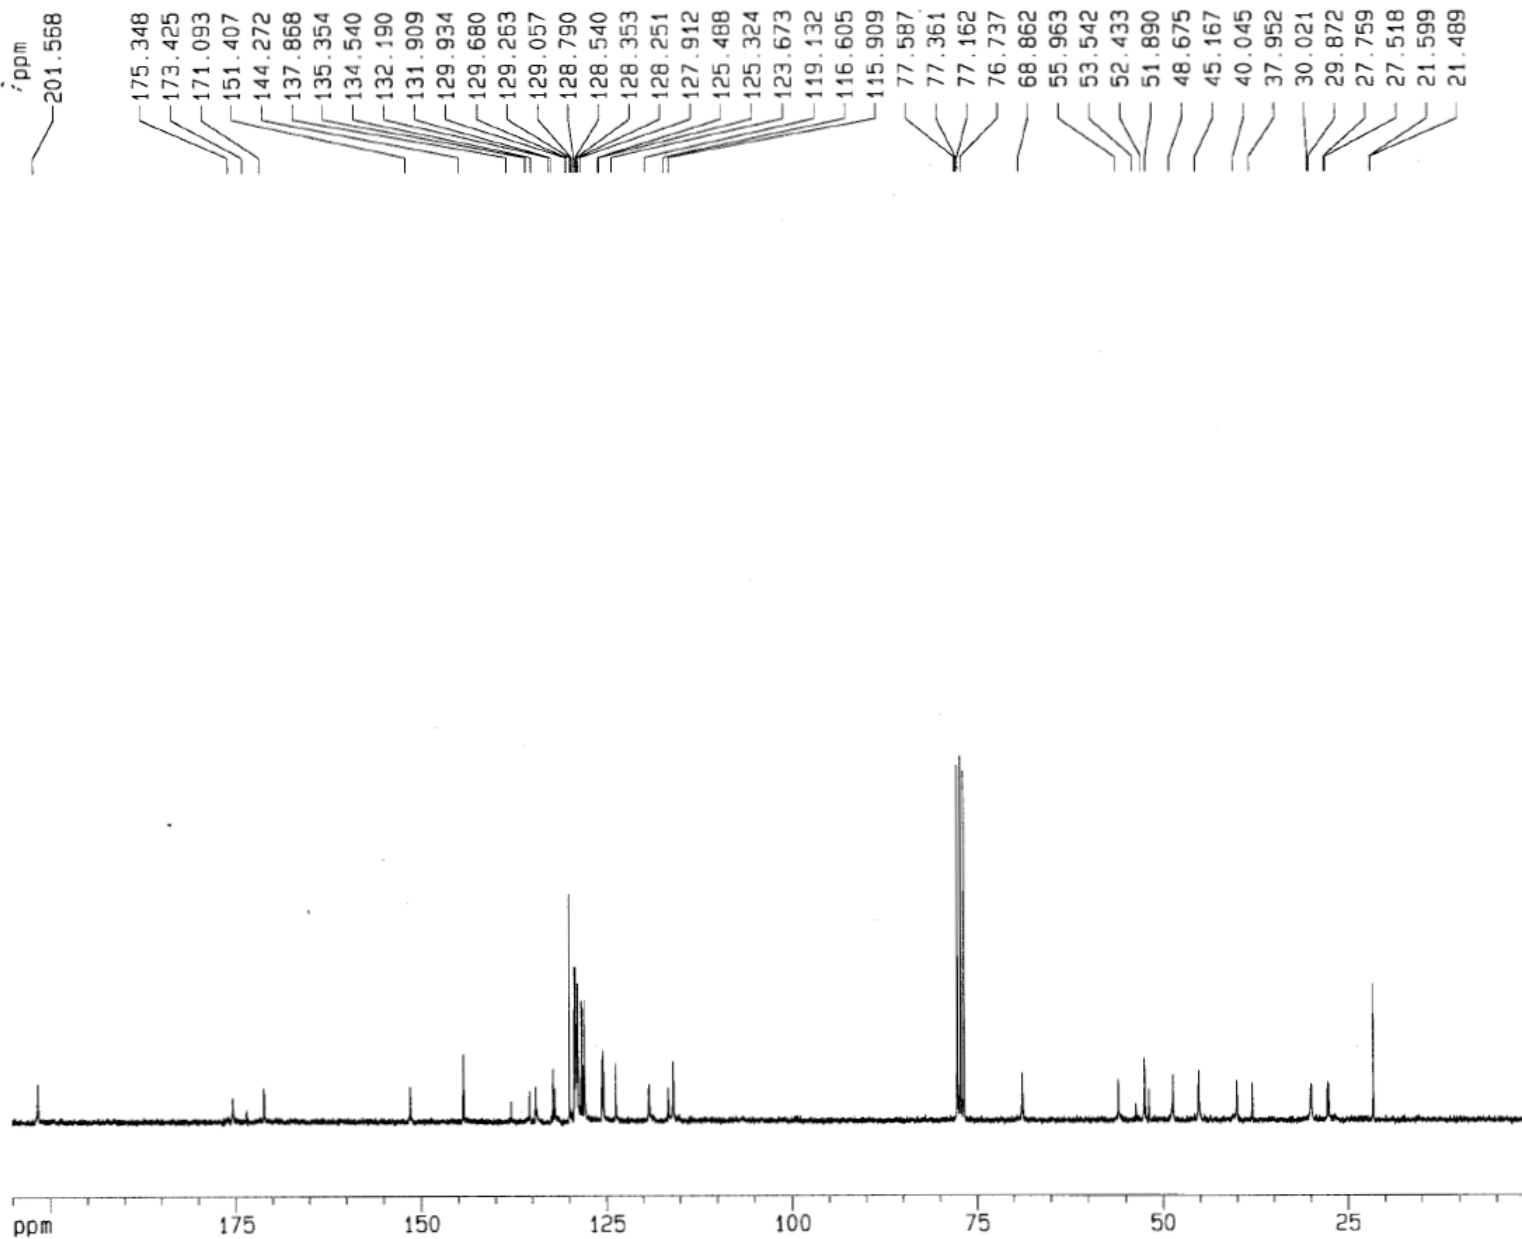

## Current Data Parameters

NAME 092512FYQ-18  
EXPNO 1  
PROCNO 1

## F2 - Acquisition Parameters

Date\_ 20120925  
Time 23.10  
INSTRUM spect  
PROBHD 5 mm GNP 1H/1  
PULPROG zgpg30  
TD 65536  
SOLVENT CDC13  
NS 769  
DS 4  
SWH 18796.992 Hz  
FIDRES 0.286819 Hz  
AQ 1.7433076 sec  
RG 4096  
DW 26.600 usec  
DE 6.00 usec  
TE 300.0 K  
D1 2.00000000 sec  
D11 0.03000000 sec  
D12 0.00002000 sec

----- CHANNEL f1 -----  
NUC1 13C  
P1 5.25 usec  
PL1 -6.00 dB  
SFO1 75.4106357 MHz

----- CHANNEL f2 -----  
CPDPRG2 waltz16  
NUC2 1H  
PCPD2 115.00 usec  
PL2 0.00 dB  
PL12 19.70 dB  
PL13 19.70 dB  
SFO2 299.8711995 MHz

## F2 - Processing parameters

SI 32768  
SF 75.4023746 MHz  
WDW EM  
SSB 0  
LB 1.00 Hz  
GB 0  
PC 1.40

## 1D NMR plot parameters

CX 20.00 cm  
F1P 205.000 ppm  
F1 15457.49 Hz  
F2P 0.000 ppm  
F2 0.00 Hz  
PPMCM 10.25000 ppm/cm  
HZCM 772.87439 Hz/cm

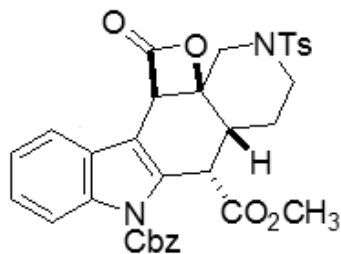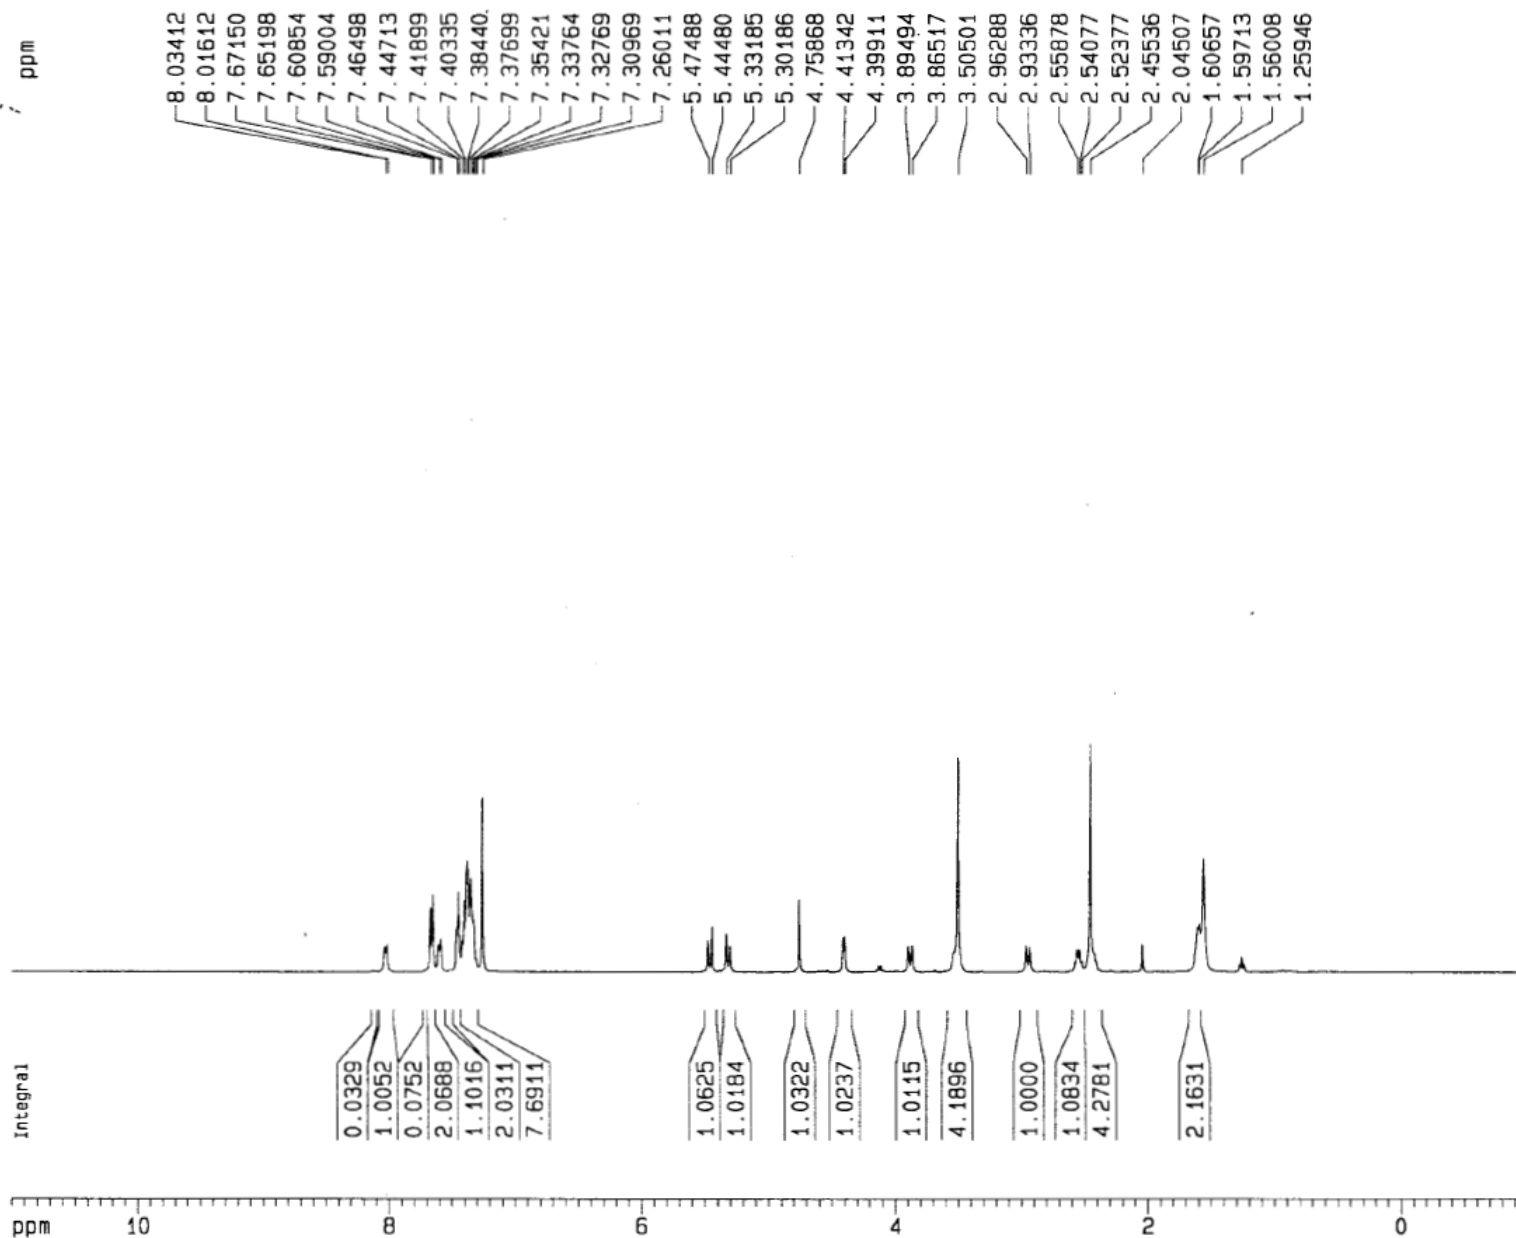

Current Data Parameters  
 NAME 090112FJIV101  
 EXPNO 1  
 PROCNO 1

F2 - Acquisition Parameters  
 Date\_ 20120901  
 Time 8.24  
 INSTRUM spect  
 PROBHD 5 mm BBI 1H-  
 PULPROG zg30  
 TD 65536  
 SOLVENT CDC13  
 NS 16  
 DS 2  
 SWH 8278.146 Hz  
 FIDRES 0.126314 Hz  
 AQ 3.9584243 sec  
 RG 645.1  
 DW 60.400 usec  
 DE 6.00 usec  
 TE 300.0 K  
 D1 1.00000000 sec

===== CHANNEL f1 =====  
 NUC1 1H  
 P1 6.45 usec  
 PL1 0.00 dB  
 SF01 400.1324710 MHz

F2 - Processing parameters  
 SI 32768  
 SF 400.1300094 MHz  
 WDN EM  
 SSB 0  
 LB 0.30 Hz  
 GB 0  
 PC 1.00

1D NMR plot parameters  
 CX 20.00 cm  
 F1P 11.000 ppm  
 F1 4401.43 Hz  
 F2P -1.000 ppm  
 F2 -400.13 Hz  
 PPMCM 0.60000 ppm/cm  
 HZCM 240.07800 Hz/cm

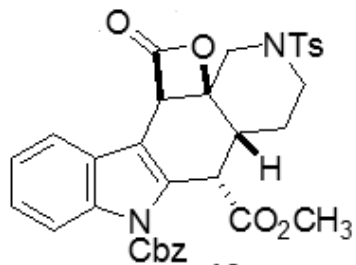

19

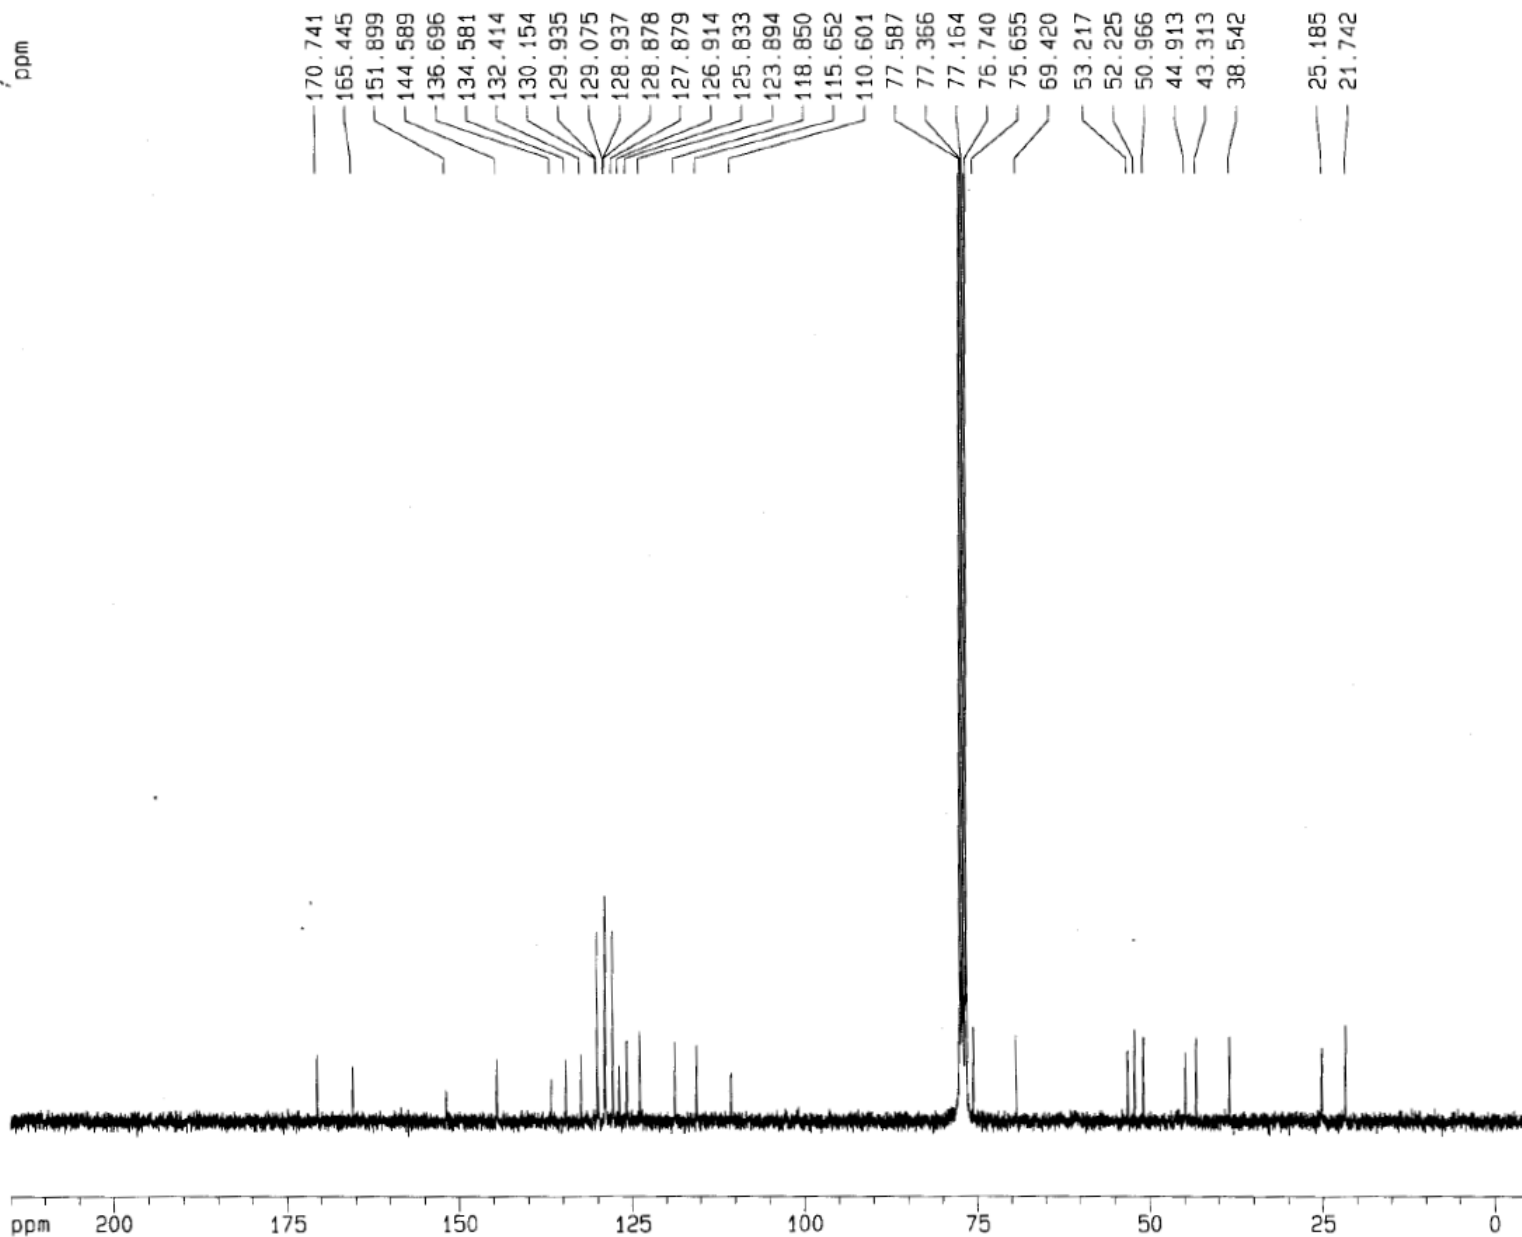

Current Data Parameters  
NAME 092612FY0-19C  
EXPNO 1  
PROCNO 1

F2 - Acquisition Parameters  
Date\_ 20120927  
Time 6.39  
INSTRUM spect  
PROBHD 5 mm QNP 1H/1  
PULPROG zgpg30  
TD 65536  
SOLVENT CDCl3  
NS 7168  
DS 4  
SWH 18796.992 Hz  
FIDRES 0.286819 Hz  
AQ 1.7433076 sec  
RG 812.7  
DW 26.600 usec  
DE 6.00 usec  
TE 300.0 K  
D1 2.00000000 sec  
D11 0.03000000 sec  
D12 0.00002000 sec

----- CHANNEL f1 -----  
NUC1 13C  
P1 5.25 usec  
PL1 -6.00 dB  
SF01 75.4106357 MHz

----- CHANNEL f2 -----  
CPDPRG2 waltz16  
NUC2 1H  
PCPD2 115.00 usec  
PL2 0.00 dB  
PL12 19.70 dB  
PL13 19.70 dB  
SF02 299.8711995 MHz

F2 - Processing parameters  
SI 32768  
SF 75.4023625 MHz  
WDW EM  
SSB 0  
LB 1.00 Hz  
GB 0  
PC 1.40

1D NMR plot parameters  
CX 20.00 cm  
F1P 215.000 ppm  
F1 16211.51 Hz  
F2P -5.000 ppm  
F2 -377.01 Hz  
PPMCM 11.00000 ppm/cm  
HZCM 829.42596 Hz/cm

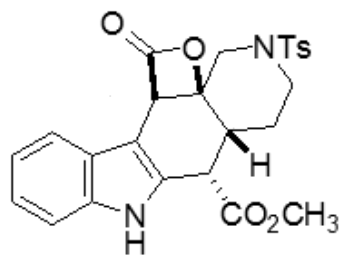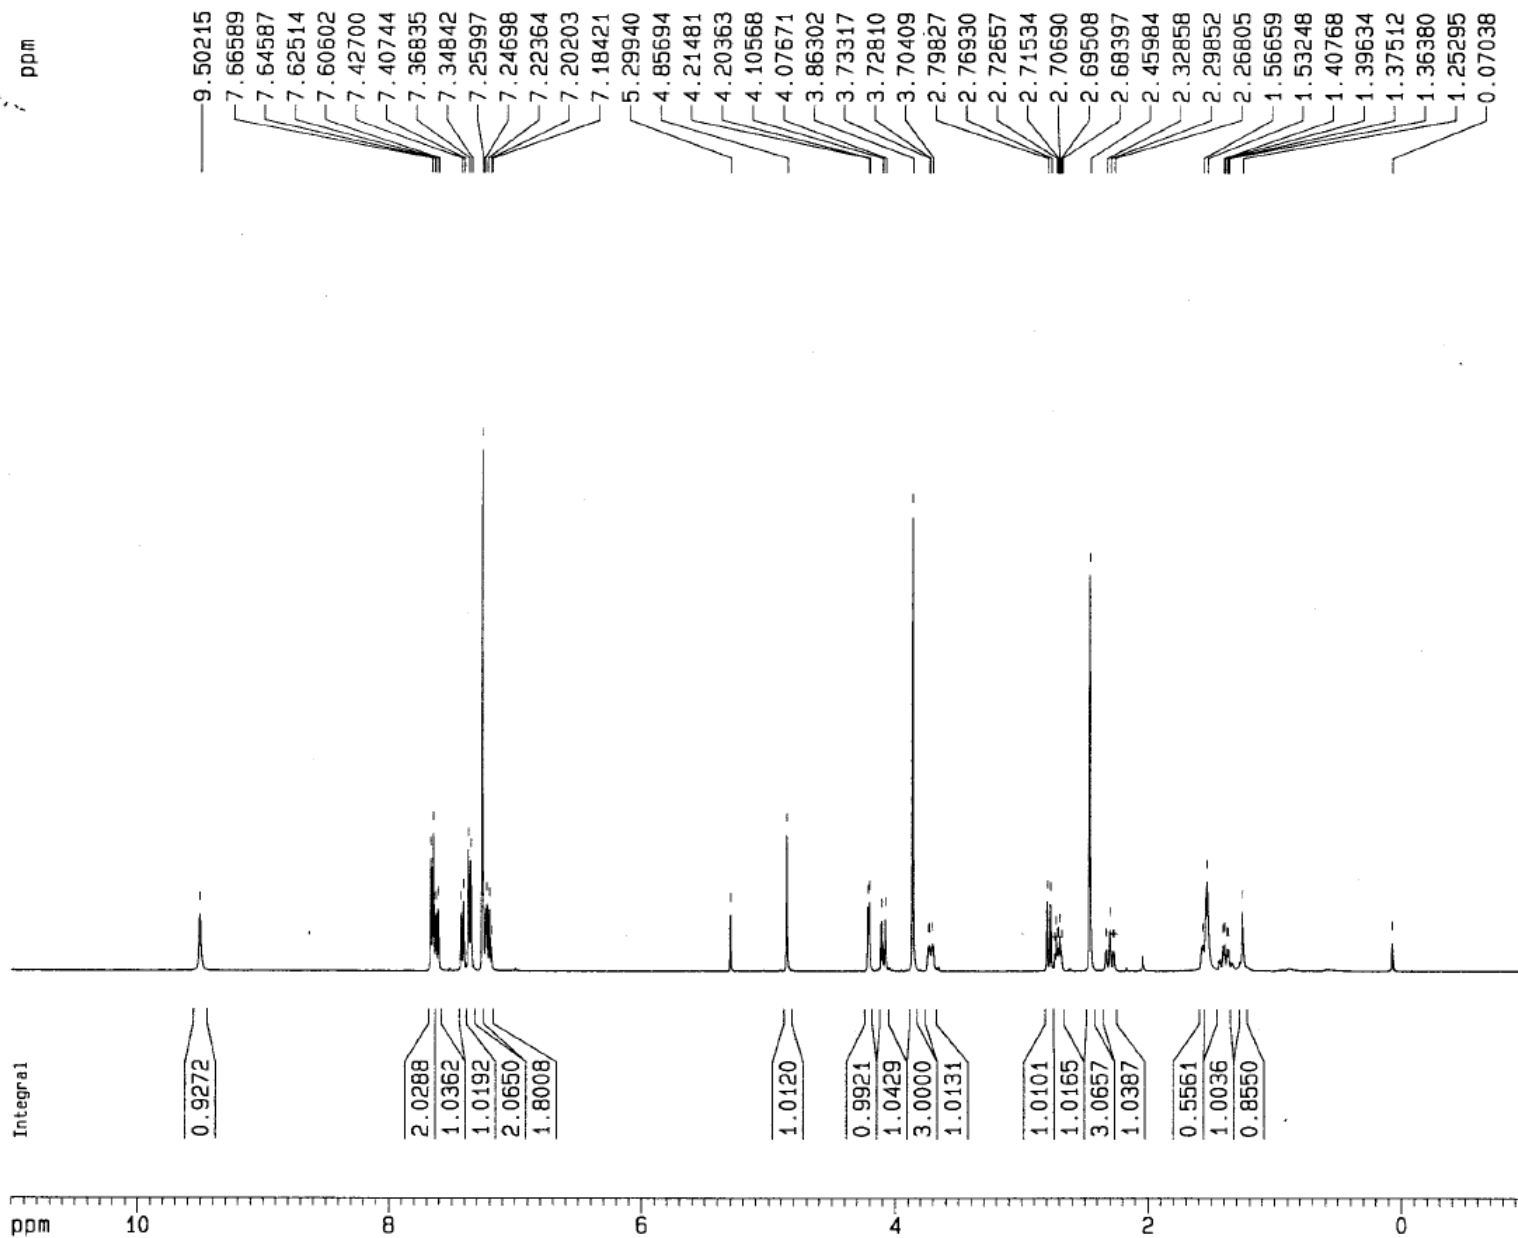

Current Data Parameters  
 NAME 092612FY0-20  
 EXPNO 1  
 PROCNO 1

F2 - Acquisition Parameters  
 Date\_ 20120926  
 Time 22.45  
 INSTRUM spect  
 PROBHD 5 mm BBI 1H-  
 PULPROG zg30  
 TD 65536  
 SOLVENT CDCl3  
 NS 16  
 DS 2  
 SWH 8278.146 Hz  
 FIDRES 0.126314 Hz  
 AQ 3.9584243 sec  
 RG 574.7  
 DW 60.400 usec  
 DE 6.00 usec  
 TE 300.0 K  
 D1 1.00000000 sec

===== CHANNEL f1 =====  
 NUC1 1H  
 P1 6.45 usec  
 PL1 0.00 dB  
 SF01 400.1324710 MHz

F2 - Processing parameters  
 SI 32768  
 SF 400.1300096 MHz  
 WDW EM  
 SSB 0  
 LB 0.30 Hz  
 GB 0  
 PC 1.00

1D NMR plot parameters  
 CX 20.00 cm  
 F1P 11.000 ppm  
 F1 4401.43 Hz  
 F2P -1.000 ppm  
 F2 -400.13 Hz  
 PPMCM 0.60000 ppm/cm  
 HZCM 240.07800 Hz/cm

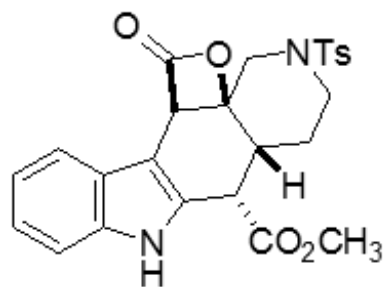

20

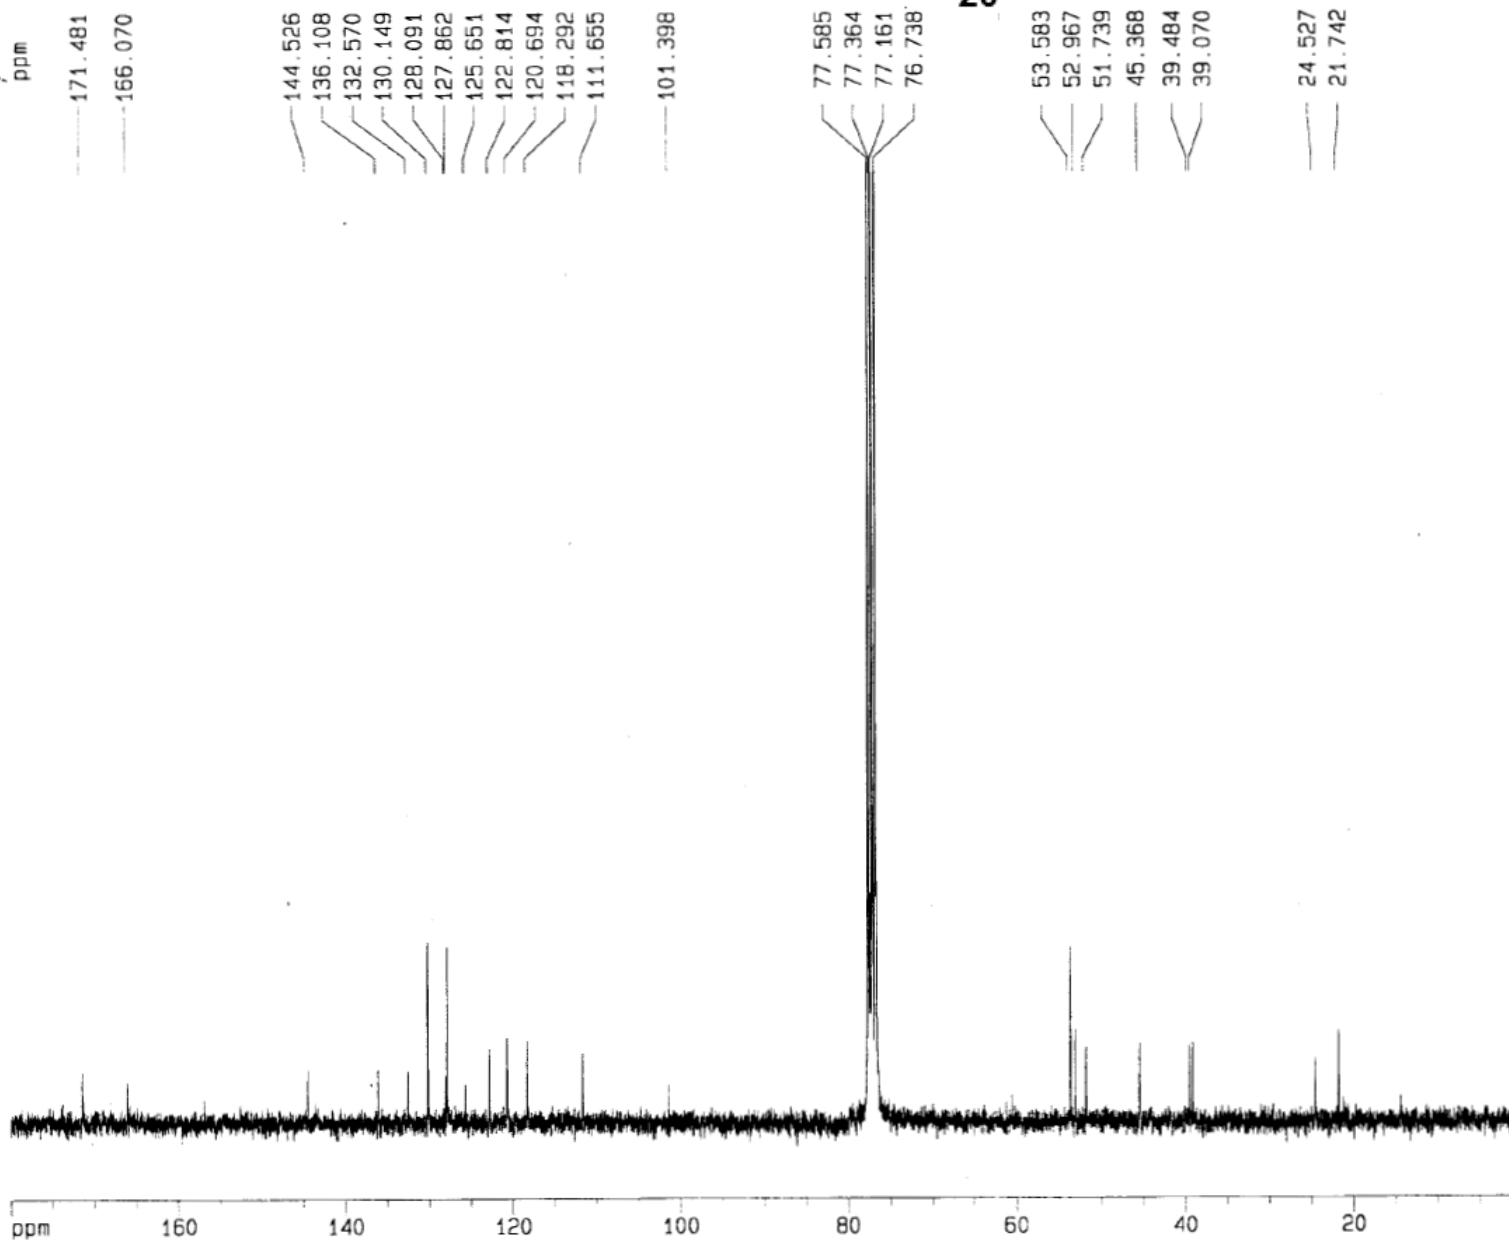

Current Data Parameters  
 NAME 092312FYGcpd20  
 EXPNO 1  
 PROCNO 1

## F2 - Acquisition Parameters

Date\_ 20120924  
 Time 9.30  
 INSTRUM spect  
 PROBHD 5 mm Multinu  
 PULPROG zgpg30  
 TD 65536  
 SOLVENT CDC13  
 NS 19456  
 DS 4  
 SWH 18832.393 Hz  
 FIDRES 0.287360 Hz  
 AQ 1.7400308 sec  
 RG 11585.2  
 DW 26.550 usec  
 DE 6.00 usec  
 TE 300.0 K  
 D1 2.0000000 sec  
 d11 0.0300000 sec  
 d12 0.0000200 sec

----- CHANNEL f1 -----  
 NUC1 13C  
 P1 9.75 usec  
 PL1 0.00 dB  
 SF01 75.4760200 MHz

----- CHANNEL f2 -----  
 CPDPRG2 waltz16  
 NUC2 1H  
 PCPD2 110.00 usec  
 PL2 0.00 dB  
 PL12 17.50 dB  
 PL13 17.50 dB  
 SF02 300.1312005 MHz

## F2 - Processing parameters

SI 32768  
 SF 75.4677382 MHz  
 WDW EM  
 SSB 0  
 LB 1.00 Hz  
 GB 0  
 PC 1.40

## 1D NMR plot parameters

CX 20.00 cm  
 F1P 180.000 ppm  
 F1 13584.19 Hz  
 F2P 0.000 ppm  
 F2 0.00 Hz  
 PPNCM 9.00000 ppm/cm  
 HZCM 679.20959 Hz/cm

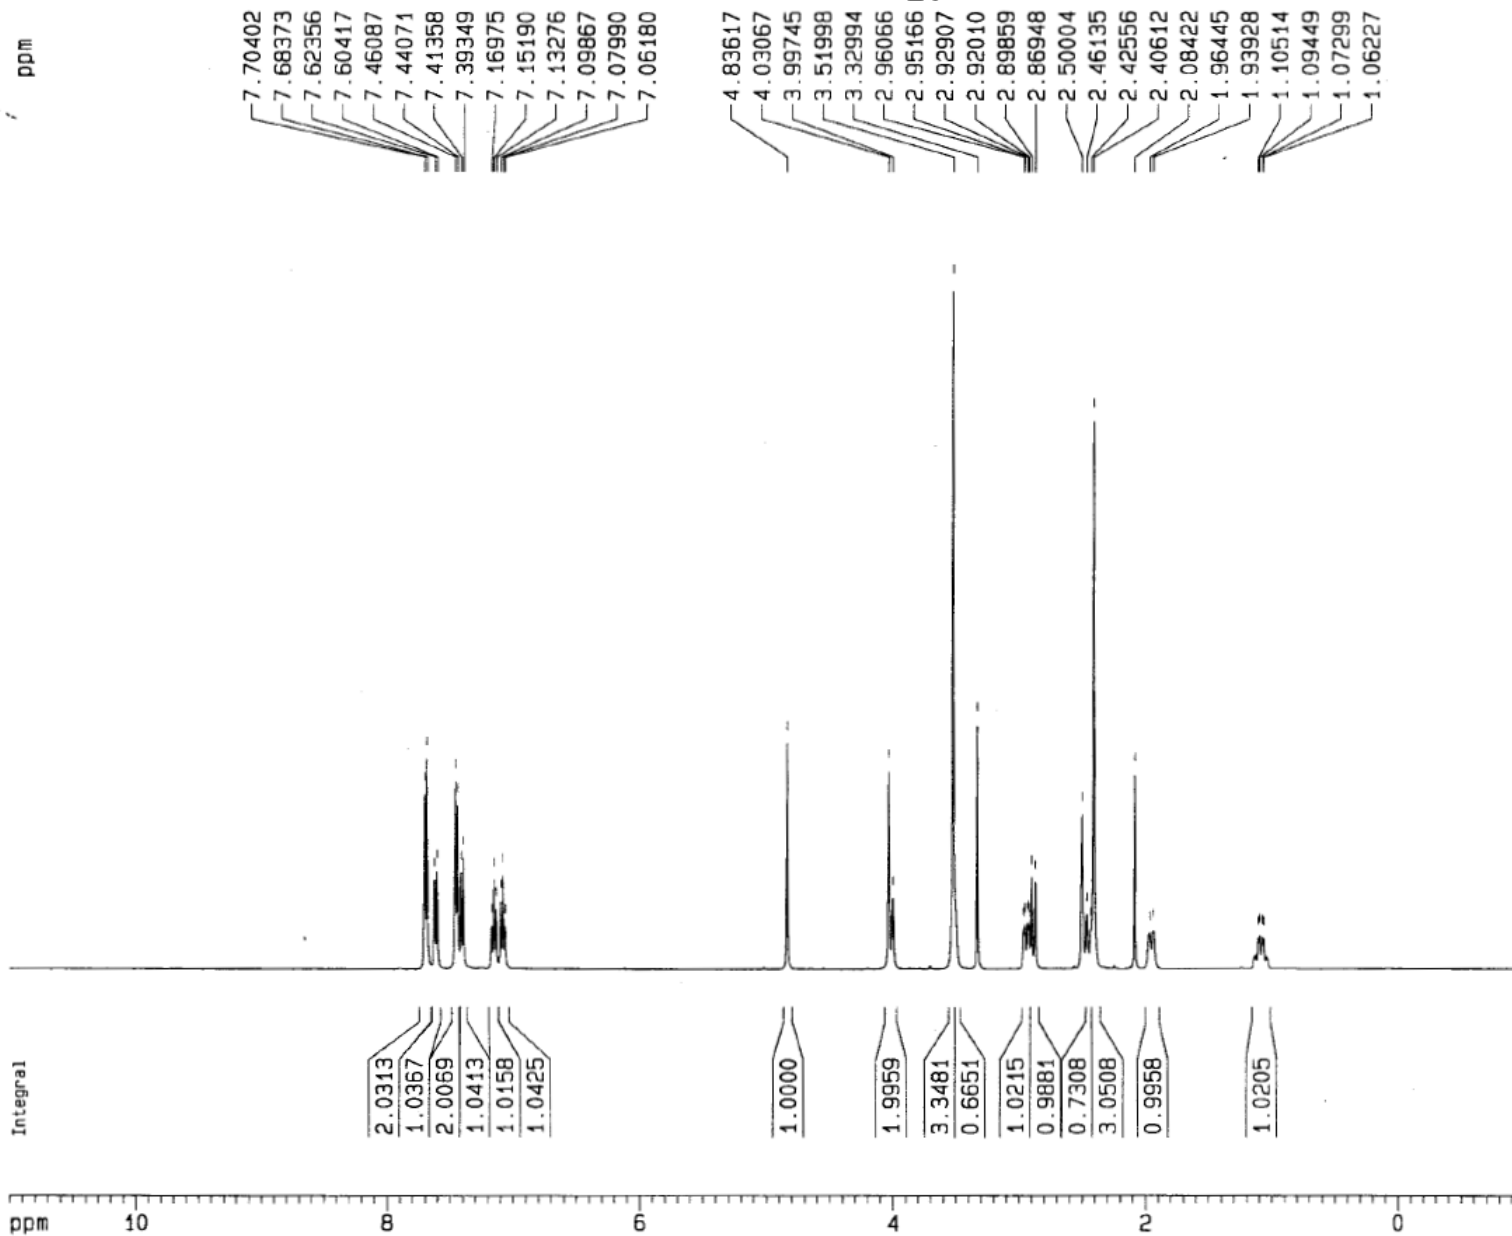

## Current Data Parameters

NAME 092612FYQ-21  
EXPNO 5  
PROCNO 1

## F2 - Acquisition Parameters

Date\_ 20120926  
Time 23.04  
INSTRUM spect  
PROBHD 5 mm BBI 1H-  
PULPROG zg30  
TD 65536  
SOLVENT DMSO  
NS 16  
DS 2  
SWH 8278.146 Hz  
FIDRES 0.126314 Hz  
AQ 3.9584243 sec  
RG 362  
DW 60.400 usec  
DE 6.00 usec  
TE 300.0 K  
D1 1.00000000 sec

## ----- CHANNEL f1 -----

NUC1 1H  
P1 6.45 usec  
PL1 0.00 dB  
SF01 400.1324710 MHz

## F2 - Processing parameters

SI 32768  
SF 400.1300029 MHz  
WDW EM  
SSB 0  
LB 0.30 Hz  
GB 0  
PC 1.00

## 1D NMR plot parameters

CX 20.00 cm  
F1P 11.000 ppm  
F1 4401.43 Hz  
F2P -1.000 ppm  
F2 -400.13 Hz  
PPMCM 0.60000 ppm/cm  
HZCM 240.07800 Hz/cm



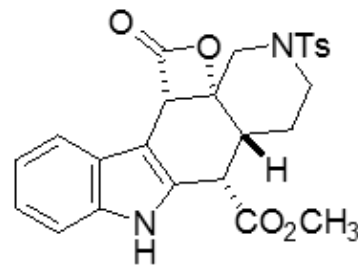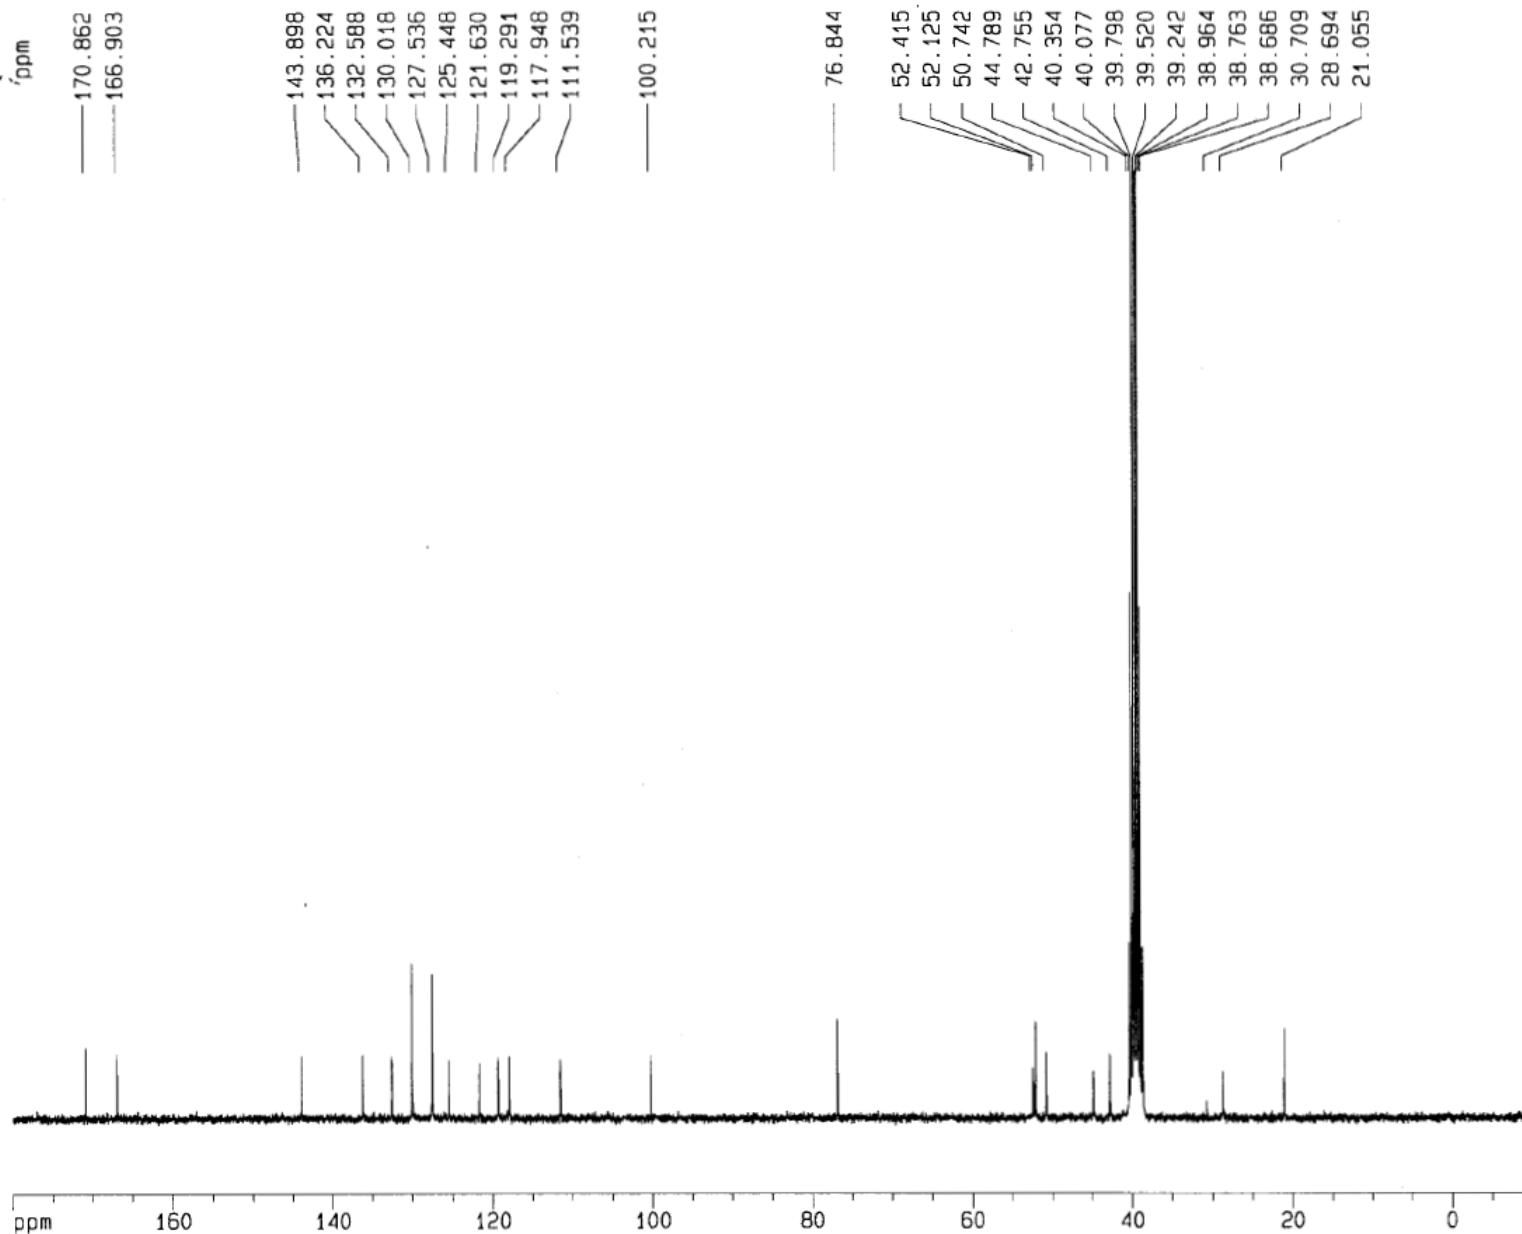

## Current Data Parameters

NAME 092612FYQ-21  
EXPNO 2  
PROCNO 1

## F2 - Acquisition Parameters

Date\_ 20120926  
Time 23.03  
INSTRUM spect  
PROBHD 5 mm GNP 1H/1  
PULPROG zgpg30  
TD 65536  
SOLVENT DMSO  
NS 1375  
DS 4  
SWH 18796.992 Hz  
FIDRES 0.286819 Hz  
AQ 1.7433076 sec  
RG 512  
DW 26.600 usec  
DE 6.00 usec  
TE 300.0 K  
D1 2.0000000 sec  
D11 0.0300000 sec  
D12 0.0000200 sec

## ===== CHANNEL f1 =====

NUC1 13C  
P1 5.25 usec  
PL1 -6.00 dB  
SFO1 75.4106357 MHz

## ===== CHANNEL f2 =====

CPDPRG2 waltz16  
NUC2 1H  
PCPD2 115.00 usec  
PL2 0.00 dB  
PL12 19.70 dB  
PL13 19.70 dB  
SFO2 299.8711995 MHz

## F2 - Processing parameters

SI 32768  
SF 75.4024070 MHz  
WDW EM  
SSB 0  
LB 1.00 Hz  
GB 0  
PC 1.40

## 1D NMR plot parameters

CX 20.00 cm  
F1P 180.000 ppm  
F1 13572.43 Hz  
F2P -10.000 ppm  
F2 -754.02 Hz  
PPMCM 9.50000 ppm/cm  
HZCM 716.32288 Hz/cm

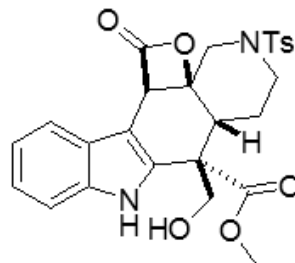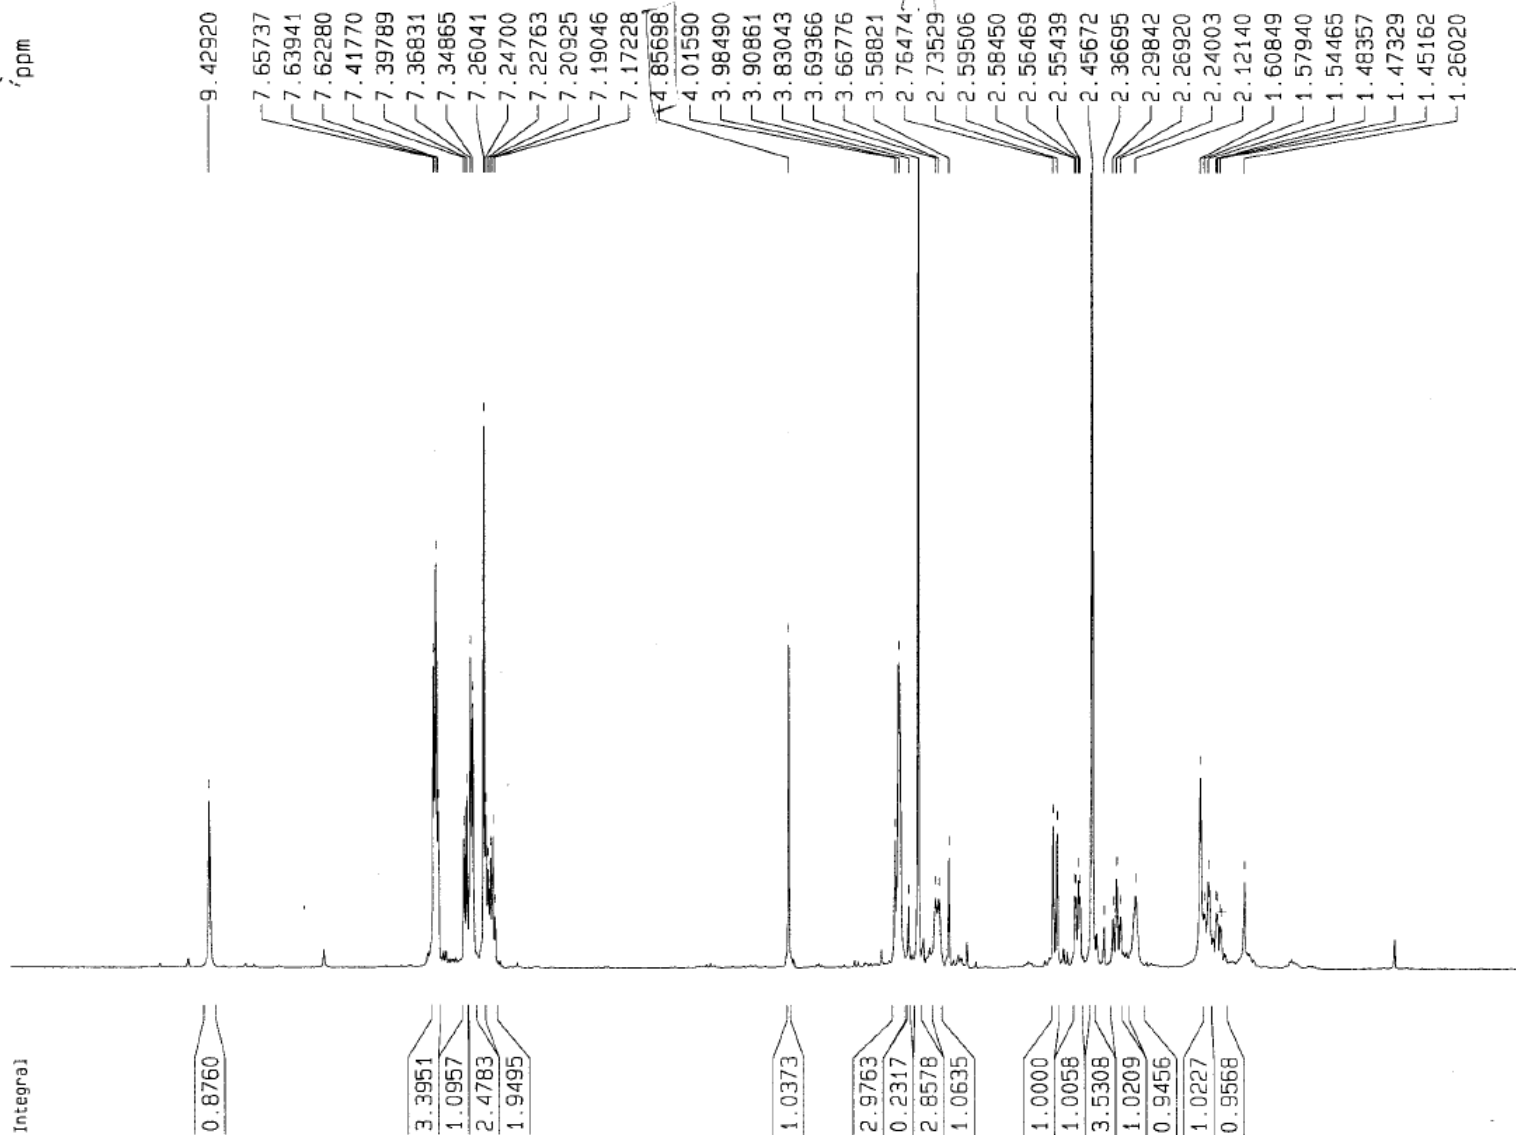

Current Data Parameters  
 NAME 080111FJII-052  
 EXPNO 2  
 PROCNO 1

F2 - Acquisition Parameters  
 Date\_ 20110801  
 Time 17.58  
 INSTRUM spect  
 PROBHD 5 mm BBI 1H-  
 PULPROG zg30  
 TD 65536  
 SOLVENT CDCl3  
 NS 16  
 DS 2  
 SWH 8278.146 Hz  
 FIDRES 0.126314 Hz  
 AQ 3.9584243 sec  
 RG 161.3  
 DW 60.400 usec  
 DE 6.00 usec  
 TE 300.0 K  
 D1 1.00000000 sec

===== CHANNEL f1 =====  
 NUC1 1H  
 P1 6.45 usec  
 PL1 0.00 dB  
 SF01 400.1324710 MHz

F2 - Processing parameters  
 SI 32768  
 SF 400.1300089 MHz  
 WDW EM  
 SSB 0  
 LB 0.30 Hz  
 GB 0  
 PC 1.00

1D NMR plot parameters  
 CX 20.00 cm  
 F1P 11.000 ppm  
 F1 4401.43 Hz  
 F2P -1.000 ppm  
 F2 -400.13 Hz  
 PPMCM 0.60000 ppm/cm  
 HZCM 240.07800 Hz/cm

ppm

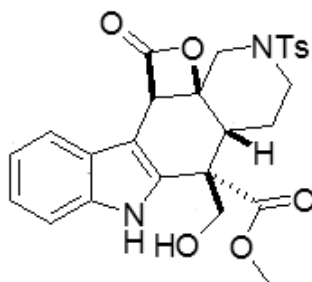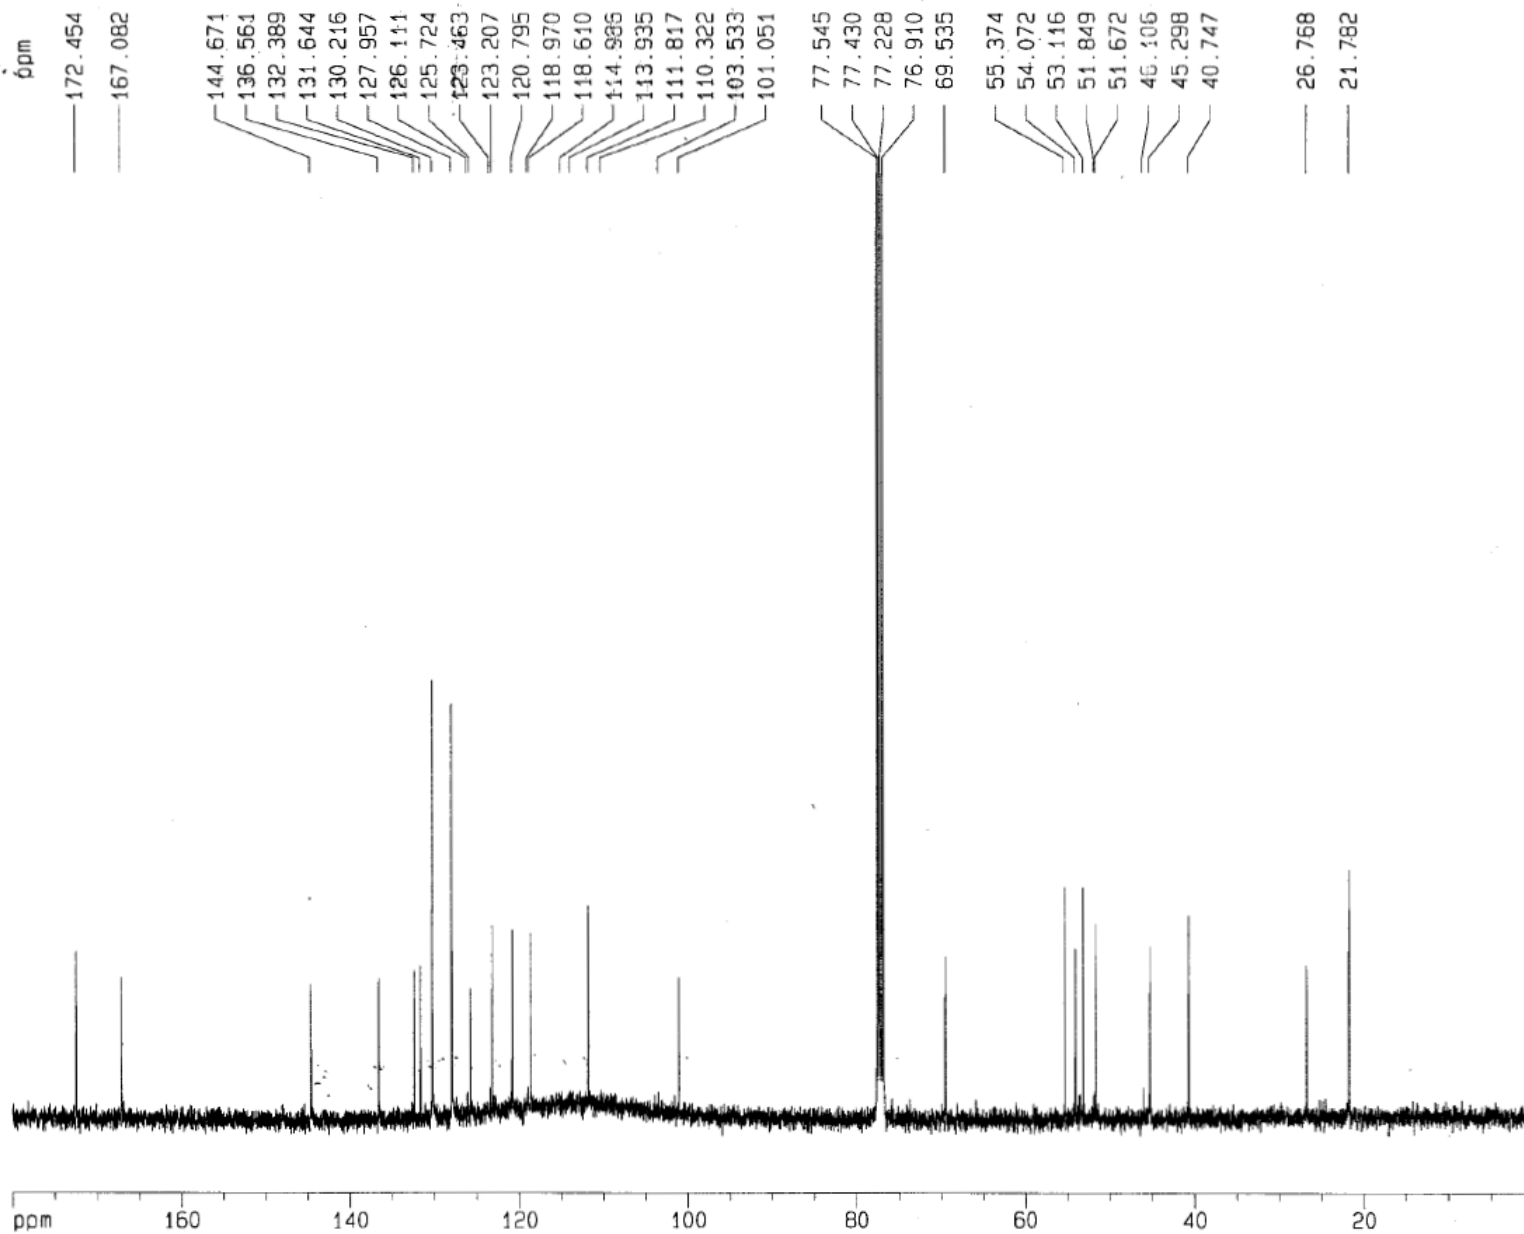

## Current Data Parameters

NAME 080111FJII-052  
 EXPNO 7  
 PROCNO 1

## F2 - Acquisition Parameters

Date\_ 20110802  
 Time 2.55  
 INSTRUM spect  
 PROBHD 5 mm BBI 1H-  
 PULPROG zgpg30  
 TD 65536  
 SOLVENT CDCl3  
 NS 5120  
 DS 4  
 SWH 25125.629 Hz  
 FIDRES 0.383387 Hz  
 AQ 1.3042164 sec  
 RG 16384  
 DW 19.900 usec  
 DE 6.00 usec  
 TE 300.0 K  
 D1 2.0000000 sec  
 d11 0.0300000 sec  
 d12 0.00002000 sec

## ----- CHANNEL f1 -----

NUC1 13C  
 P1 16.35 usec  
 PL1 -6.00 dB  
 SF01 100.6237959 MHz

## ----- CHANNEL f2 -----

CPDPRG2 waltz16  
 NUC2 1H  
 PCPD2 114.00 usec  
 PL2 0.00 dB  
 PL12 24.00 dB  
 PL13 24.00 dB  
 SF02 400.1316005 MHz

## F2 - Processing parameters

SI 32768  
 SF 100.5127499 MHz  
 WDW EM  
 SSB 0  
 LB 1.00 Hz  
 GB 0  
 PC 1.40

## 1D NMR plot parameters

CX 20.00 cm  
 F1P 180.000 ppm  
 F1 18110.29 Hz  
 F2P 0.000 ppm  
 F2 0.00 Hz  
 PPMCM 9.00000 ppm/cm  
 HZCM 905.51471 Hz/cm

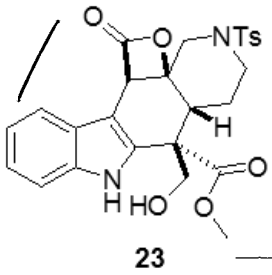

FYQ-II-052053P HMQC

(all)

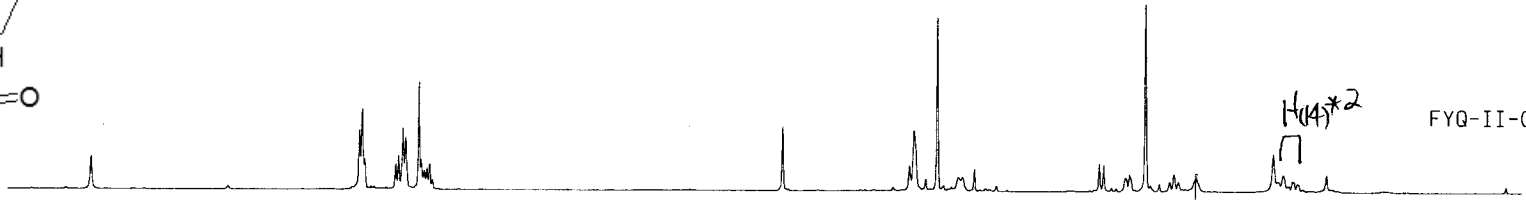

H(4)\*2

TSC(12) →  
 C14 → CH<sub>2</sub>  
 C15(CH) → (CH)  
 C3 → CH<sub>2</sub>  
 C19 → (CH)  
 C20(CH) → (CH)  
 C21(CH) → (CH)  
 C7 → C16  
 CH<sub>2</sub> - C17  
 C7 (QC)  
 Ar-CH → C9/11, C10/12, C11/13  
 C8 (QC) →  
 TSC(4) →  
 C2 (OC) →  
 Ts (OC) →  
 C2 →  
 TSC(OC) →

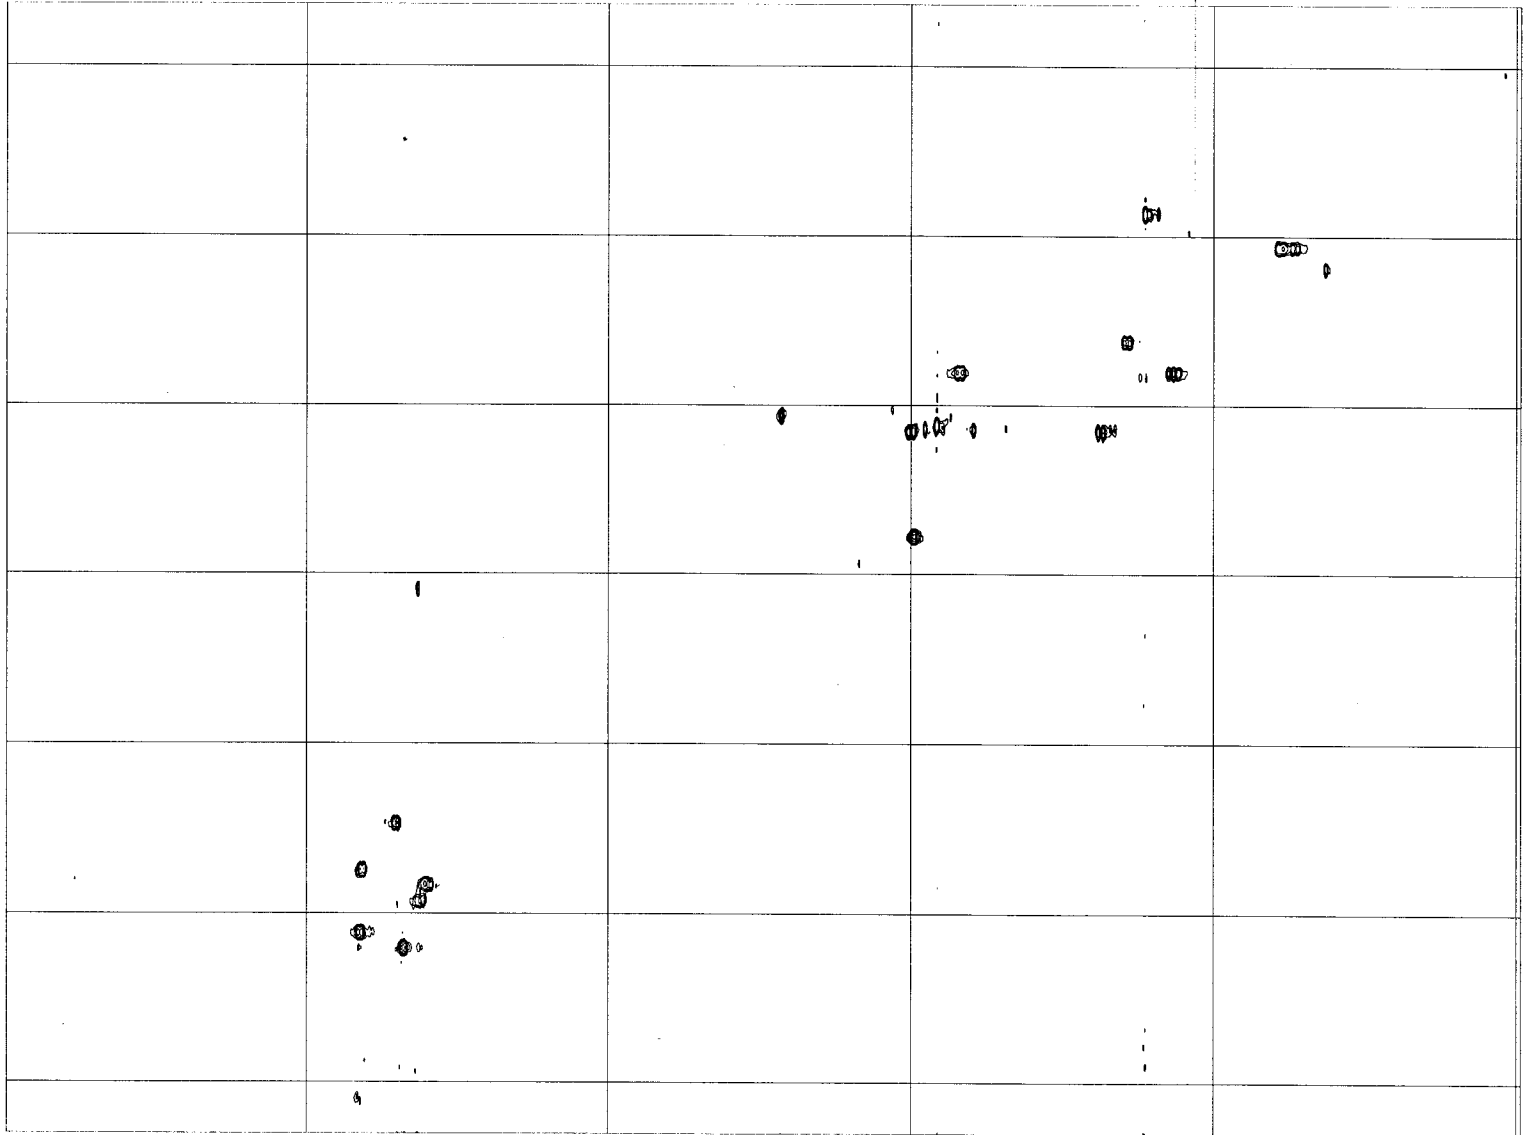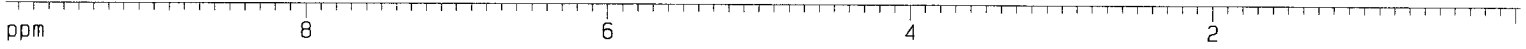

0  
25  
50  
75  
100  
125  
150  
ppm

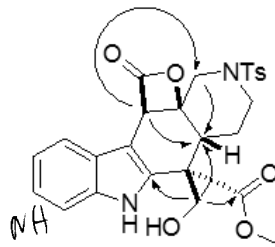

Selected HMBC correlations for  $\alpha$ -Hydroxymethyl Ester 23

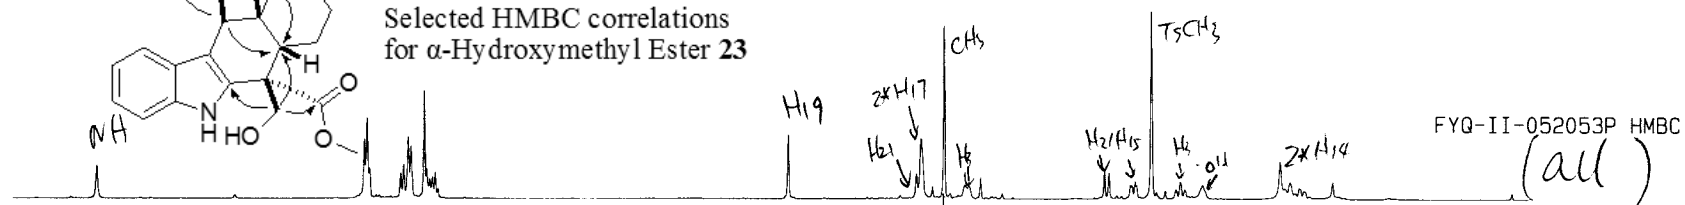

FYQ-II-052053P HMBC

(all)

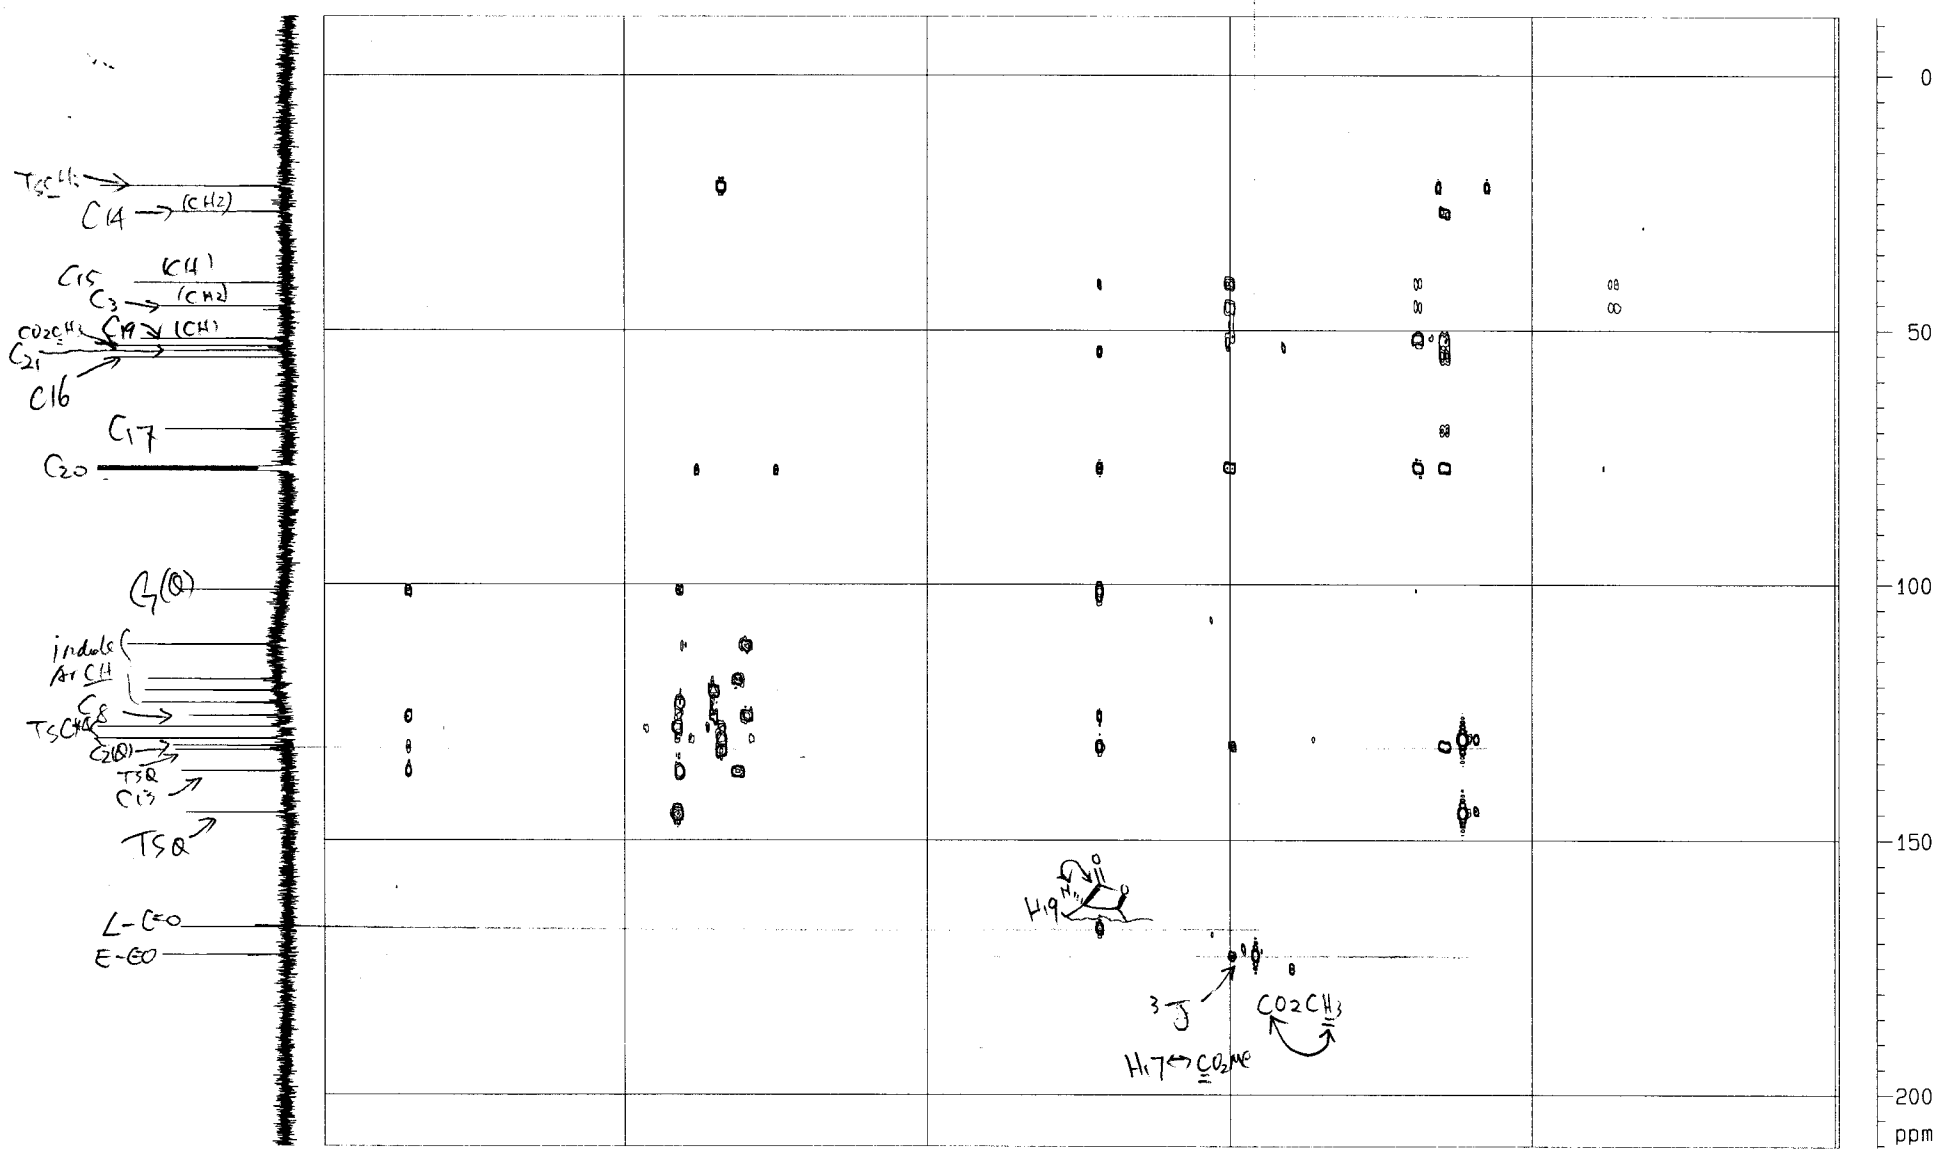

$TSC_{CH_3}$   
 $C_{14} \rightarrow (CH_2)$   
 $C_{15} \rightarrow (CH)$   
 $C_3 \rightarrow (CH_2)$   
 $CO_2CH_3 \rightarrow (CH)$   
 $C_{21} \rightarrow (CH)$   
 $C_{16}$   
 $C_{17}$   
 $C_{20}$

$C_7(O)$   
 indols  
 Ar-CH  
 $C_8$   
 $TSC_{CH_2}$   
 $C_{20}$   
 $TSR$   
 $C_{13}$   
 $TSR$

$L-C=O$   
 $E-C=O$

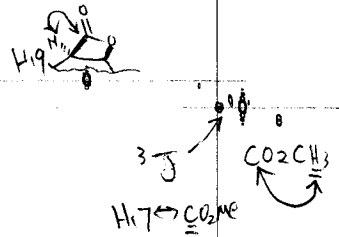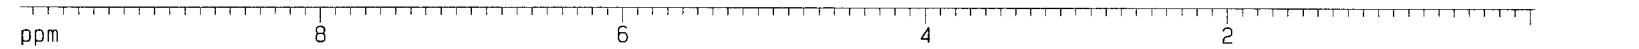

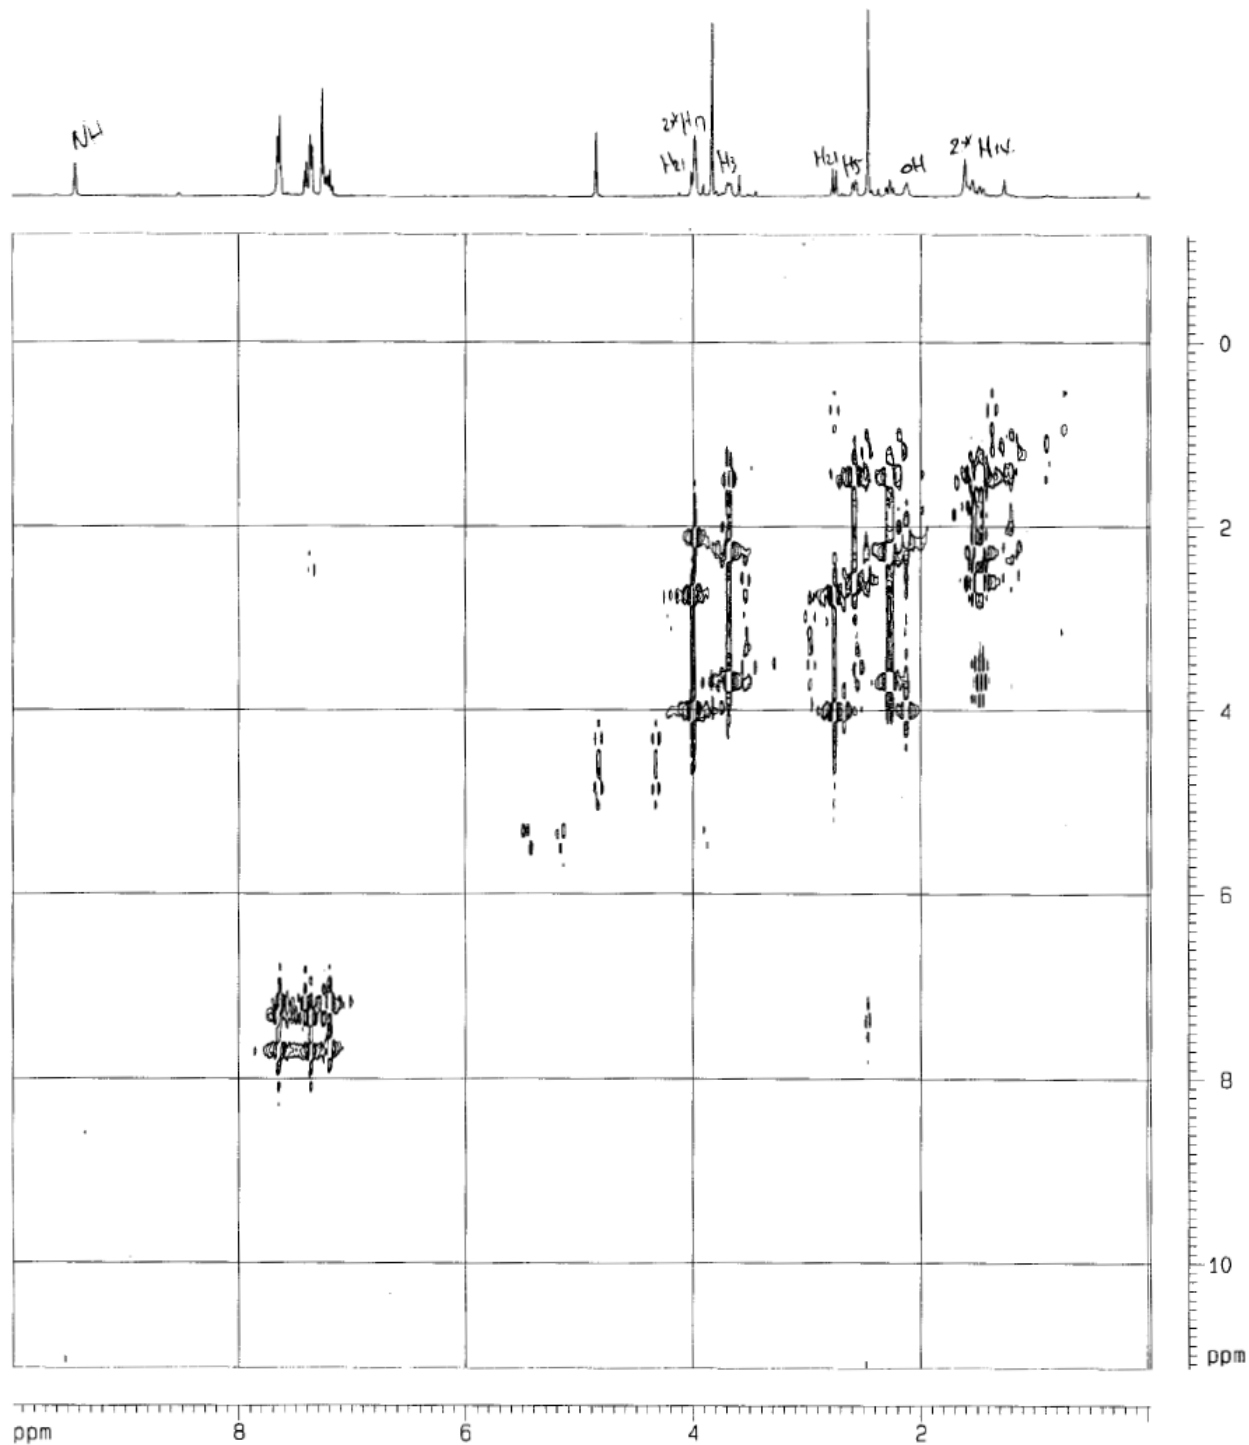

FYQ-II-052053P NOESY

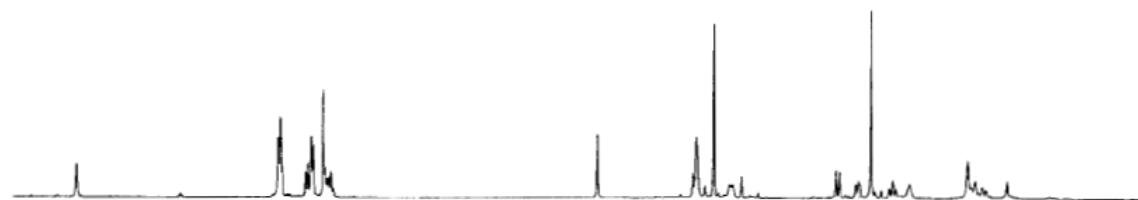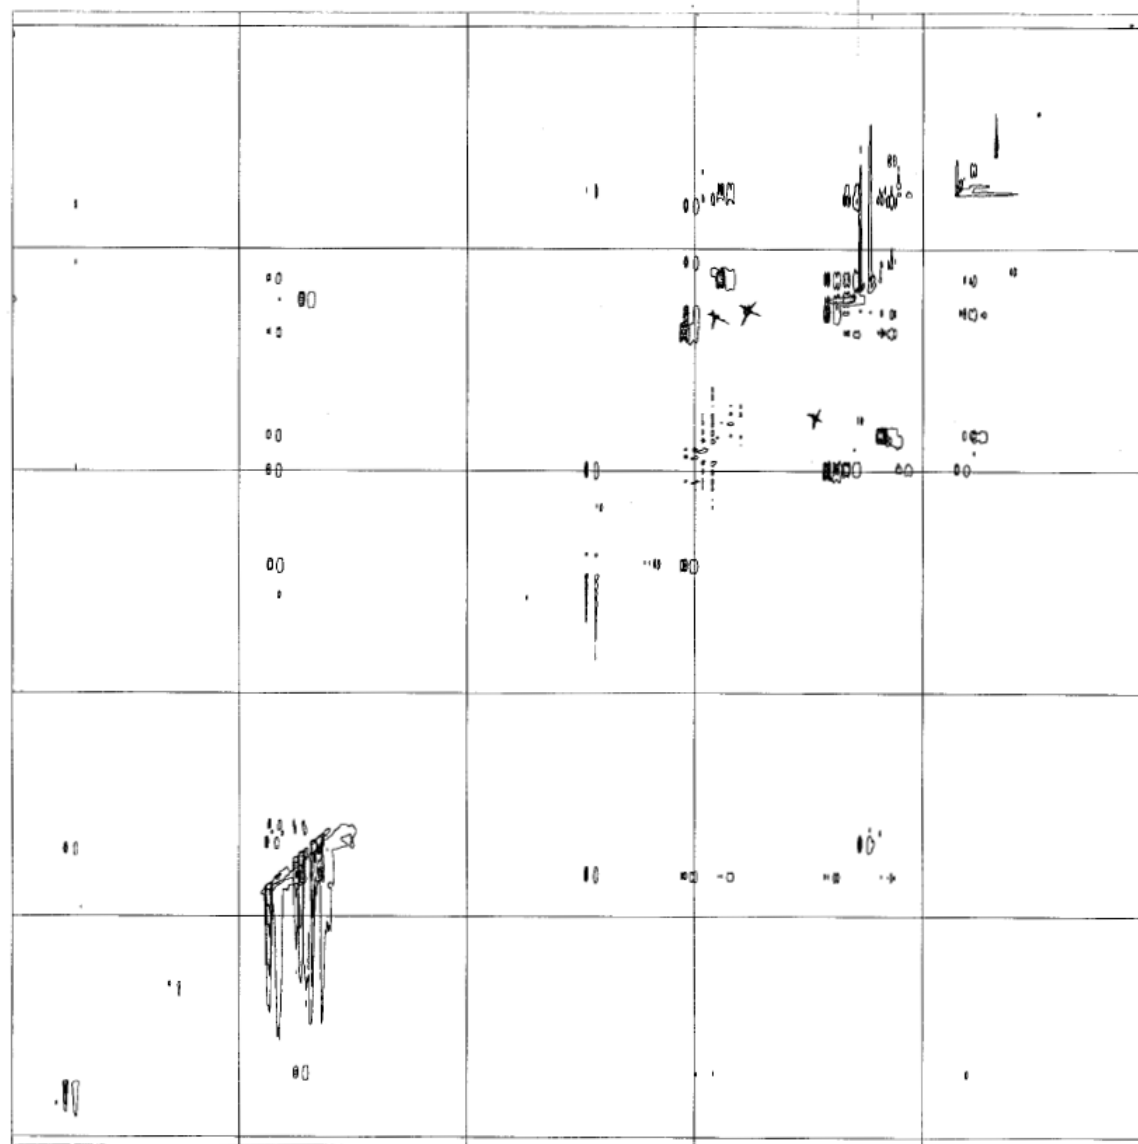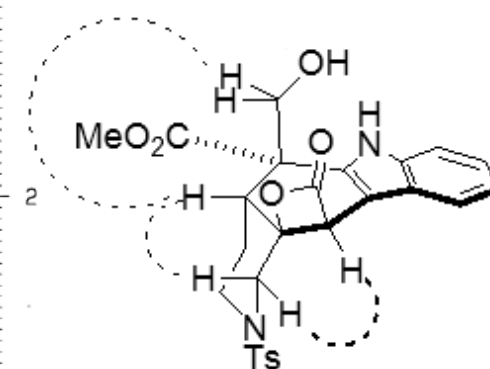

4 Key nOe correlations  
for  $\alpha$ -Hydroxymethyl Ester **23**

--- = nOe correlation

6

8

ppm

ppm

8

6

4

2

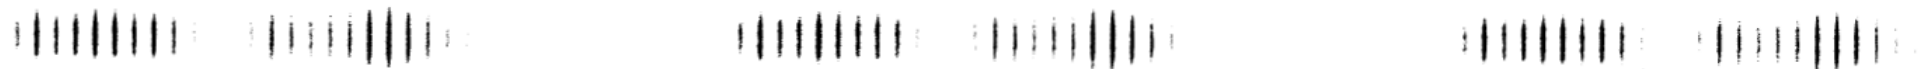

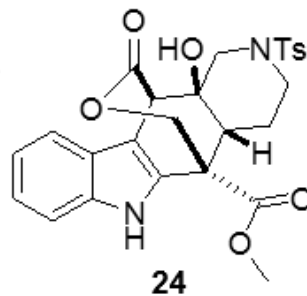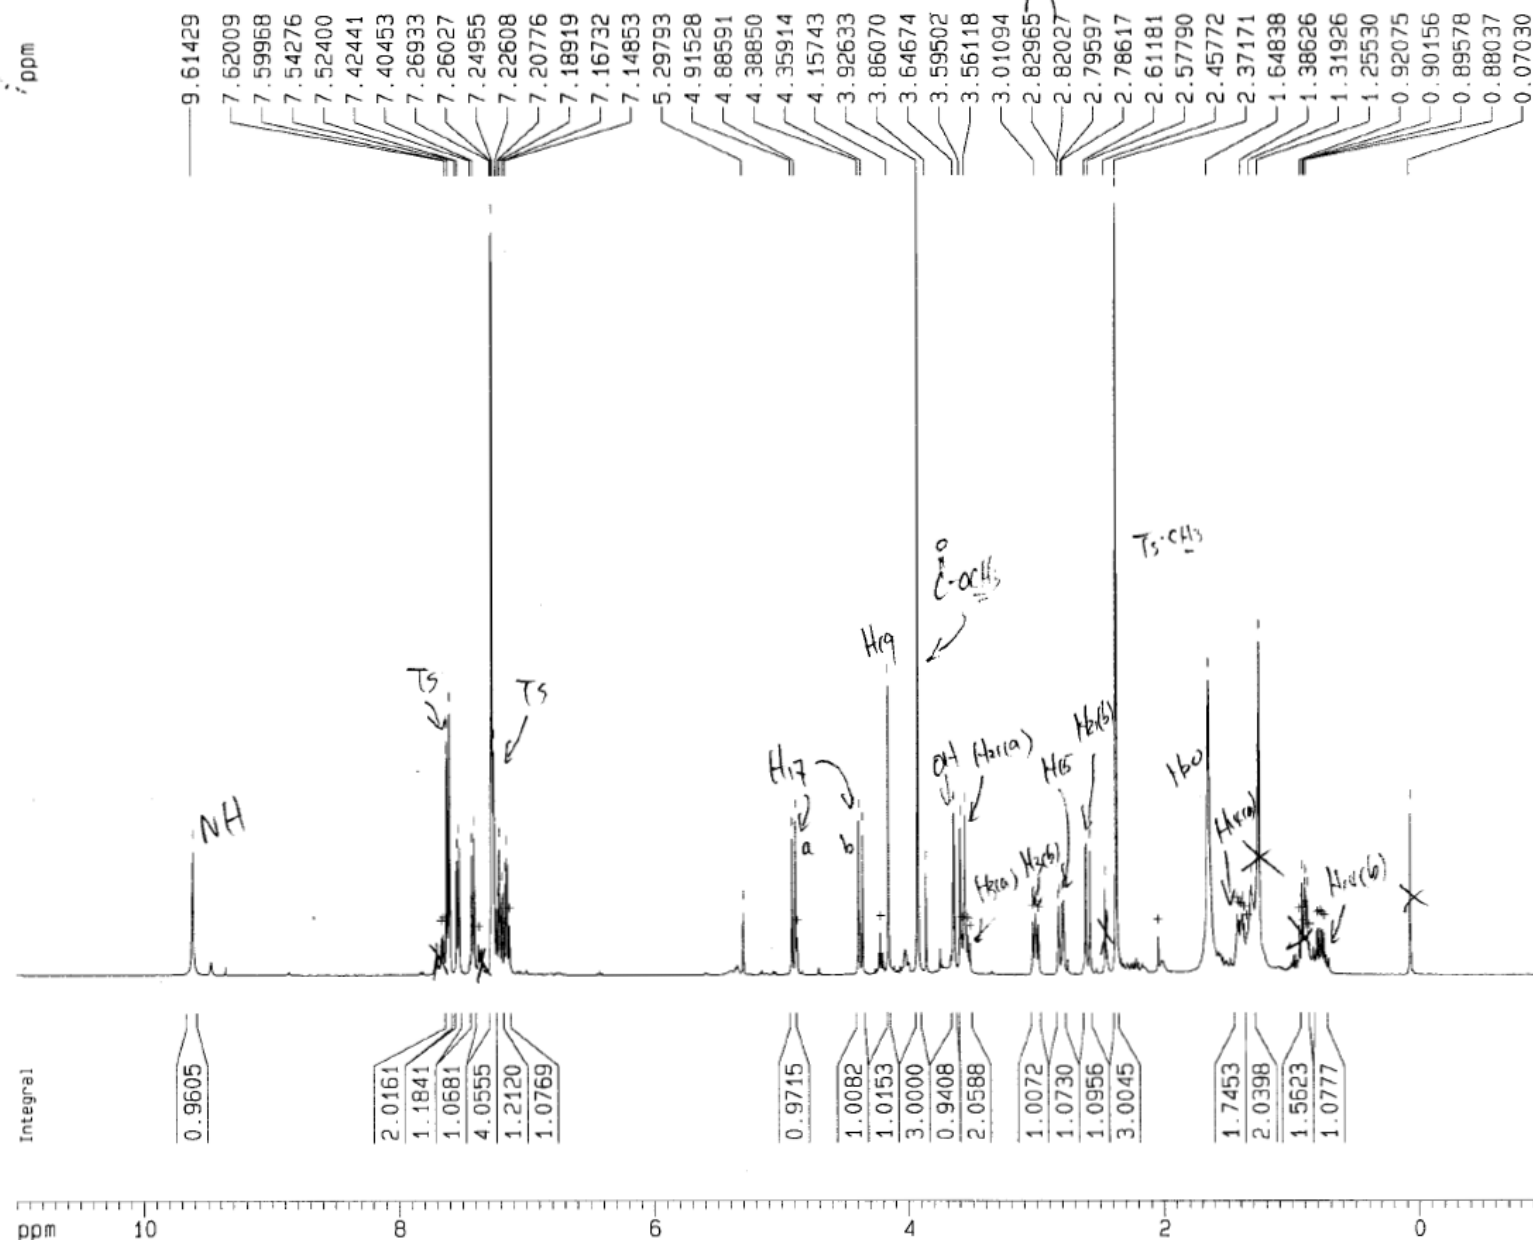

Current Data Parameters  
 NAME 080811FJII-064  
 EXPNO 2  
 PROCNO 1

F2 - Acquisition Parameters  
 Date\_ 20110808  
 Time 18.57  
 INSTRUM spect  
 PROBHD 5 mm BBI 1H-  
 PULPROG zg30  
 TD 65536  
 SOLVENT CDC13  
 NS 16  
 DS 2  
 SWH 8278.146 Hz  
 FIDRES 0.126314 Hz  
 AQ 3.9584243 sec  
 RG 203.2  
 DW 60.400 usec  
 DE 6.00 usec  
 TE 300.0 K  
 D1 1.00000000 sec

----- CHANNEL f1 -----  
 NUC1 1H  
 P1 6.45 usec  
 PL1 0.00 dB  
 SF01 400.1324710 MHz

F2 - Processing parameters  
 SI 32768  
 SF 400.1300091 MHz  
 WDW EM  
 SSB 0  
 LB 0.30 Hz  
 GB 0  
 PC 1.00

1D NMR plot parameters  
 CX 20.00 cm  
 F1P 11.000 ppm  
 F1 4401.43 Hz  
 F2P -1.000 ppm  
 F2 -400.13 Hz  
 PPMCM 0.60000 ppm/cm  
 HZCM 240.07800 Hz/cm



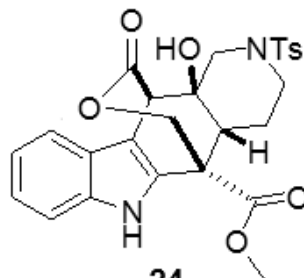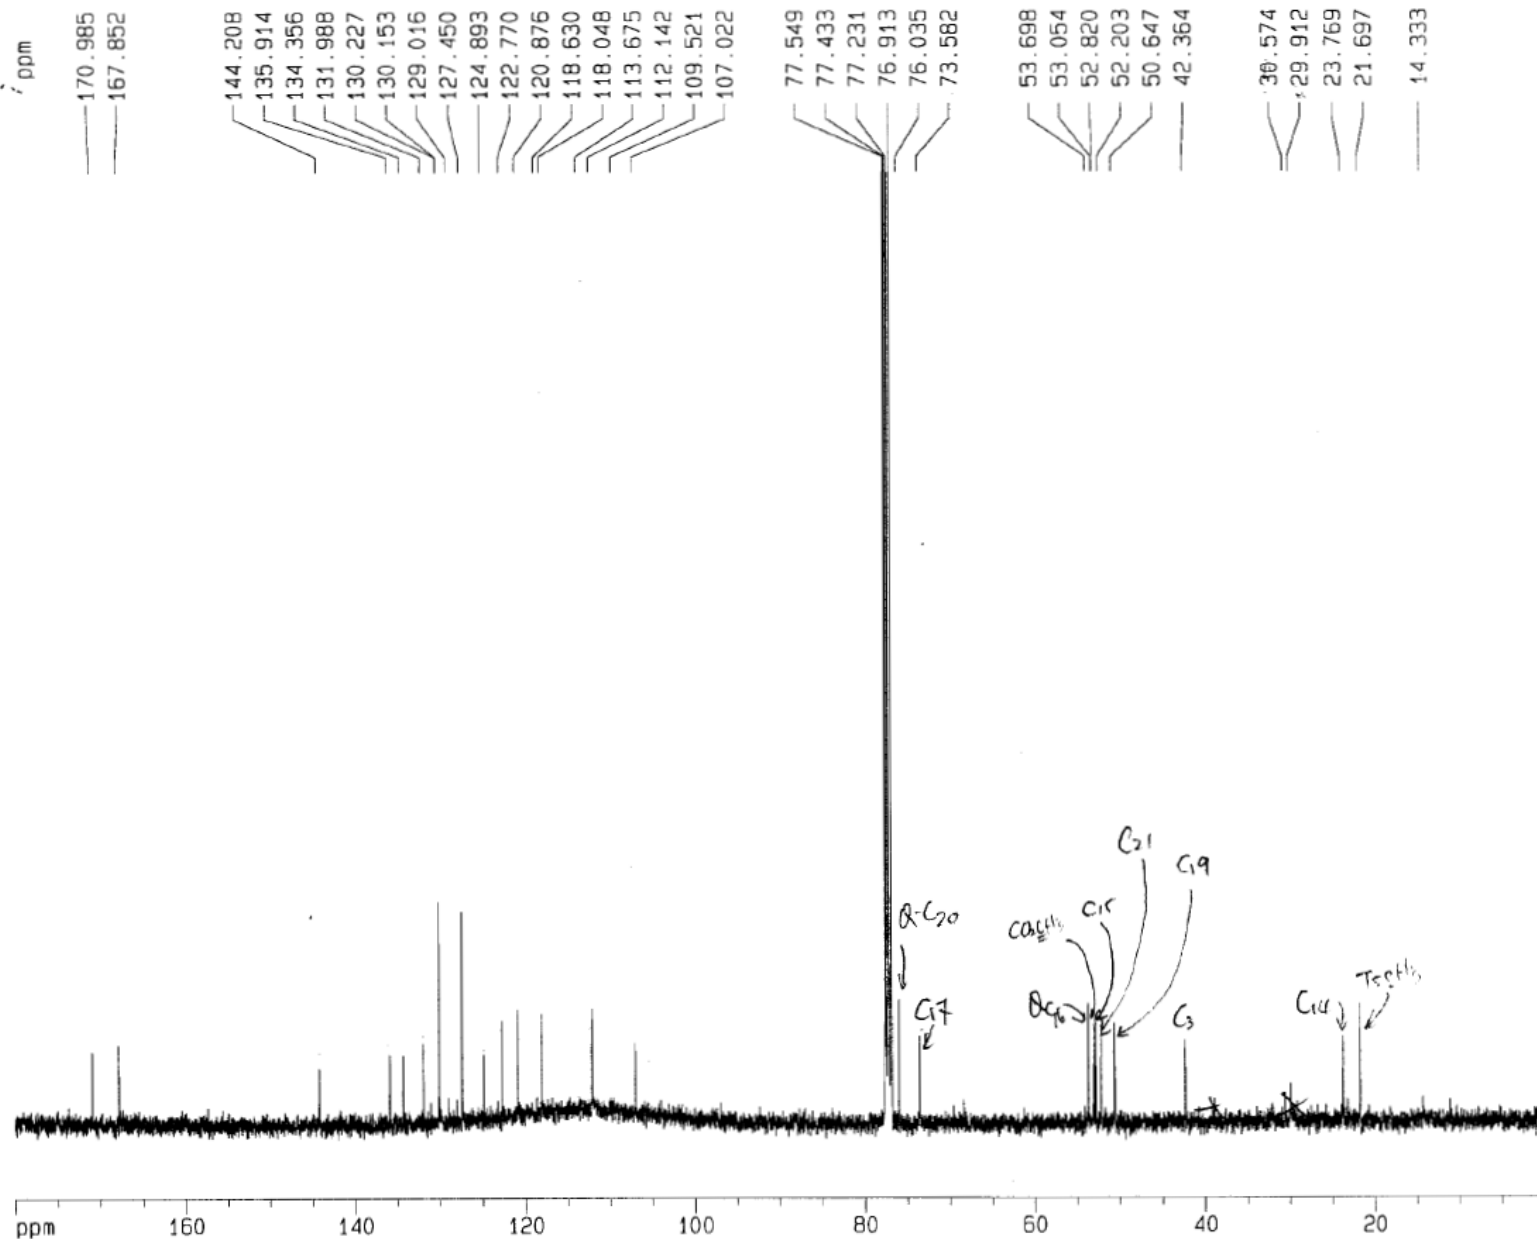

Current Data Parameters  
NAME 080811FJ11-064  
EXPNO 7  
PROCNO 1

F2 - Acquisition Parameters  
Date\_ 20110809  
Time 4.49  
INSTRUM spect  
PROBHD 5 mm BBI 1H-  
PULPROG zgpg30  
TD 65536  
SOLVENT CDC13  
NS 6144  
DS 4  
SWH 25125.629 Hz  
FIDRES 0.383387 Hz  
AQ 1.3042164 sec  
RG 16384  
DW 19.900 usec  
DE 6.00 usec  
TE 300.0 K  
D1 2.00000000 sec  
d11 0.03000000 sec  
d12 0.00002000 sec

===== CHANNEL f1 =====  
NUC1 13C  
P1 16.35 usec  
PL1 -6.00 dB  
SFO1 100.6237959 MHz

===== CHANNEL f2 =====  
CPDPRG2 waltz16  
NUC2 1H  
PCPD2 114.00 usec  
PL2 0.00 dB  
PL12 24.00 dB  
PL13 24.00 dB  
SFO2 400.1316005 MHz

F2 - Processing parameters  
SI 32768  
SF 100.6127484 MHz  
WDW EM  
SSB 0  
LB 1.00 Hz  
GB 0  
PC 1.40

1D NMR plot parameters  
CX 20.00 cm  
F1P 180.000 ppm  
F1 18110.29 Hz  
F2P 0.000 ppm  
F2 0.00 Hz  
PRMCM 9.00000 ppm/cm  
HZCM 905.51471 Hz/cm

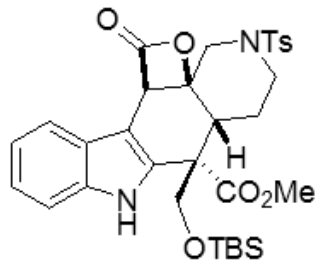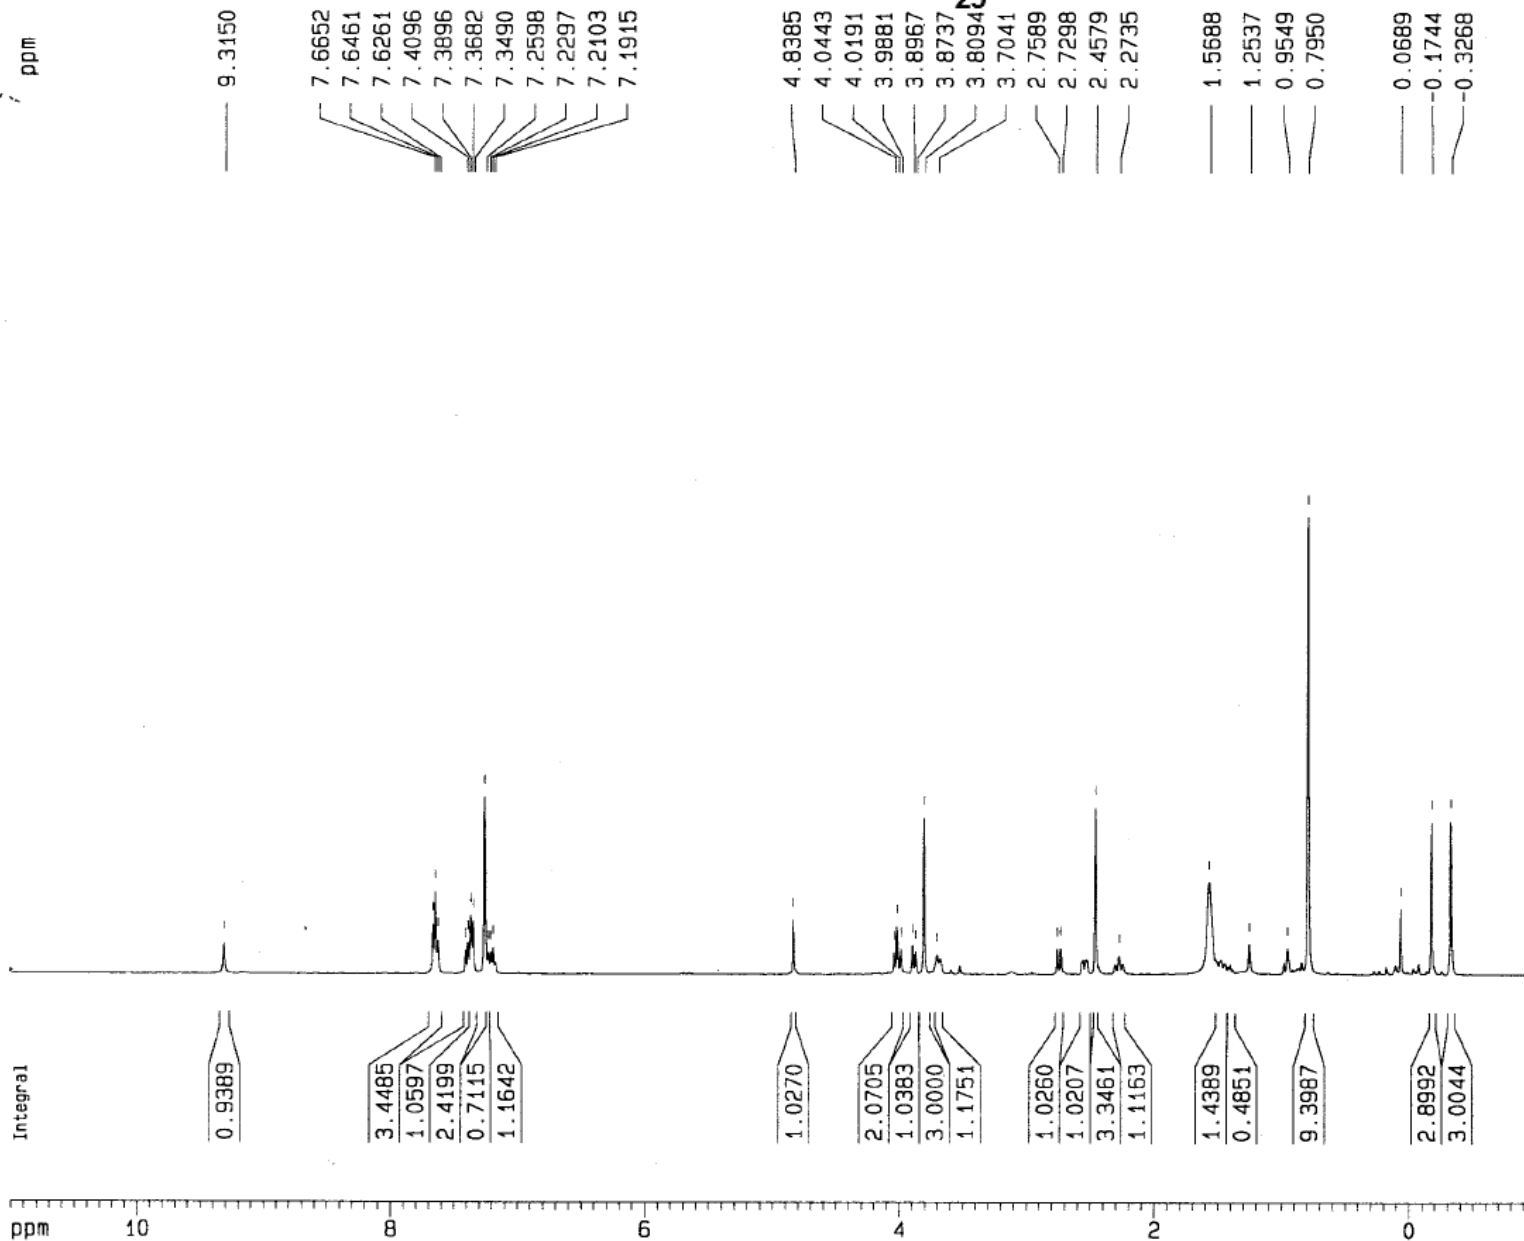

Current Data Parameters  
 NAME 090712FJIII291  
 EXPNO 1  
 PROCNO 1

F2 - Acquisition Parameters  
 Date\_ 20120907  
 Time 11.52  
 INSTRUM spect  
 PROBHD 5 mm BBI 1H-  
 PULPROG zg30  
 TD 65536  
 SOLVENT CDCl3  
 NS 32  
 DS 2  
 SWH 8278.146 Hz  
 FIDRES 0.126314 Hz  
 AQ 3.9584243 sec  
 RG 322.5  
 DW 60.400 usec  
 DE 6.00 usec  
 TE 300.0 K  
 D1 1.00000000 sec

===== CHANNEL f1 =====  
 NUC1 1H  
 P1 6.45 usec  
 PL1 0.00 dB  
 SF01 400.1324710 MHz

F2 - Processing parameters  
 SI 32768  
 SF 400.1300096 MHz  
 WDW EM  
 SSB 0  
 LB 0.30 Hz  
 GB 0  
 PC 1.00

1D NMR plot parameters  
 CX 20.00 cm  
 F1P 11.000 ppm  
 F1 4401.43 Hz  
 F2P -1.000 ppm  
 F2 -400.13 Hz  
 PPMCM 0.60000 ppm/cm  
 HZCM 240.07800 Hz/cm

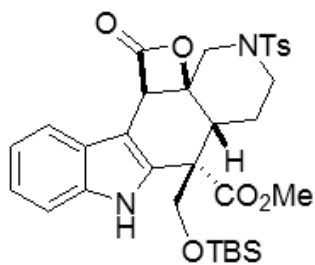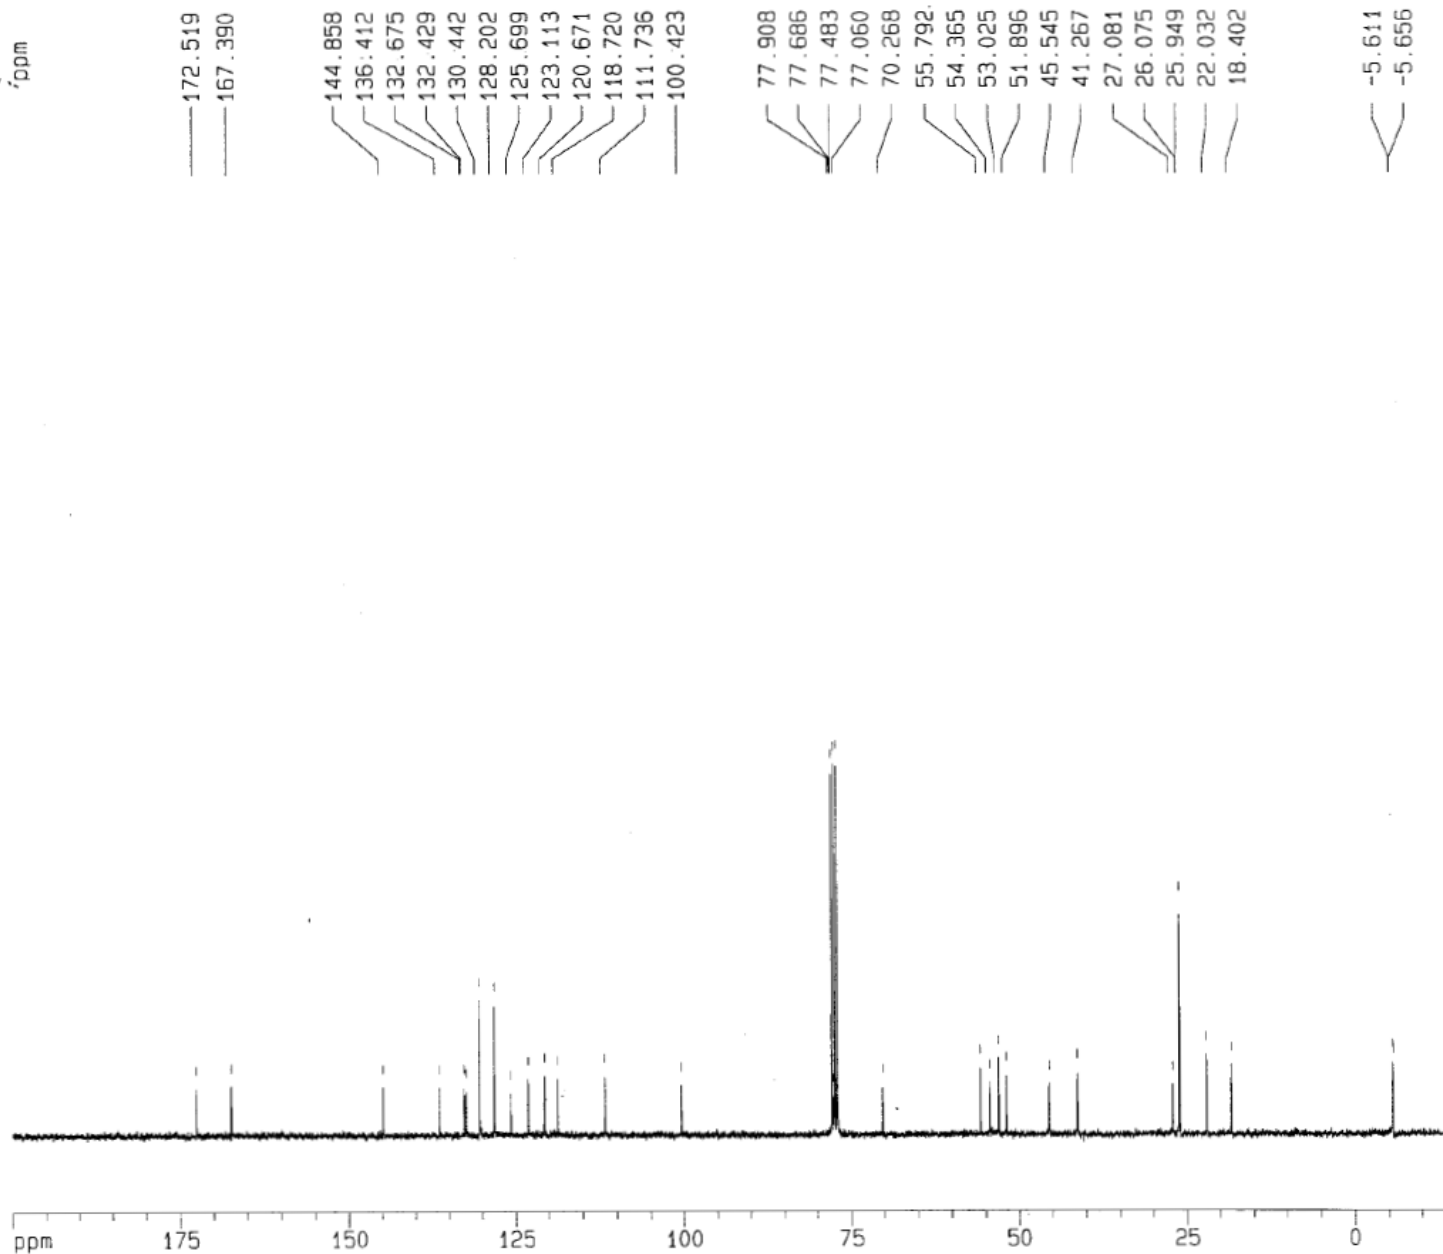

Current Data Parameters  
 NAME 090512FJIII290  
 EXPNO 2  
 PROCNO 1

F2 - Acquisition Parameters  
 Date\_ 20120905  
 Time 17.10  
 INSTRUM spect  
 PROBHD 5 mm GNP 1H/1  
 PULPROG zgpg30  
 TD 65536  
 SOLVENT CDCl3  
 NS 830  
 DS 4  
 SWH 18796.992 Hz  
 FIDRES 0.286819 Hz  
 AQ 1.7433076 sec  
 RG 512  
 DW 26.600 usec  
 DE 6.00 usec  
 TE 300.0 K  
 D1 2.0000000 sec  
 D11 0.0300000 sec  
 D12 0.0000200 sec

===== CHANNEL f1 =====  
 NUC1 13C  
 P1 5.25 usec  
 PL1 -6.00 dB  
 SF01 75.4106357 MHz

===== CHANNEL f2 =====  
 CPDPRG2 waltz16  
 NUC2 1H  
 PCPD2 115.00 usec  
 PL2 0.00 dB  
 PL12 19.70 dB  
 PL13 19.70 dB  
 SF02 299.8711995 MHz

F2 - Processing parameters  
 SI 32768  
 SF 75.4023410 MHz  
 WDW EM  
 SSB 0  
 LB 1.00 Hz  
 GB 0  
 PC 1.40

1D NMR plot parameters  
 CX 20.00 cm  
 F1P 200.000 ppm  
 F1 15080.47 Hz  
 F2P -30.000 ppm  
 F2 -2262.07 Hz  
 PPMCM 11.50000 ppm/cm  
 HZCM 867.12695 Hz/cm

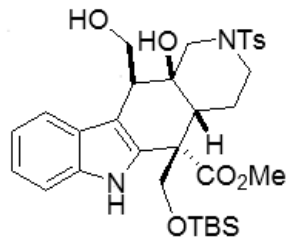

26

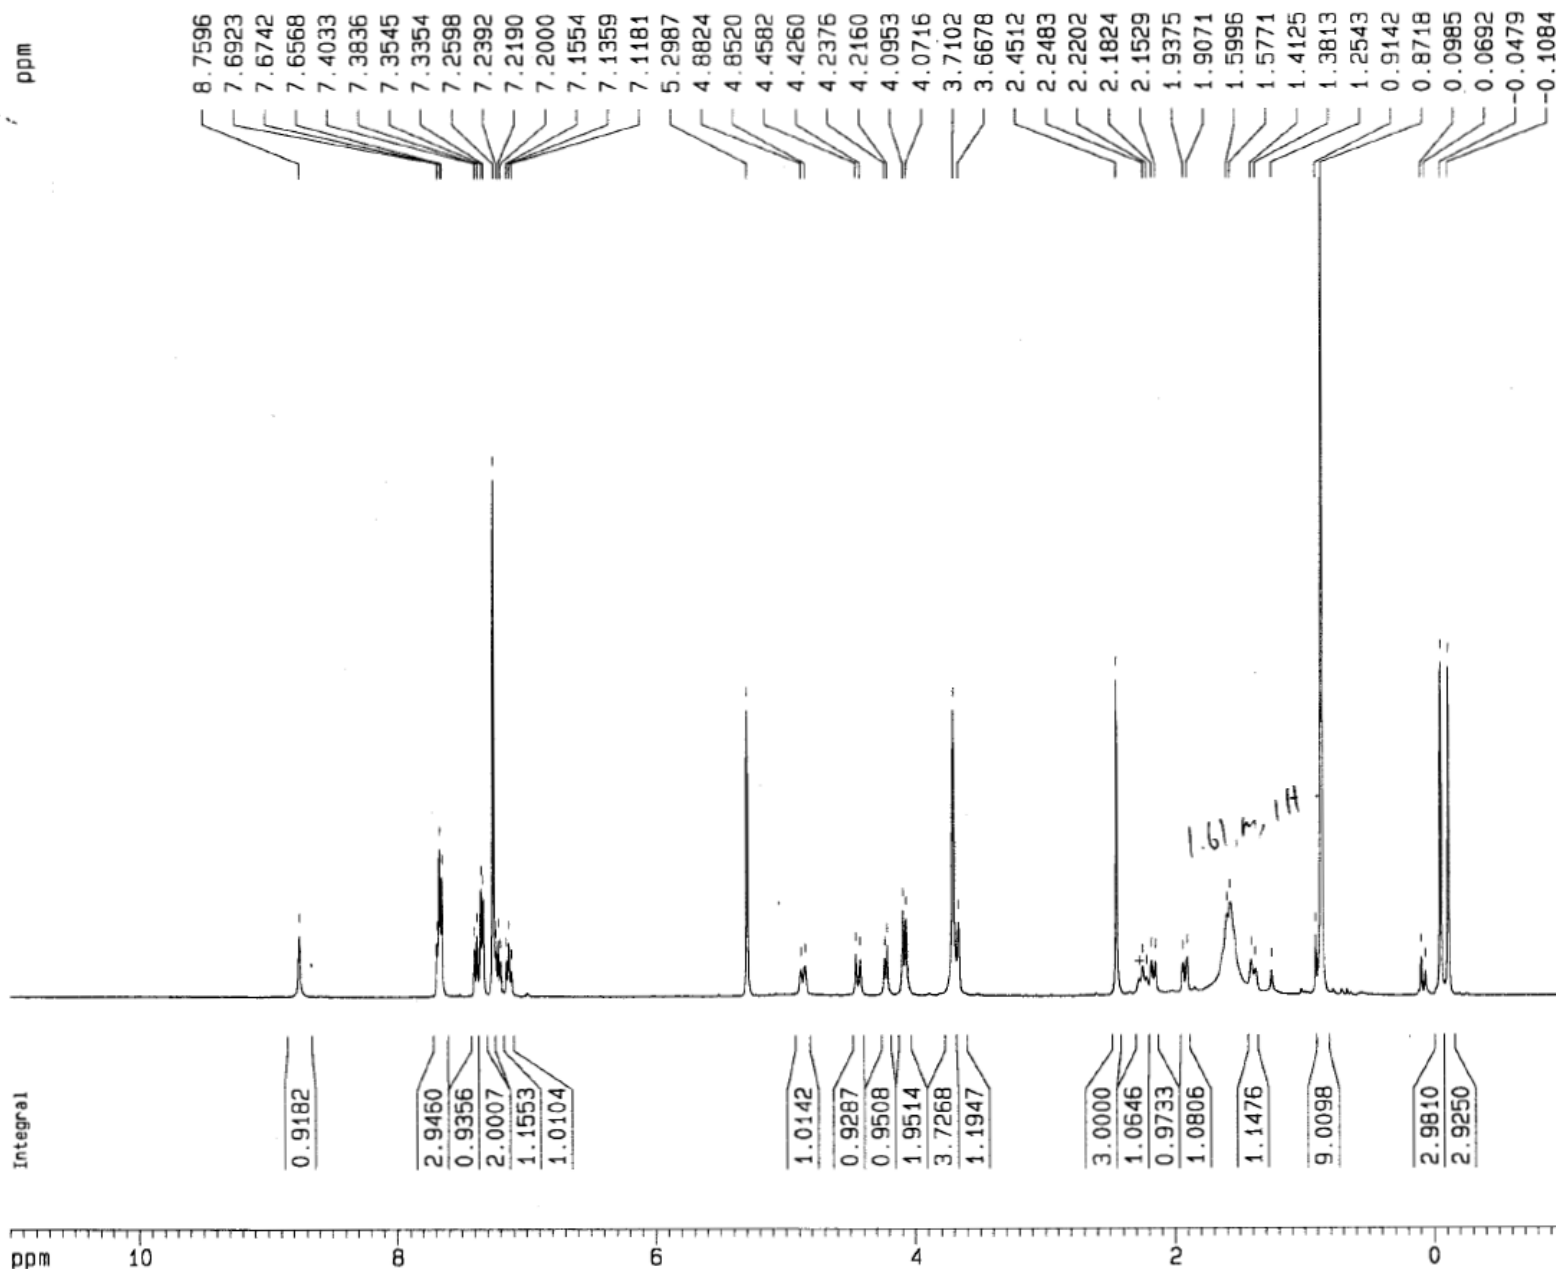

Current Data Parameters  
 NAME 090712FJIII292  
 EXPNO 1  
 PROCNO 1

F2 - Acquisition Parameters  
 Date\_ 20120907  
 Time 11.45  
 INSTRUM spect  
 PROBHD 5 mm BBI 1H-  
 PULPROG zg30  
 TD 65536  
 SOLVENT CDCl3  
 NS 16  
 DS 2  
 SWH 8278.146 Hz  
 FIDRES 0.126314 Hz  
 AQ 3.9584243 sec  
 RG 456.1  
 DW 60.400 usec  
 DE 6.00 usec  
 TE 300.0 K  
 D1 1.00000000 sec

----- CHANNEL f1 -----  
 NUC1 1H  
 P1 6.45 usec  
 PL1 0.00 dB  
 SFO1 400.1324710 MHz

F2 - Processing parameters  
 SI 32768  
 SF 400.1300095 MHz  
 WDM EM  
 SSB 0  
 LB 0.30 Hz  
 GB 0  
 PC 1.00

1D NMR plot parameters  
 CX 20.00 cm  
 F1P 11.000 ppm  
 F1 4401.43 Hz  
 F2P -1.000 ppm  
 F2 -400.13 Hz  
 PPMCM 0.60000 ppm/cm  
 HZCM 240.07800 Hz/cm

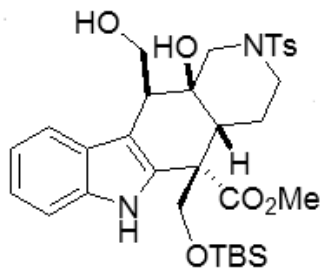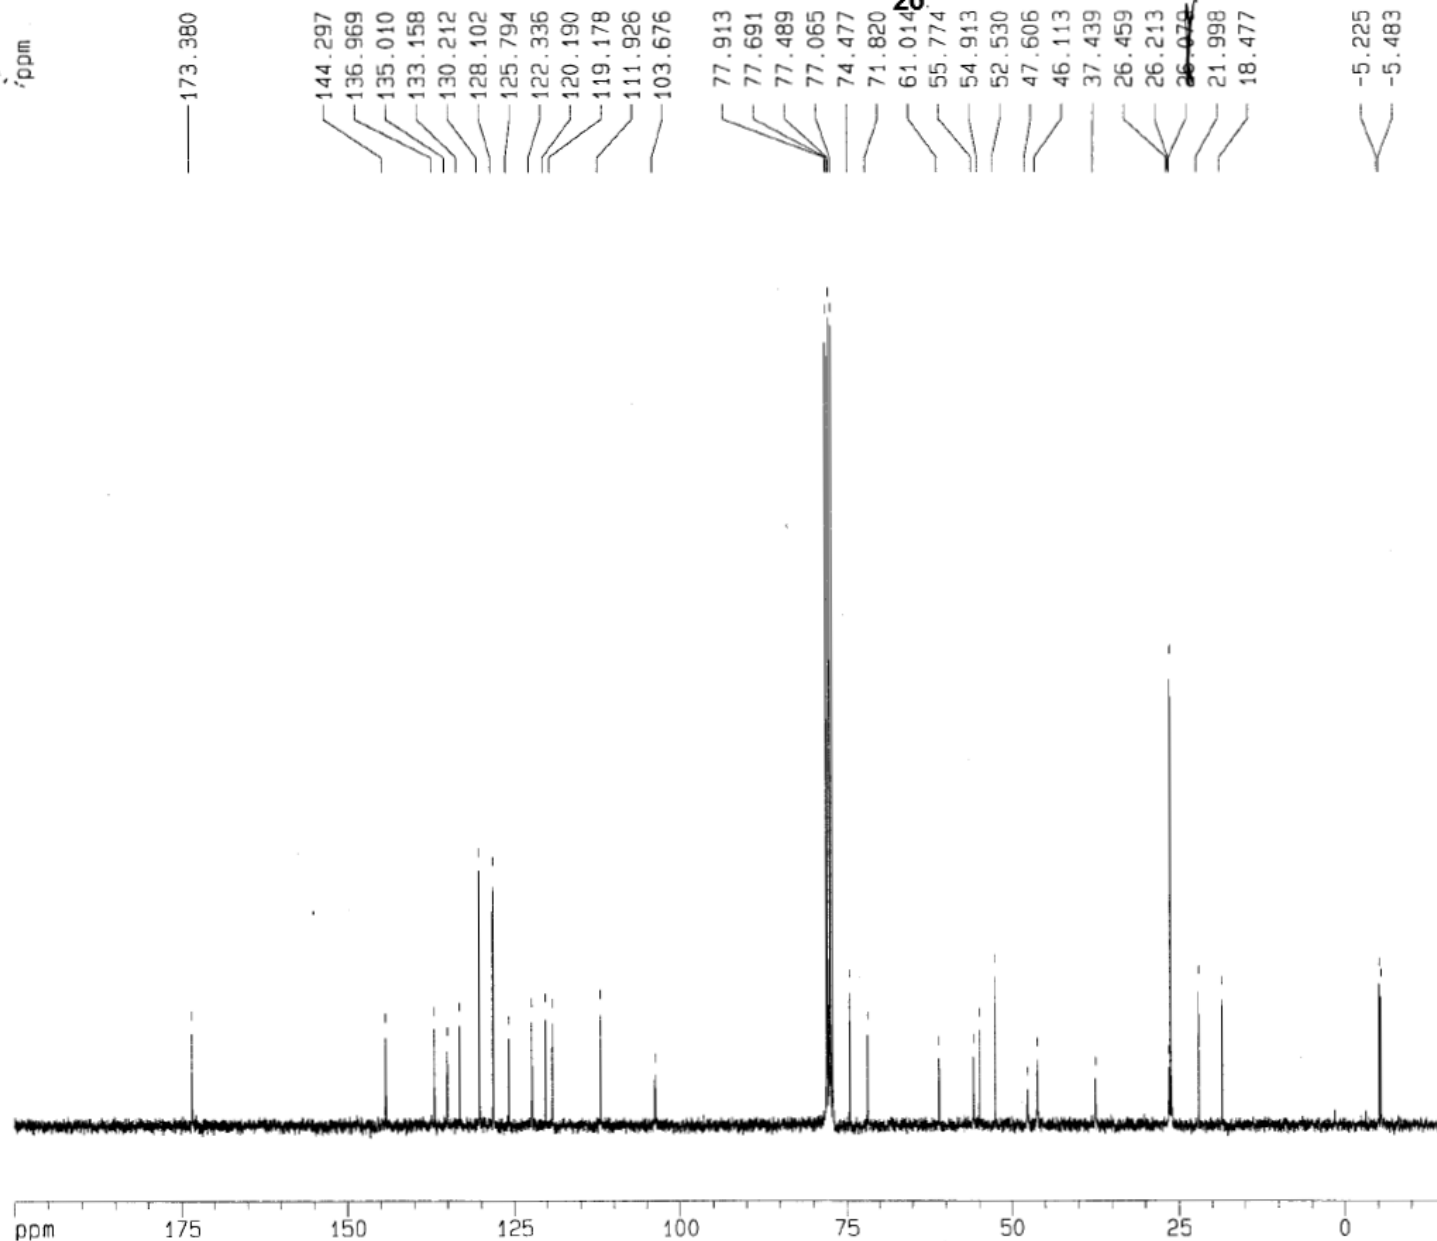

Current Data Parameters  
 NAME 090612FJII292  
 EXPNO 2  
 PROCNO 1

F2 - Acquisition Parameters  
 Date\_ 20120906  
 Time 16.43  
 INSTRUM spect  
 PROBHD 5 mm QNP 1H/1  
 PULPROG zgpg30  
 TD 65536  
 SOLVENT CDC13  
 NS 567  
 DS 4  
 SWH 18796.992 Hz  
 FIDRES 0.286819 Hz  
 AQ 1.7433076 sec  
 RG 1024  
 DW 26.600 usec  
 DE 6.00 usec  
 TE 300.0 K  
 D1 2.0000000 sec  
 D11 0.0300000 sec  
 D12 0.0002000 sec

===== CHANNEL f1 =====  
 NUC1 13C  
 P1 5.25 usec  
 PL1 -6.00 dB  
 SFO1 75.4106357 MHz

===== CHANNEL f2 =====  
 CPDPRG2 waltz16  
 NUC2 1H  
 PCPD2 115.00 usec  
 PL2 0.00 dB  
 PL12 19.70 dB  
 PL13 19.70 dB  
 SFO2 299.8711995 MHz

F2 - Processing parameters  
 SI 32768  
 SF 75.4023410 MHz  
 WDW EM  
 SSB 0  
 LB 1.00 Hz  
 GB 0  
 PC 1.40

1D NMR plot parameters  
 CX 20.00 cm  
 F1P 200.000 ppm  
 F1 15080.47 Hz  
 F2P -30.000 ppm  
 F2 -2262.07 Hz  
 PPMCM 11.50000 ppm/cm  
 HZCM 867.12695 Hz/cm

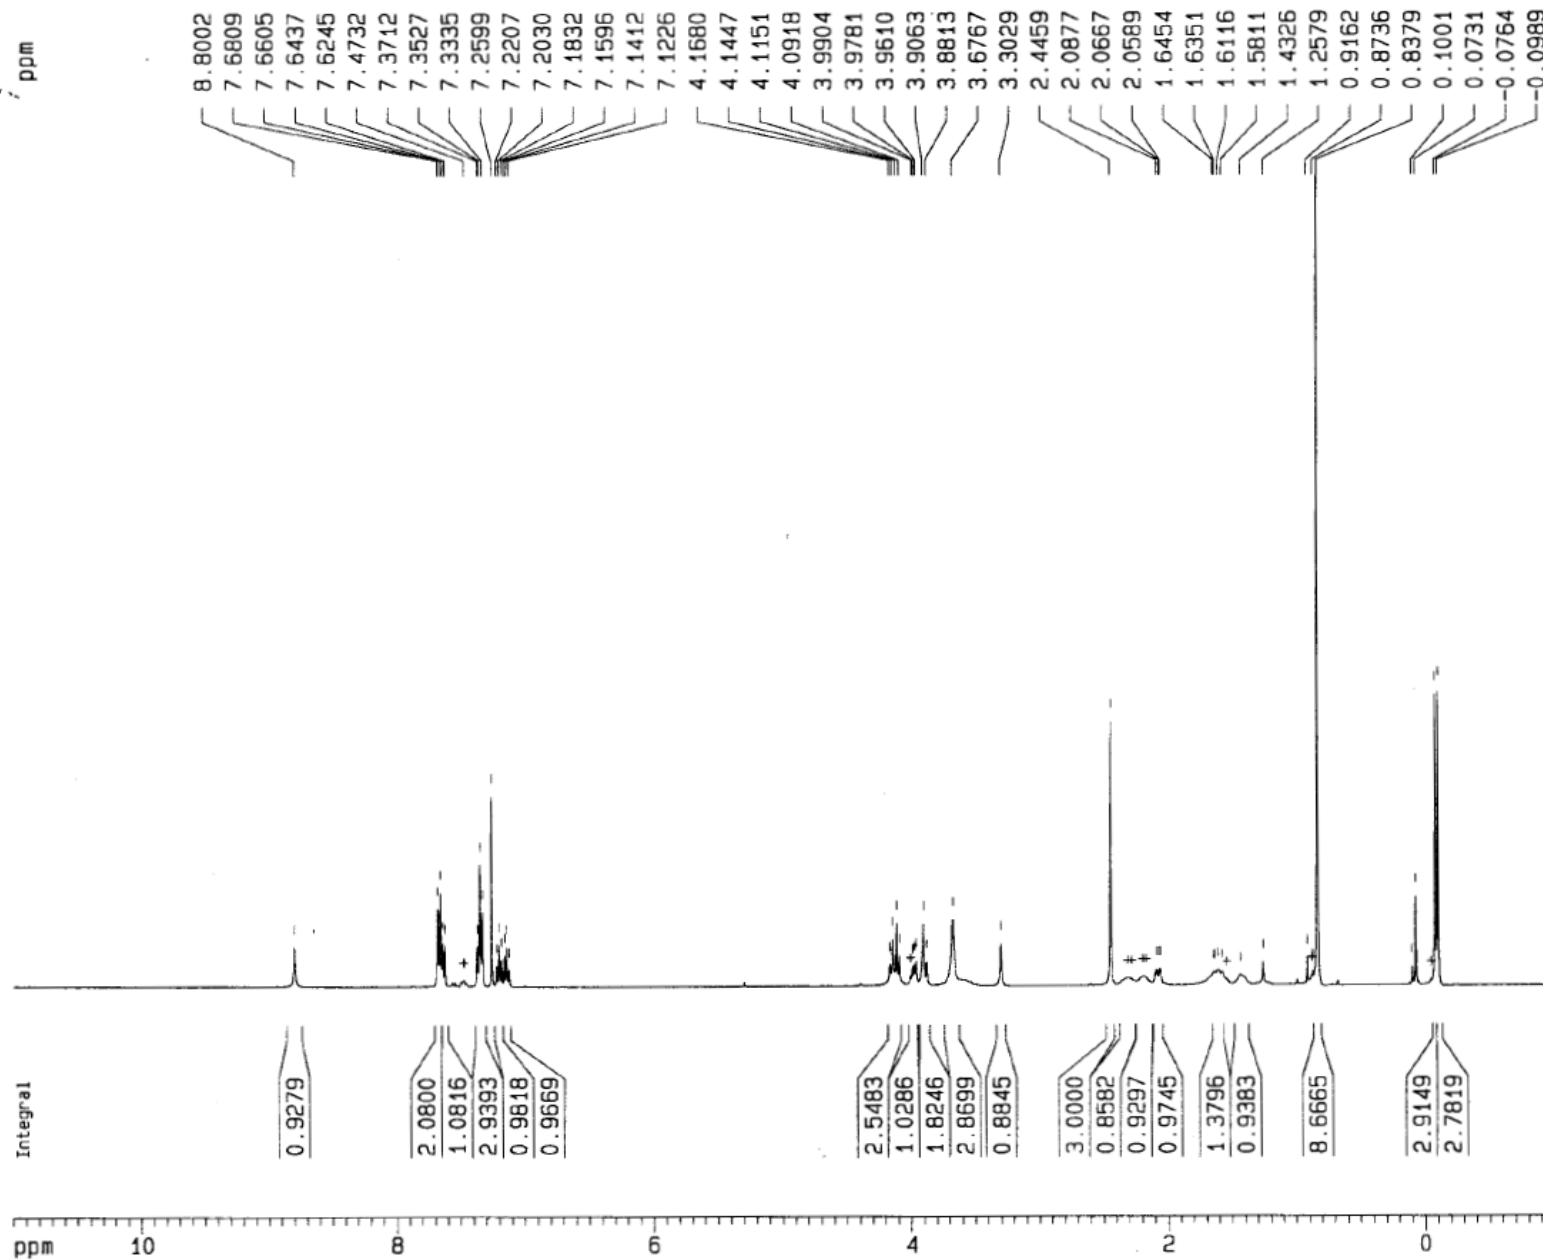

Current Data Parameters  
 NAME 090712FJIII294  
 EXPNO 1  
 PROCNO 1

F2 - Acquisition Parameters  
 Date\_ 20120907  
 Time 19.09  
 INSTRUM spect  
 PROBHD 5 mm BBI 1H-  
 PULPROG zg30  
 TD 65536  
 SOLVENT CDCl3  
 NS 8  
 DS 2  
 SWH 8278.146 Hz  
 FIDRES 0.126314 Hz  
 AQ 3.9584243 sec  
 RG 574.7  
 DW 60.400 usec  
 DE 6.00 usec  
 TE 300.0 K  
 D1 1.00000000 sec

----- CHANNEL f1 -----  
 NUC1 1H  
 P1 6.45 usec  
 PL1 0.00 dB  
 SF01 400.1324710 MHz

F2 - Processing parameters  
 SI 32768  
 SF 400.1300091 MHz  
 WDW EM  
 SSB 0  
 LB 0.30 Hz  
 GB 0  
 PC 1.00

1D NMR plot parameters  
 CX 20.00 cm  
 F1P 11.000 ppm  
 F1 4401.43 Hz  
 F2P -1.000 ppm  
 F2 -400.13 Hz  
 PPMCM 0.60000 ppm/cm  
 HZCM 240.07800 Hz/cm

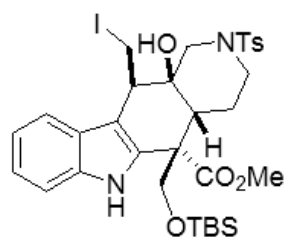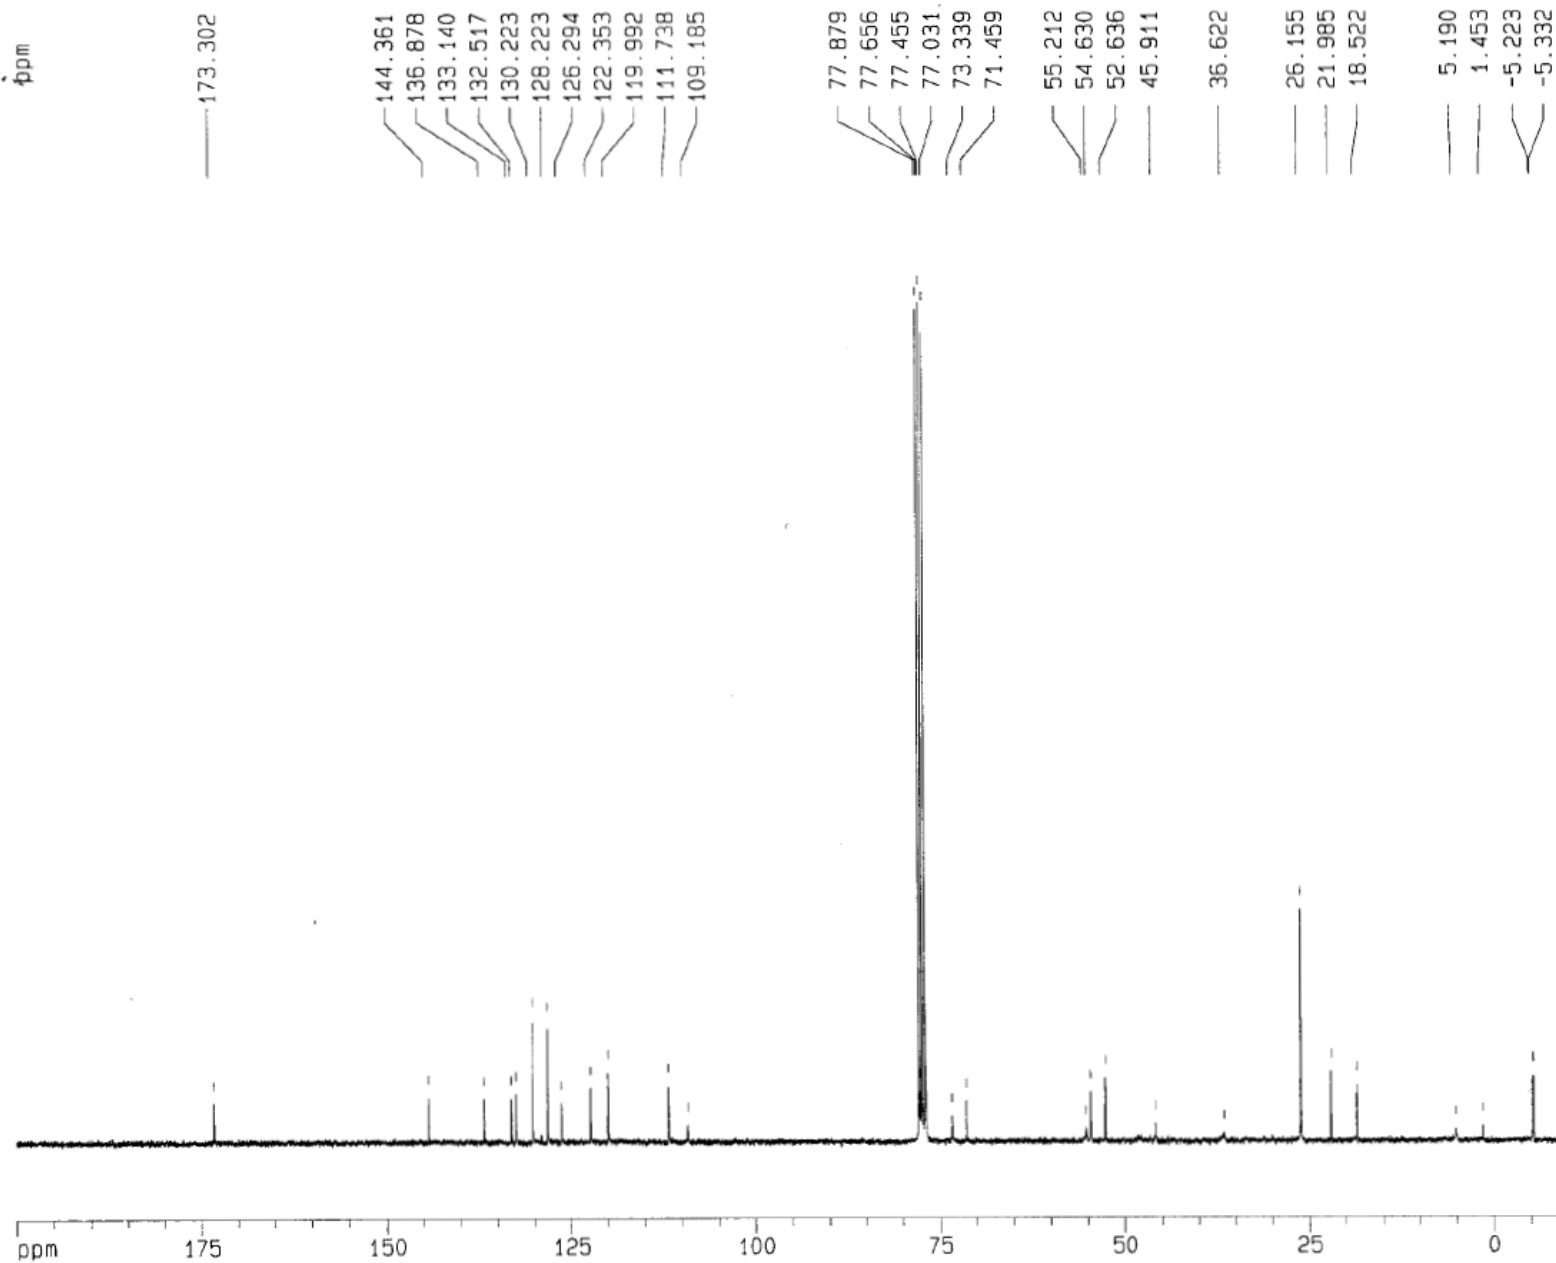

Current Data Parameters  
 NAME 090812FJII1294  
 EXPNO 2  
 PROCNO 1

F2 - Acquisition Parameters  
 Date\_ 20120908  
 Time 14.13  
 INSTRUM spect  
 PROBHD 5 mm GNP 1H/1  
 PULPROG zgpg30  
 TD 65536  
 SOLVENT CDCl3  
 NS 2848  
 DS 4  
 SWH 18796.992 Hz  
 FIDRES 0.286819 Hz  
 AQ 1.7433076 sec  
 RG 1625.5  
 DW 26.600 usec  
 DE 6.00 usec  
 TE 300.0 K  
 D1 2.0000000 sec  
 D11 0.0300000 sec  
 D12 0.0002000 sec

===== CHANNEL f1 =====  
 NUC1 13C  
 P1 5.25 usec  
 PL1 -6.00 dB  
 SF01 75.4106357 MHz

===== CHANNEL f2 =====  
 CPDPRG2 waltz16  
 NUC2 1H  
 PCPD2 115.00 usec  
 PL2 0.00 dB  
 PL12 19.70 dB  
 PL13 19.70 dB  
 SF02 299.8711995 MHz

F2 - Processing parameters  
 SI 32768  
 SF 75.4023410 MHz  
 WDW EM  
 SSB 0  
 LB 1.00 Hz  
 GB 0  
 PC 1.40

1D NMR plot parameters  
 CX 20.00 cm  
 F1P 200.000 ppm  
 F1 15080.47 Hz  
 F2P -10.000 ppm  
 F2 -754.02 Hz  
 PPMCM 10.50000 ppm/cm  
 HZCM 791.72461 Hz/cm

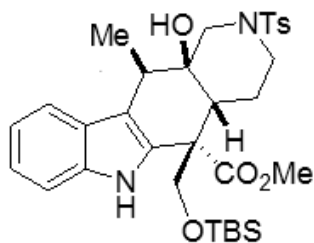

28

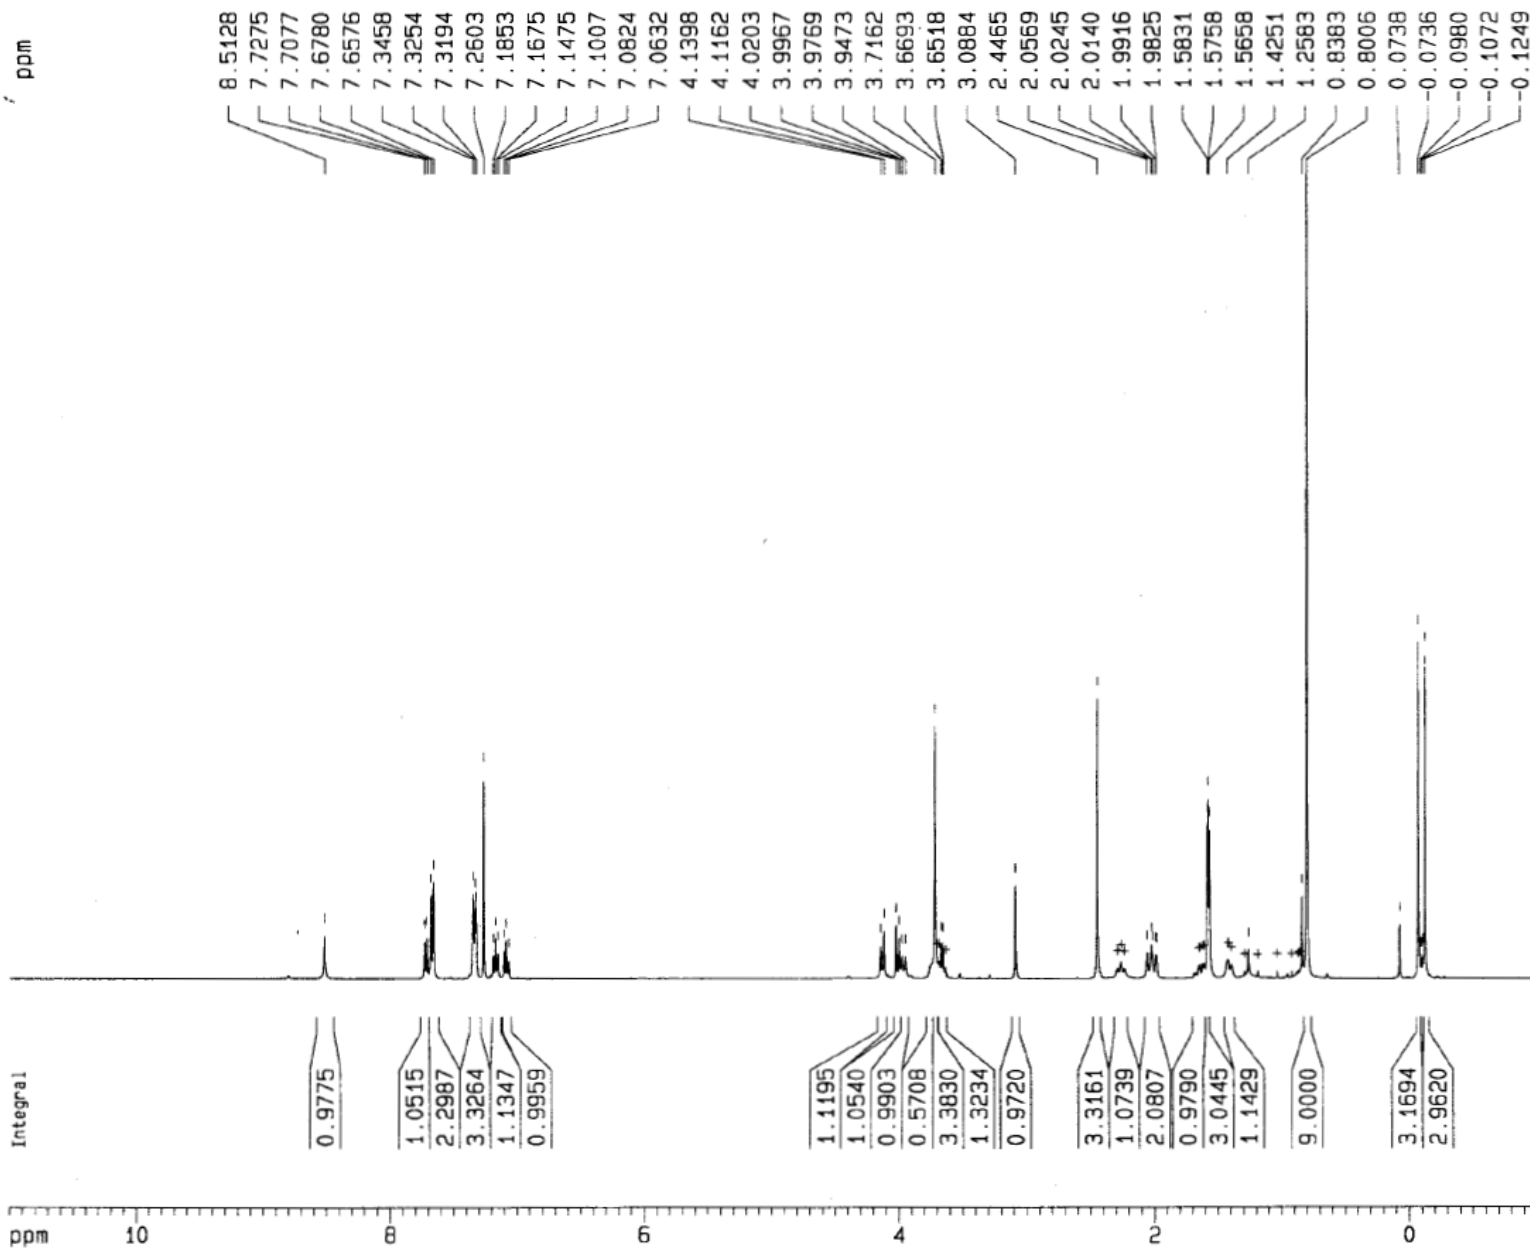

Current Data Parameters  
NAME 090912FJIII296  
EXPNO 1  
PROCNO 1

F2 - Acquisition Parameters  
Date\_ 20120909  
Time 22.57  
INSTRUM spect  
PROBHD 5 mm BBI 1H-  
PULPROG zg30  
TD 65536  
SOLVENT CDC13  
NS 16  
DS 2  
SWH 8278.146 Hz  
FIDRES 0.126314 Hz  
AQ 3.9584243 sec  
RG 724.1  
DW 60.400 usec  
DE 6.00 usec  
TE 300.0 K  
D1 1.00000000 sec

===== CHANNEL f1 =====  
NUC1 1H  
P1 6.45 usec  
PL1 0.00 dB  
SF01 400.1324710 MHz

F2 - Processing parameters  
SI 32768  
SF 400.1300091 MHz  
WDW EM  
SSB 0  
LB 0.30 Hz  
GB 0  
PC 1.00

1D NMR plot parameters  
CX 20.00 cm  
F1P 11.000 ppm  
F1 4401.43 Hz  
F2P -1.000 ppm  
F2 -400.13 Hz  
PPMCM 0.60000 ppm/cm  
HZCM 240.07800 Hz/cm



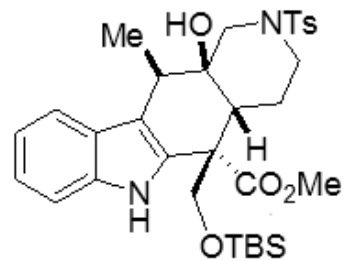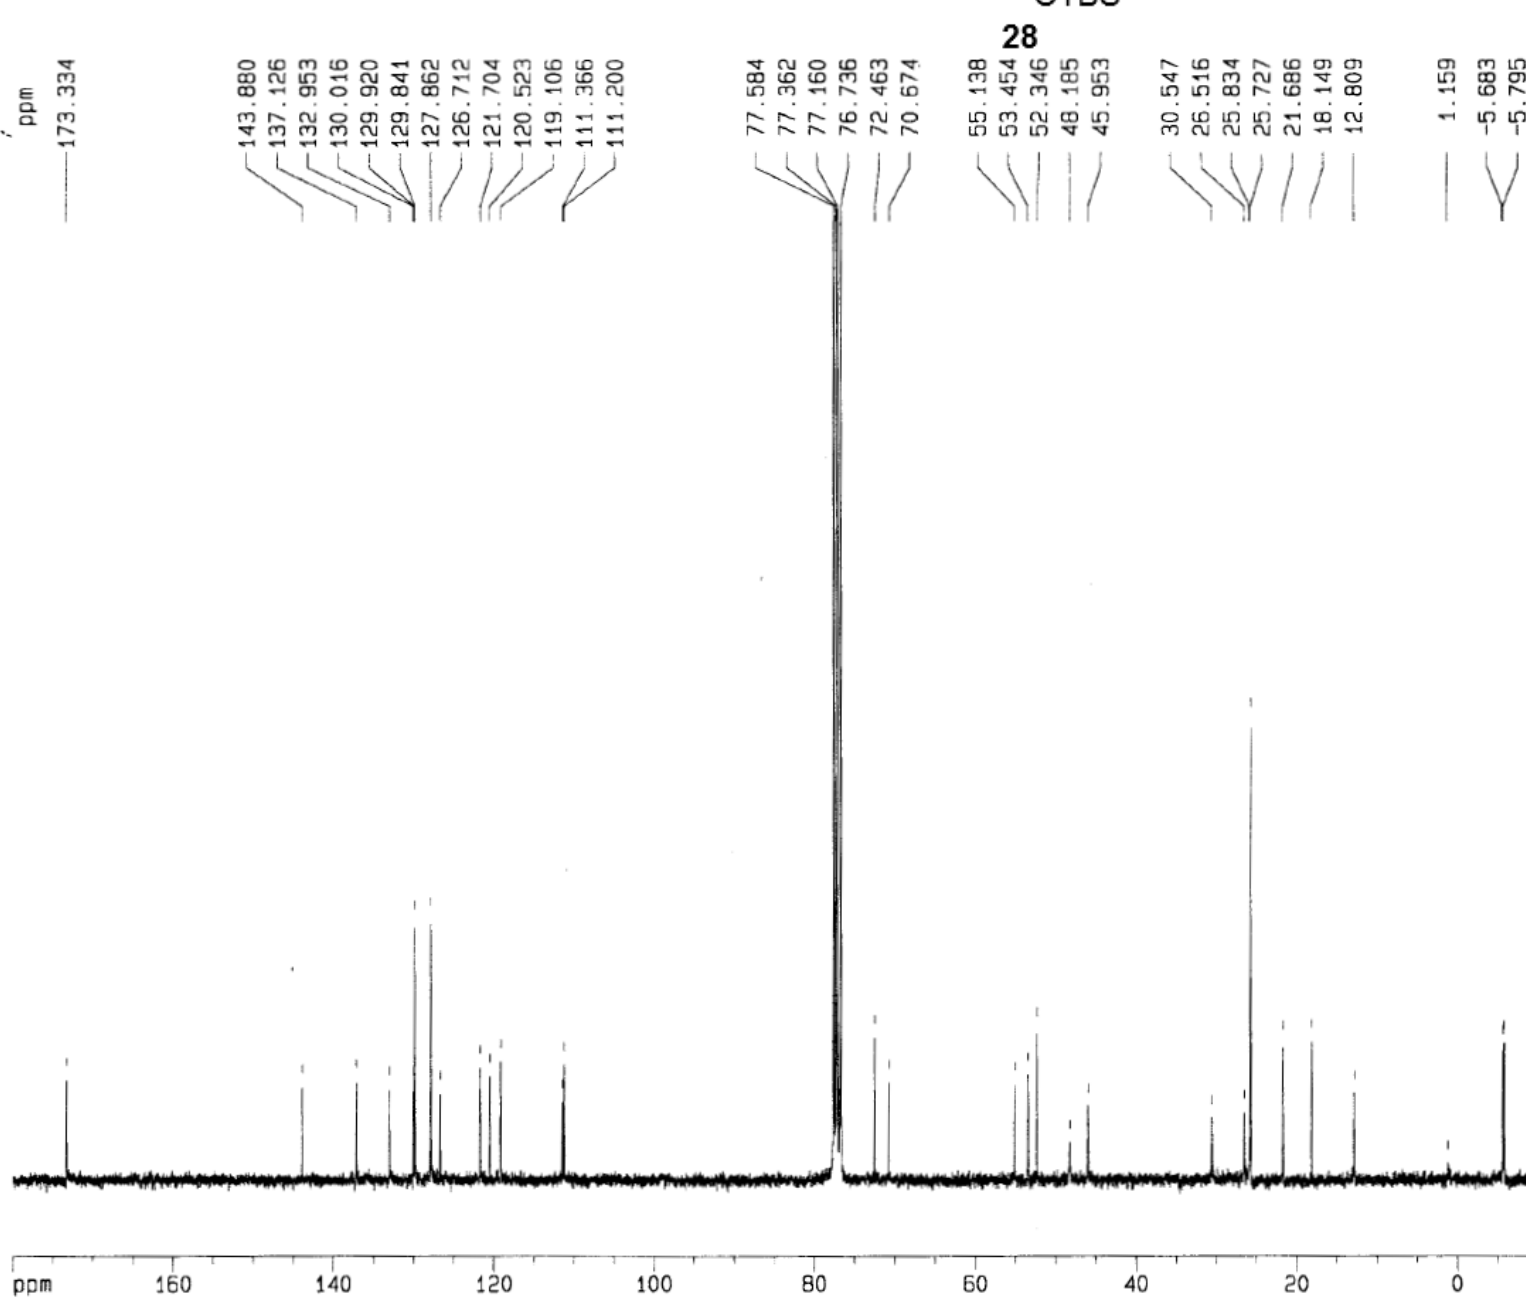

Current Data Parameters  
NAME 090912FJ111296  
EXPNO 1

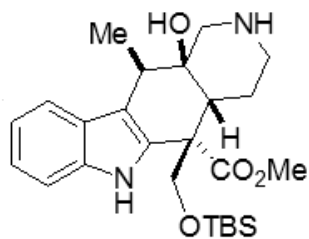

29

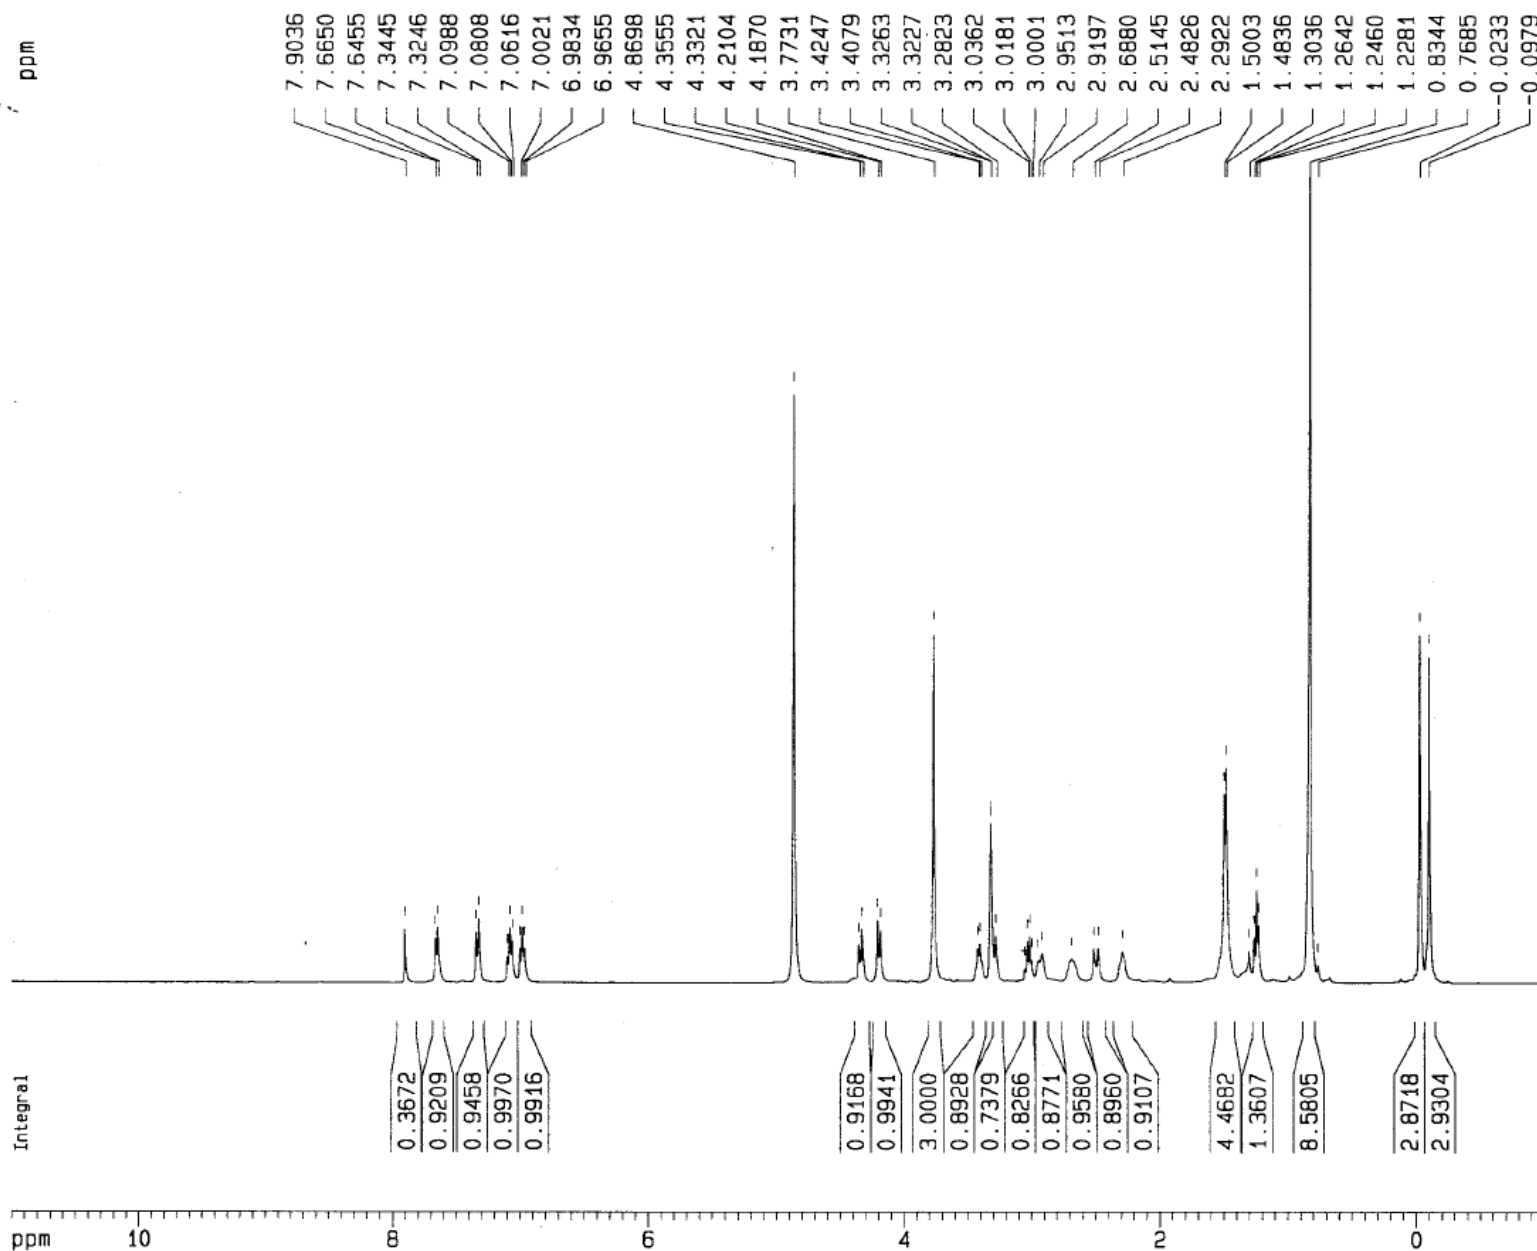

Current Data Parameters  
 NAME 091212FJIII299  
 EXPNO 3  
 PROCNO 1

F2 - Acquisition Parameters  
 Date\_ 20120912  
 Time 20.11  
 INSTRUM spect  
 PROBHD 5 mm BBI 1H-  
 PULPROG zg30  
 TD 65536  
 SOLVENT MeOH  
 NS 16  
 DS 2  
 SWH 8278.146 Hz  
 FIDRES 0.126314 Hz  
 AQ 3.9584243 sec  
 RG 101.6  
 DW 60.400 usec  
 DE 6.00 usec  
 TE 300.0 K  
 D1 1.00000000 sec

===== CHANNEL f1 =====  
 NUC1 1H  
 P1 6.45 usec  
 PL1 0.00 dB  
 SF01 400.1324710 MHz

F2 - Processing parameters  
 SI 32768  
 SF 400.1300009 MHz  
 WDW EM  
 SSB 0  
 LB 0.30 Hz  
 GB 0  
 PC 1.00

1D NMR plot parameters  
 CX 20.00 cm  
 F1P 11.000 ppm  
 F1 4401.43 Hz  
 F2P -1.000 ppm  
 F2 -400.13 Hz  
 PPMCM 0.60000 ppm/cm  
 HZCM 240.07800 Hz/cm

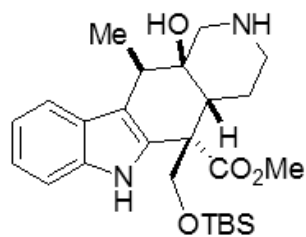

29

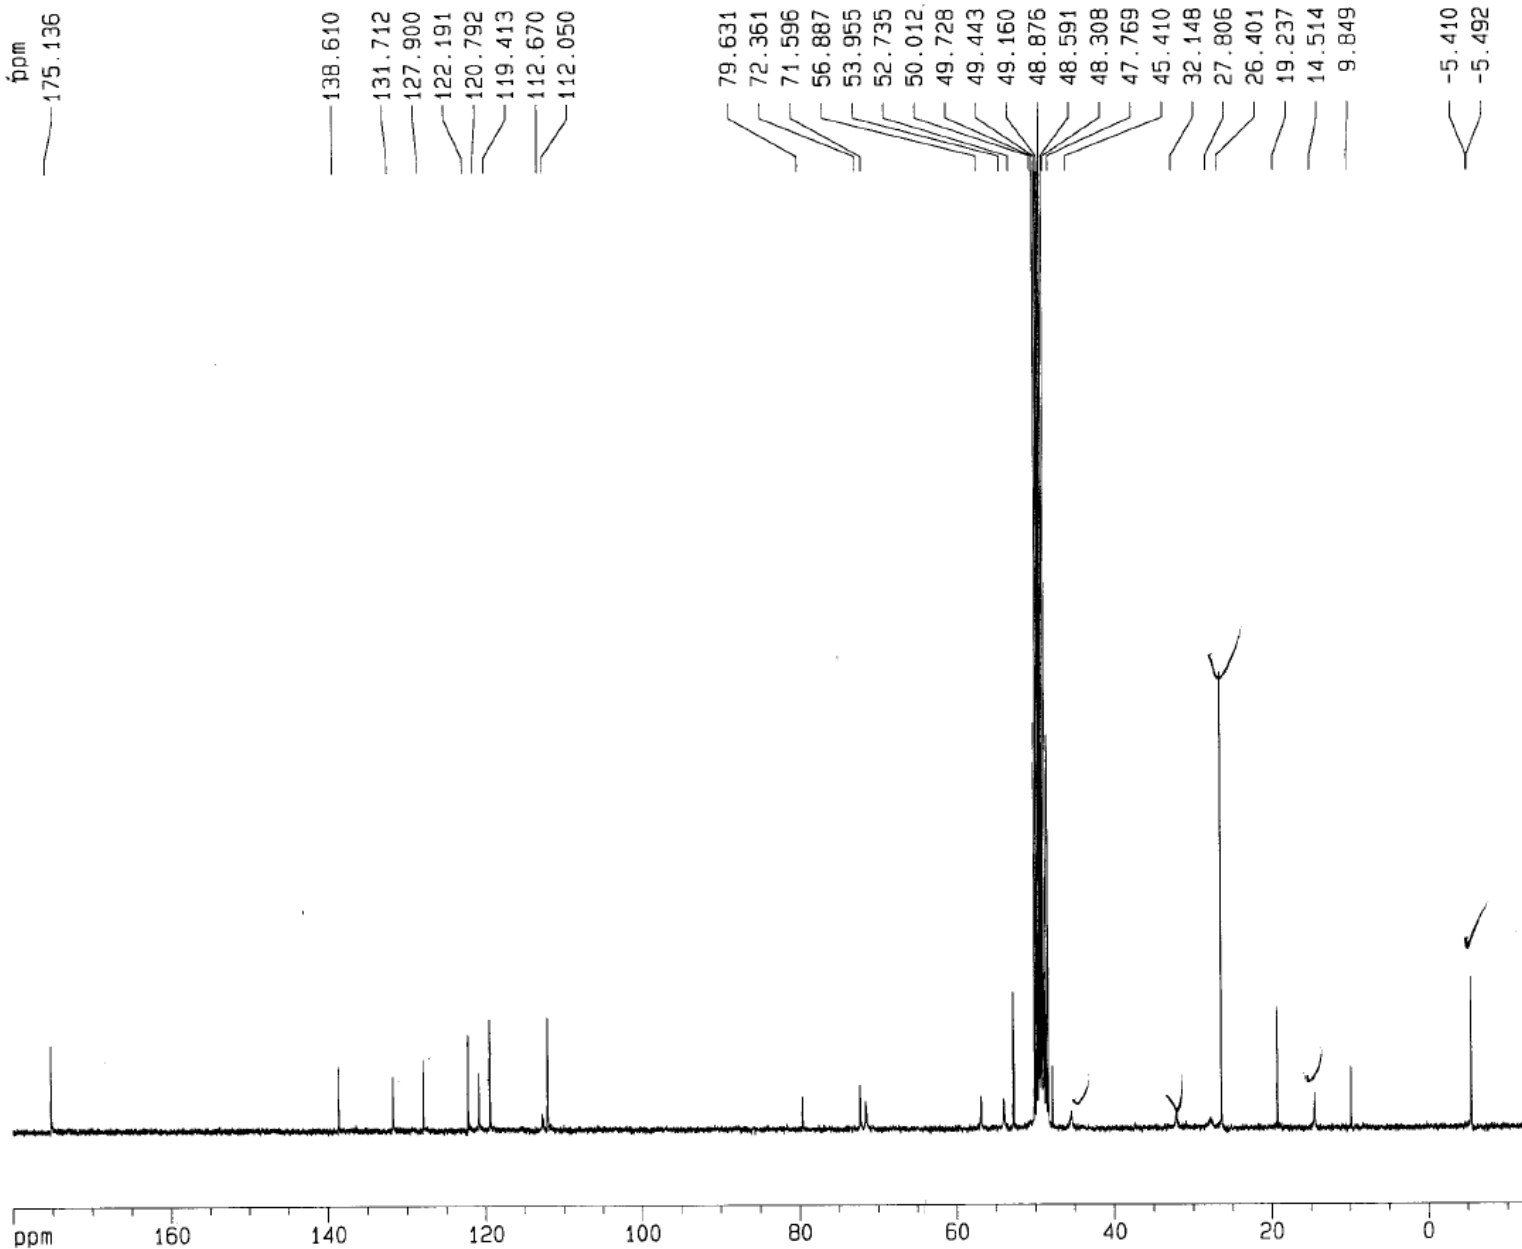

Current Data Parameters  
 NAME 091312FJII299  
 EXPNO 2  
 PROCNO 1

F2 - Acquisition Parameters  
 Date\_ 20120913  
 Time 20.19  
 INSTRUM spect  
 PROBHD 5 mm GNP 1H/1  
 PULPROG zgpg30  
 TD 65536  
 SOLVENT MeOH  
 NS 5720  
 DS 4  
 SWH 18796.992 Hz  
 FIDRES 0.286819 Hz  
 AQ 1.7433076 sec  
 RG 512  
 DW 26.600 usec  
 DE 6.00 usec  
 TE 300.0 K  
 D1 2.00000000 sec  
 D11 0.03000000 sec  
 D12 0.00002000 sec

----- CHANNEL f1 -----  
 NUC1 13C  
 P1 5.25 usec  
 PL1 -6.00 dB  
 SFO1 75.4106357 MHz

----- CHANNEL f2 -----  
 CPDPRG2 waltz16  
 NUC2 1H  
 PCPD2 115.00 usec  
 PL2 0.00 dB  
 PL12 19.70 dB  
 PL13 19.70 dB  
 SFO2 299.8711995 MHz

F2 - Processing parameters  
 SI 32768  
 SF 75.4022561 MHz  
 HDW EM  
 SSB 0  
 LB 1.00 Hz  
 GB 0  
 PC 1.40

1D NMR plot parameters  
 CX 20.00 cm  
 F1P 180.000 ppm  
 F1 13572.41 Hz  
 F2P -15.000 ppm  
 F2 -1131.03 Hz  
 PPMCM 9.75000 ppm/cm  
 HZCM 735.17212 Hz/cm

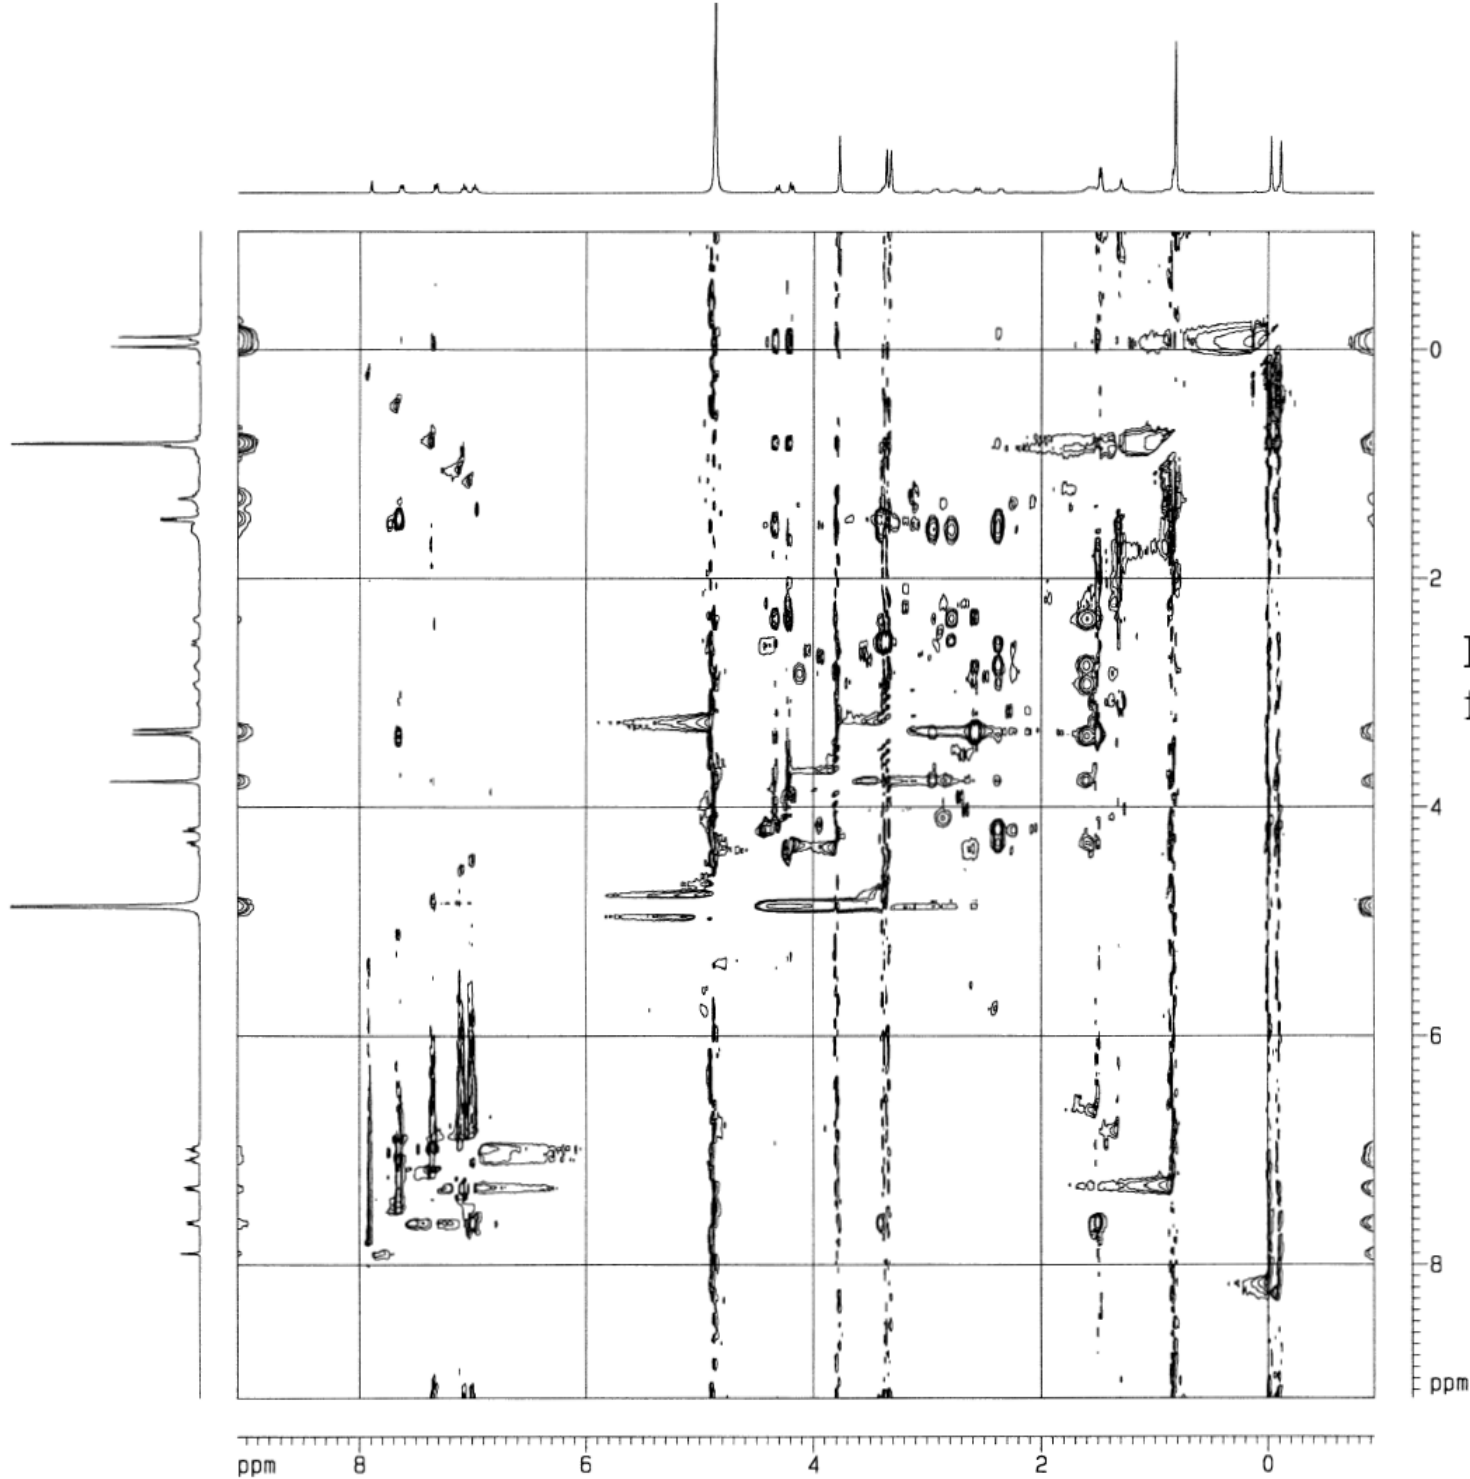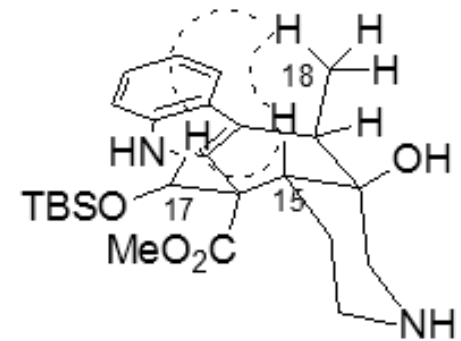

Key nOe correlations  
for piperidine 29

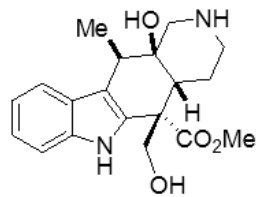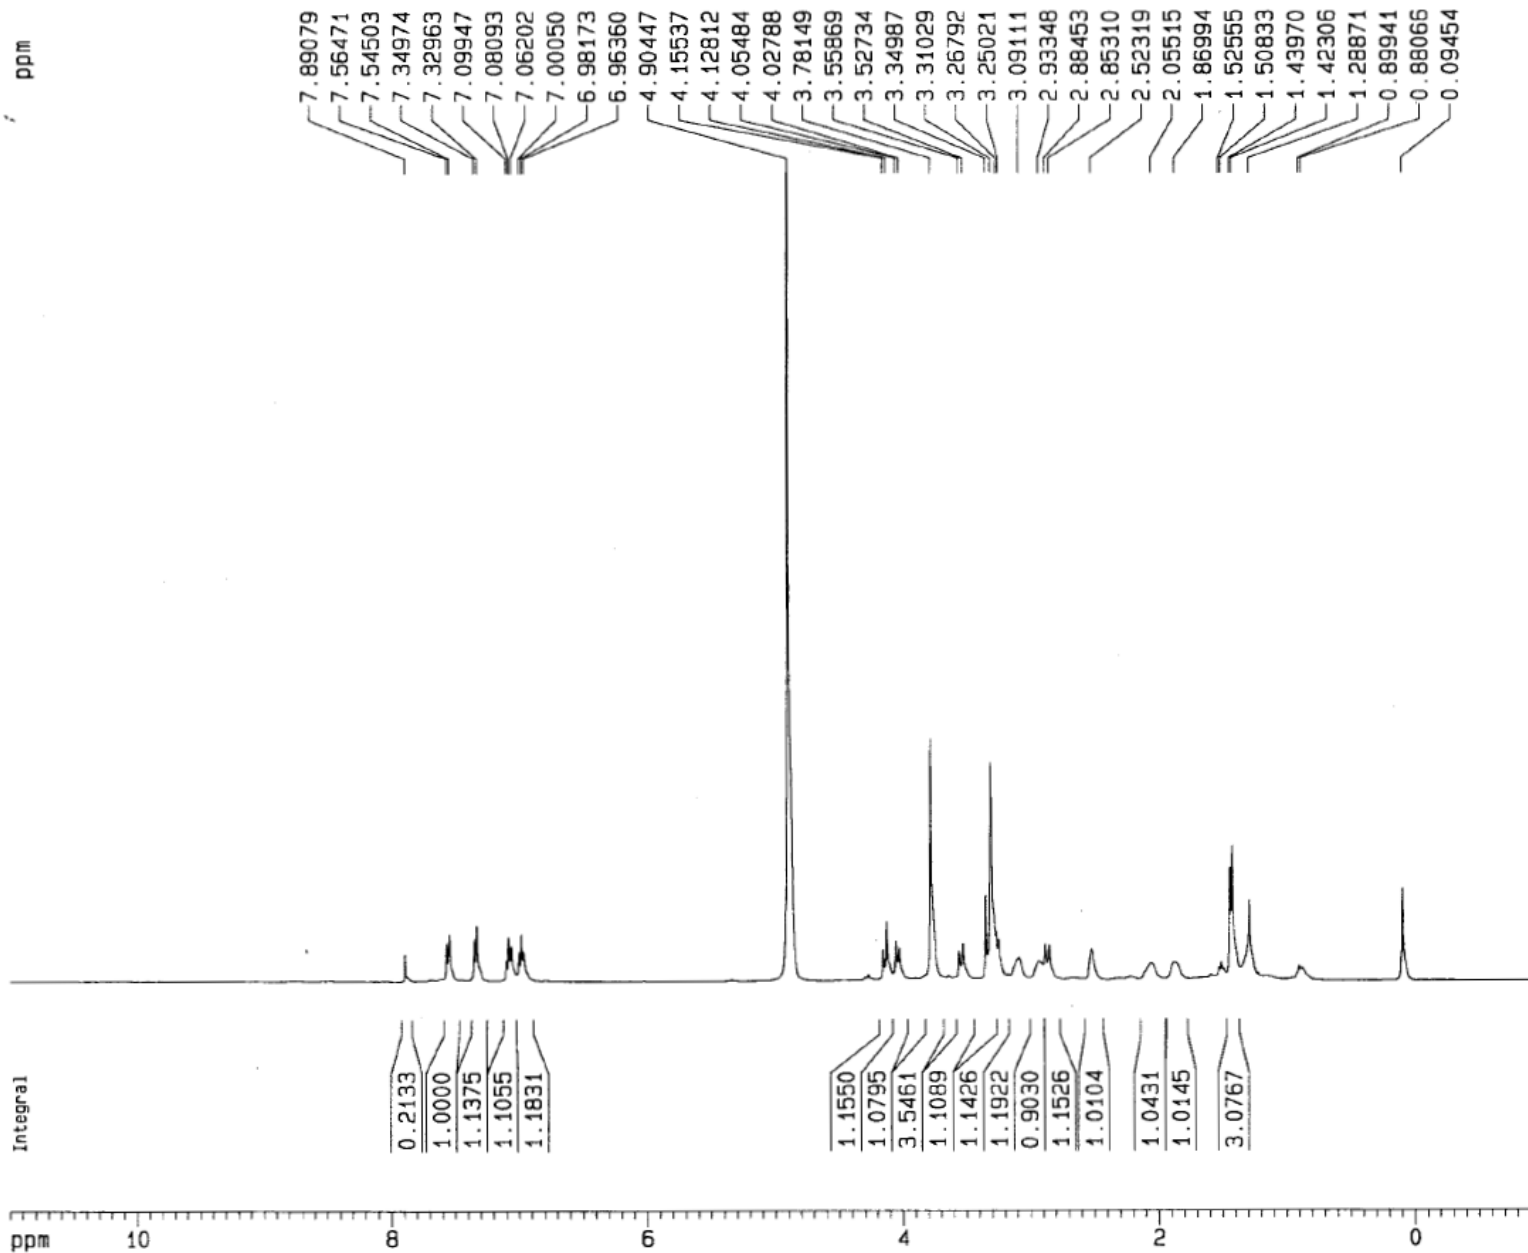

Current Data Parameters  
 NAME 092012FJV015  
 EXPNO 2  
 PROCNO 1

F2 - Acquisition Parameters  
 Date\_ 20120920  
 Time 20.21  
 INSTRUM spect  
 PROBHD 5 mm BBI 1H-  
 PULPROG zg30  
 TD 65536  
 SOLVENT MeOH  
 NS 16  
 DS 2  
 SWH 8278.146 Hz  
 FIDRES 0.126314 Hz  
 AQ 3.9584243 sec  
 RG 143.7  
 DW 60.400 usec  
 DE 6.00 usec  
 TE 300.0 K  
 D1 1.00000000 sec

===== CHANNEL f1 =====  
 NUC1 1H  
 P1 6.45 usec  
 PL1 0.00 dB  
 SF01 400.1324710 MHz

F2 - Processing parameters  
 SI 32768  
 SF 400.1300067 MHz  
 WDW EM  
 SSB 0  
 LB 0.30 Hz  
 GB 0  
 PC 1.00

1D NMR plot parameters  
 CX 20.00 cm  
 F1P 11.000 ppm  
 F1 4401.43 Hz  
 F2P -1.000 ppm  
 F2 -400.13 Hz  
 PPMCM 0.60000 ppm/cm  
 HZCM 240.07800 Hz/cm

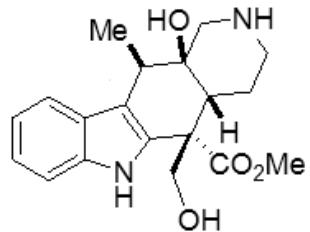

(+)-3

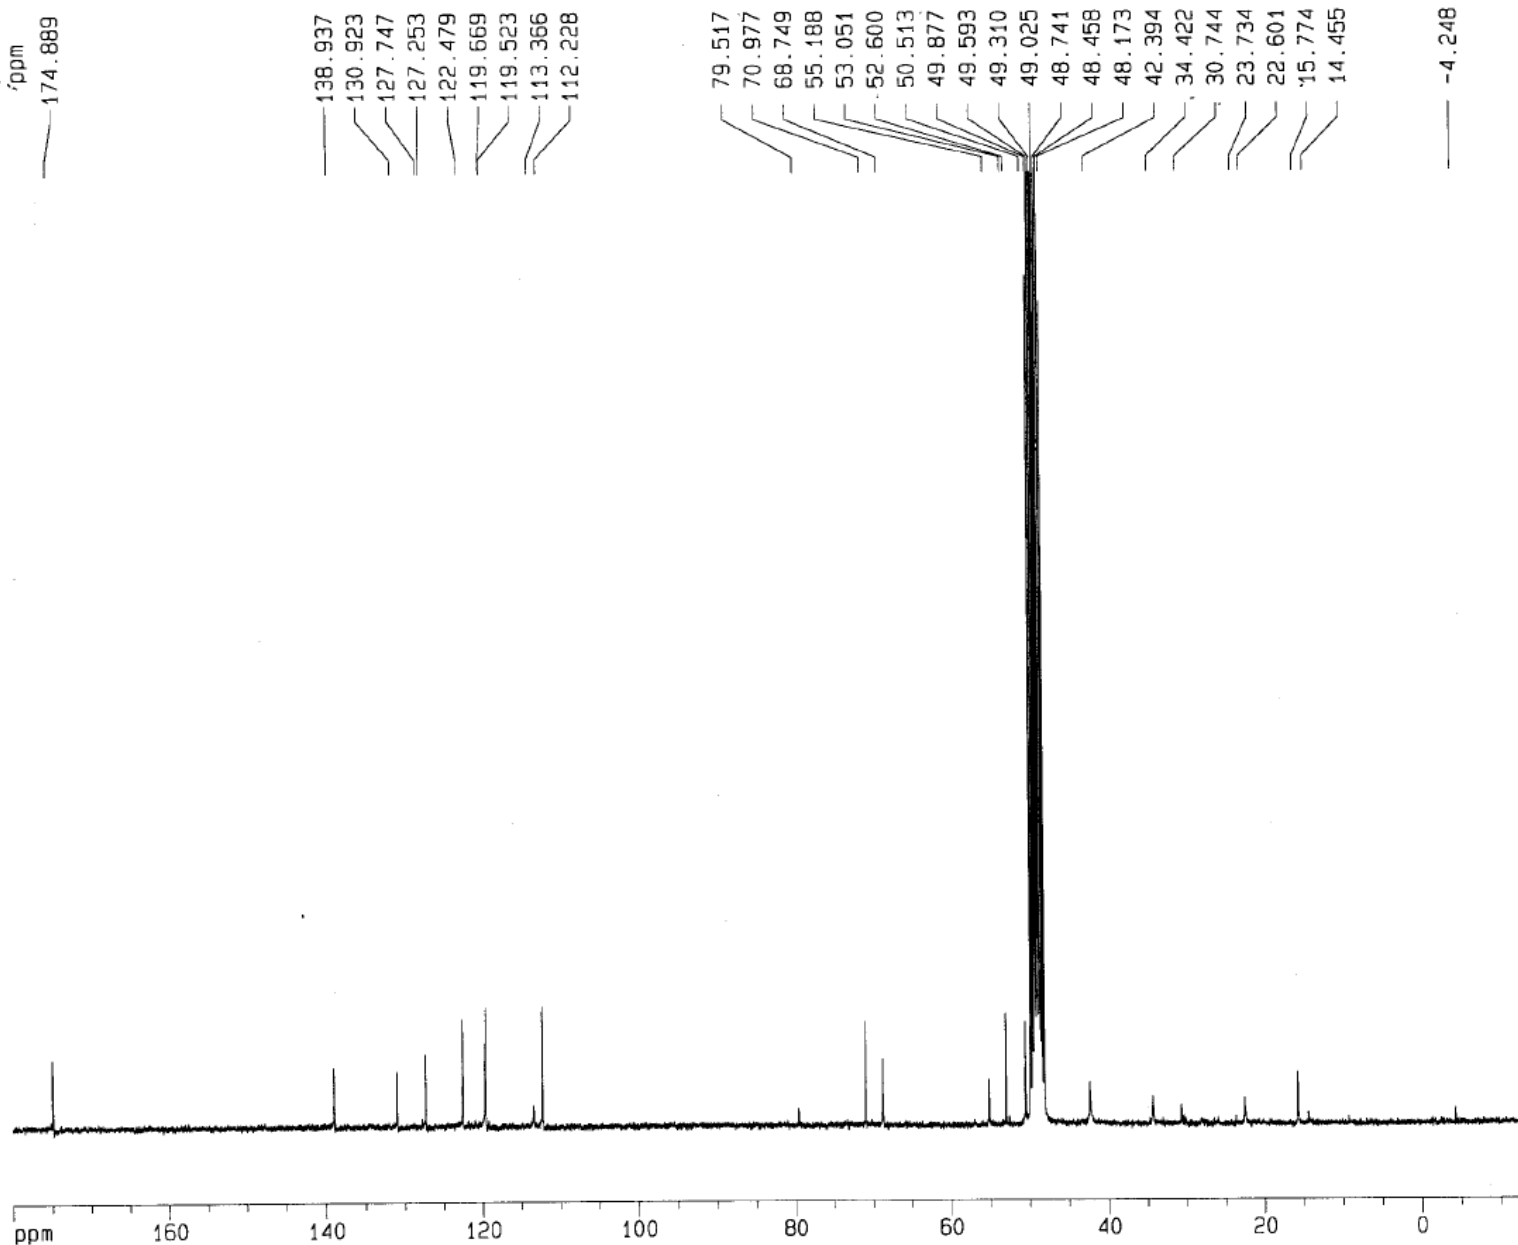

Current Data Parameters  
 NAME 092112FJV015  
 EXPNO 2  
 PROCNO 1

F2 - Acquisition Parameters  
 Date\_ 20120922  
 Time 3.55  
 INSTRUM spect  
 PROBHD 5 mm QNP 1H/1  
 PULPROG zgpg30  
 TD 65536  
 SOLVENT MeOH  
 NS 11264  
 DS 4  
 SWH 18796.992 Hz  
 FIDRES 0.286819 Hz  
 AQ 1.7433076 sec  
 RG 8192  
 DW 26.600 usec  
 DE 6.00 usec  
 TE 300.0 K  
 D1 2.00000000 sec  
 D11 0.03000000 sec  
 D12 0.00002000 sec

----- CHANNEL f1 -----  
 NUC1 13C  
 P1 5.25 usec  
 PL1 -6.00 dB  
 SF01 75.4106357 MHz

----- CHANNEL f2 -----  
 CPDPRG2 waltz16  
 NUC2 1H  
 PCPD2 115.00 usec  
 PL2 0.00 dB  
 PL12 19.70 dB  
 PL13 19.70 dB  
 SF02 299.8711995 MHz

F2 - Processing parameters  
 SI 32768  
 SF 75.4022676 MHz  
 WDW EM  
 SSB 0  
 LB 1.00 Hz  
 GB 0  
 PC 1.40

1D NMR plot parameters  
 CX 20.00 cm  
 F1P 180.000 ppm  
 F1 13572.41 Hz  
 F2P -15.000 ppm  
 F2 -1131.03 Hz  
 PPMCM 9.75000 ppm/cm  
 HZCM 735.17218 Hz/cm

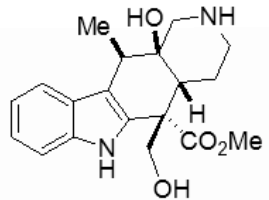**(±)-3**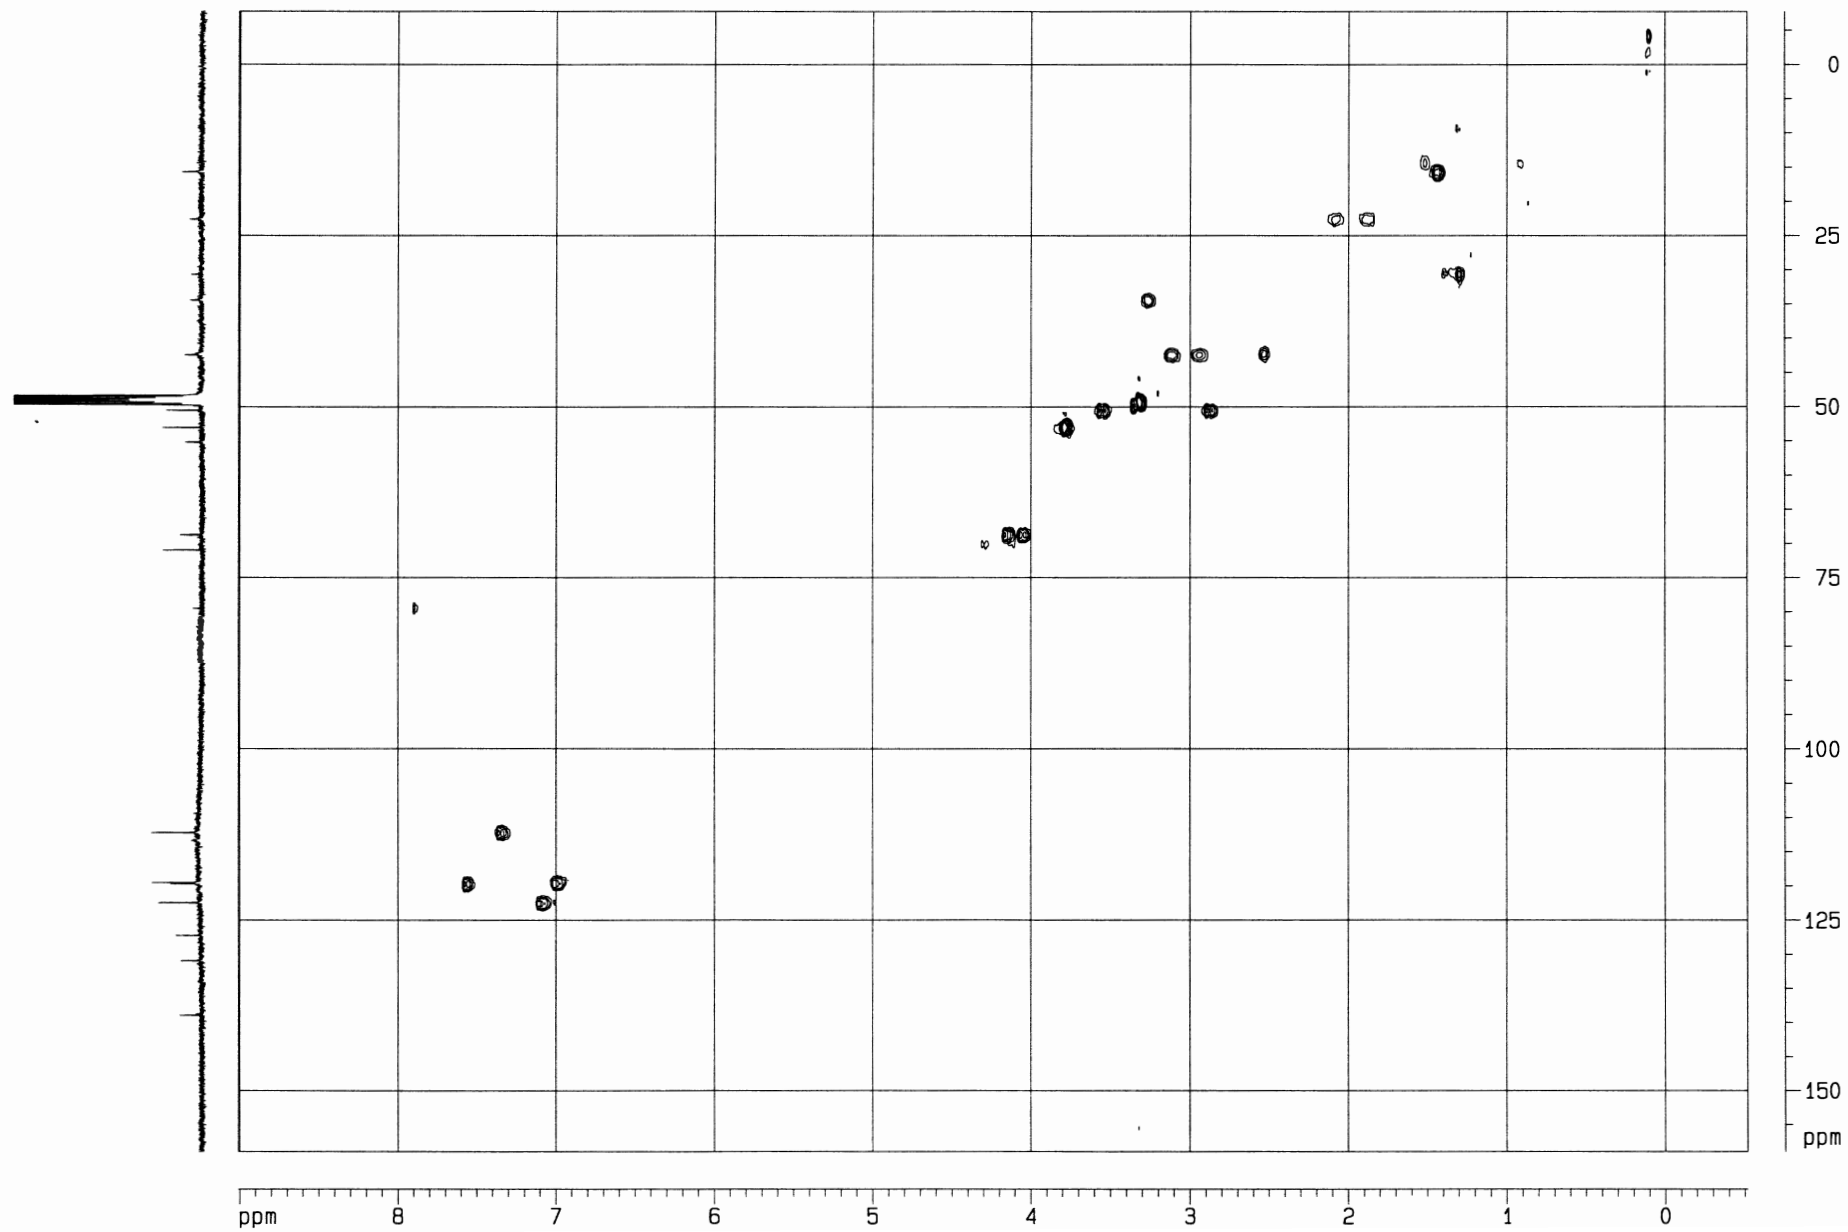

Selected HMBC correlations  
for alstilobanine A ((±)-3)

FYQ-V-015 HMBC d4-MeOD

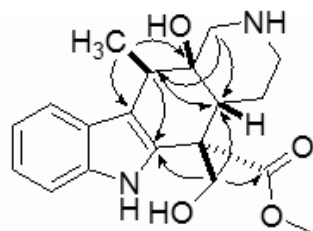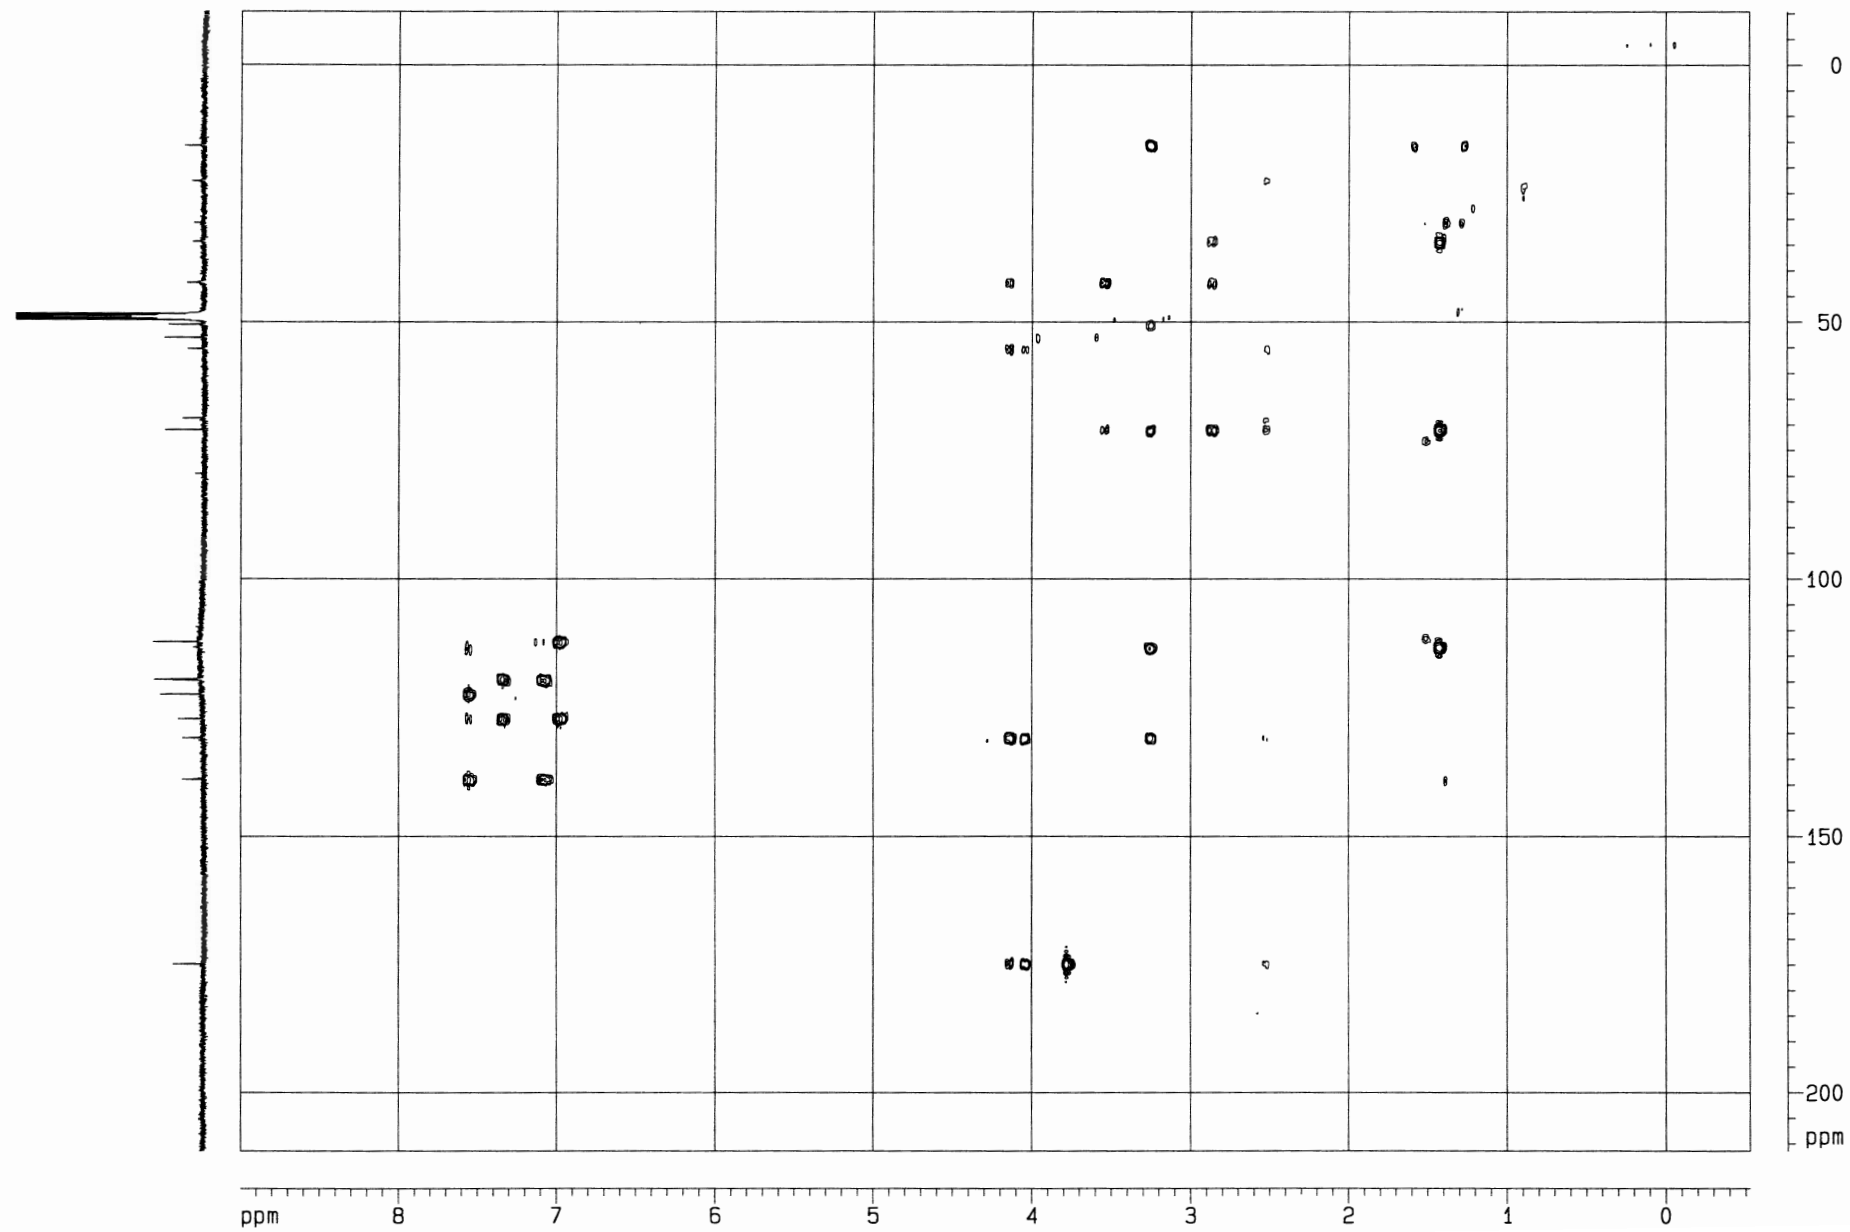



S81

FYQ-V-015 COSY d4-MeOD

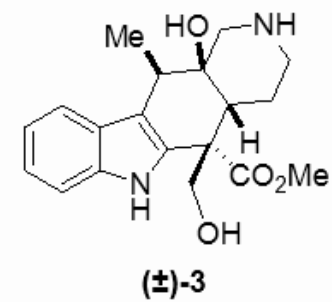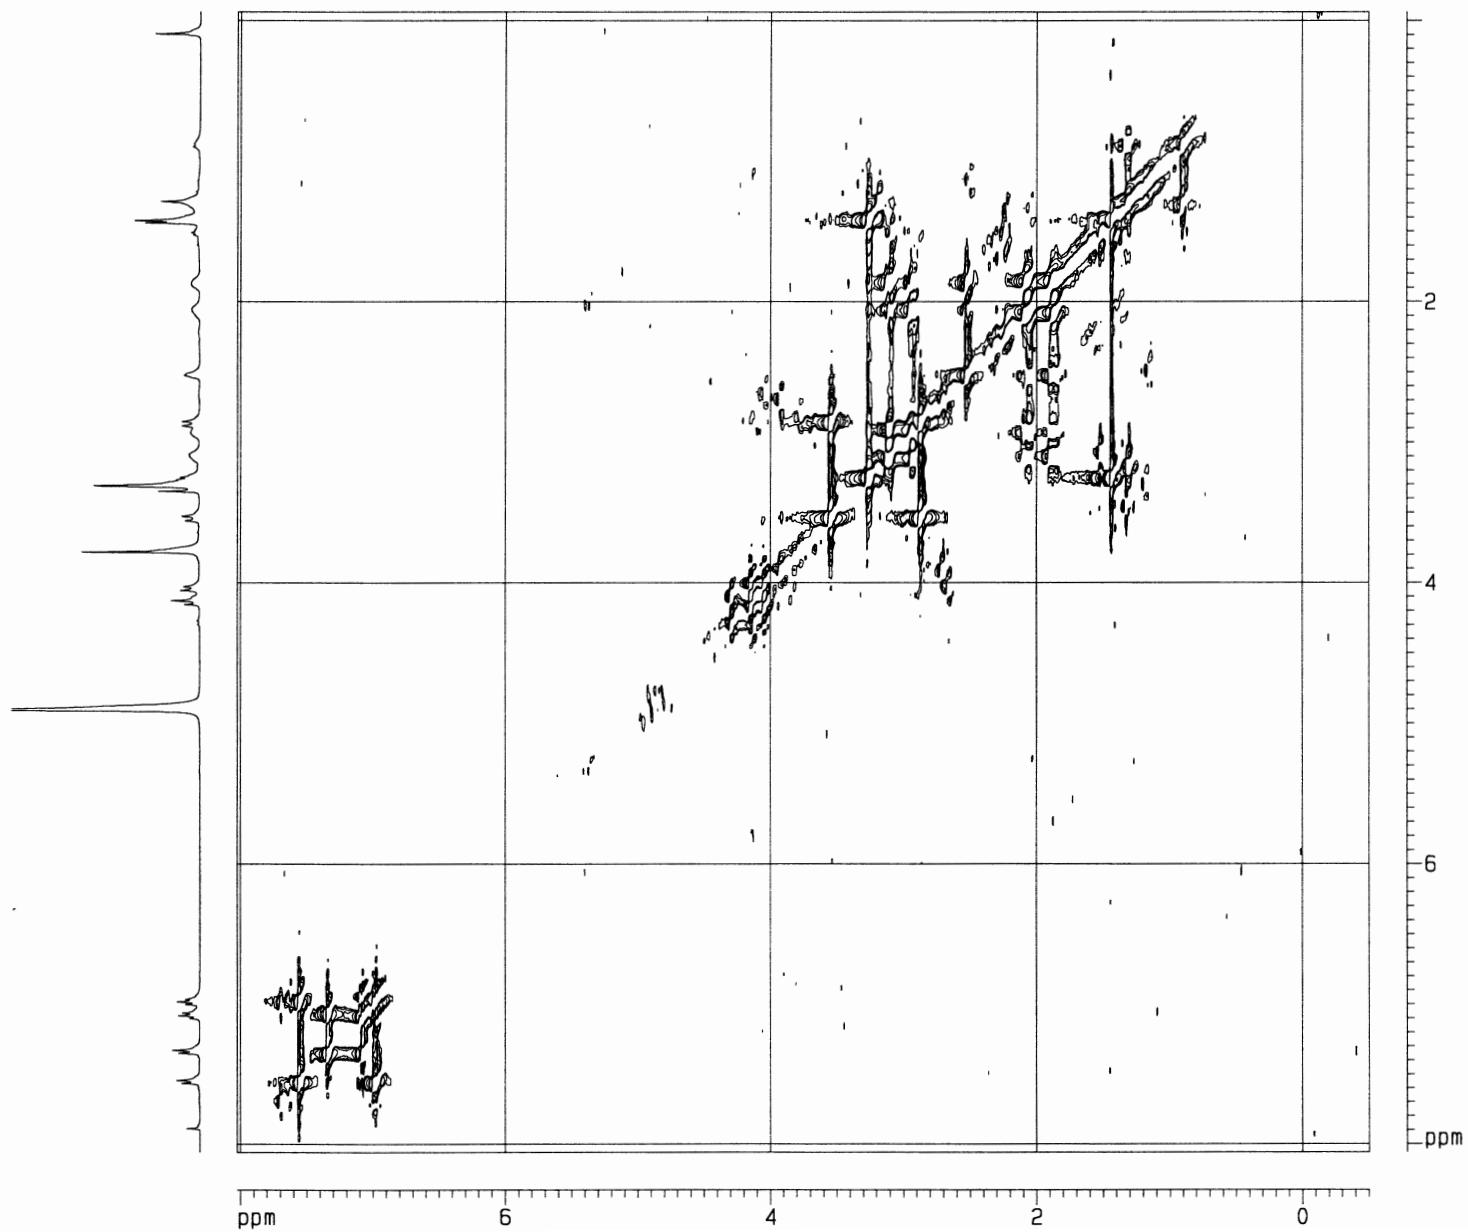

FYQ-V-015 NOESY d4-MeOD

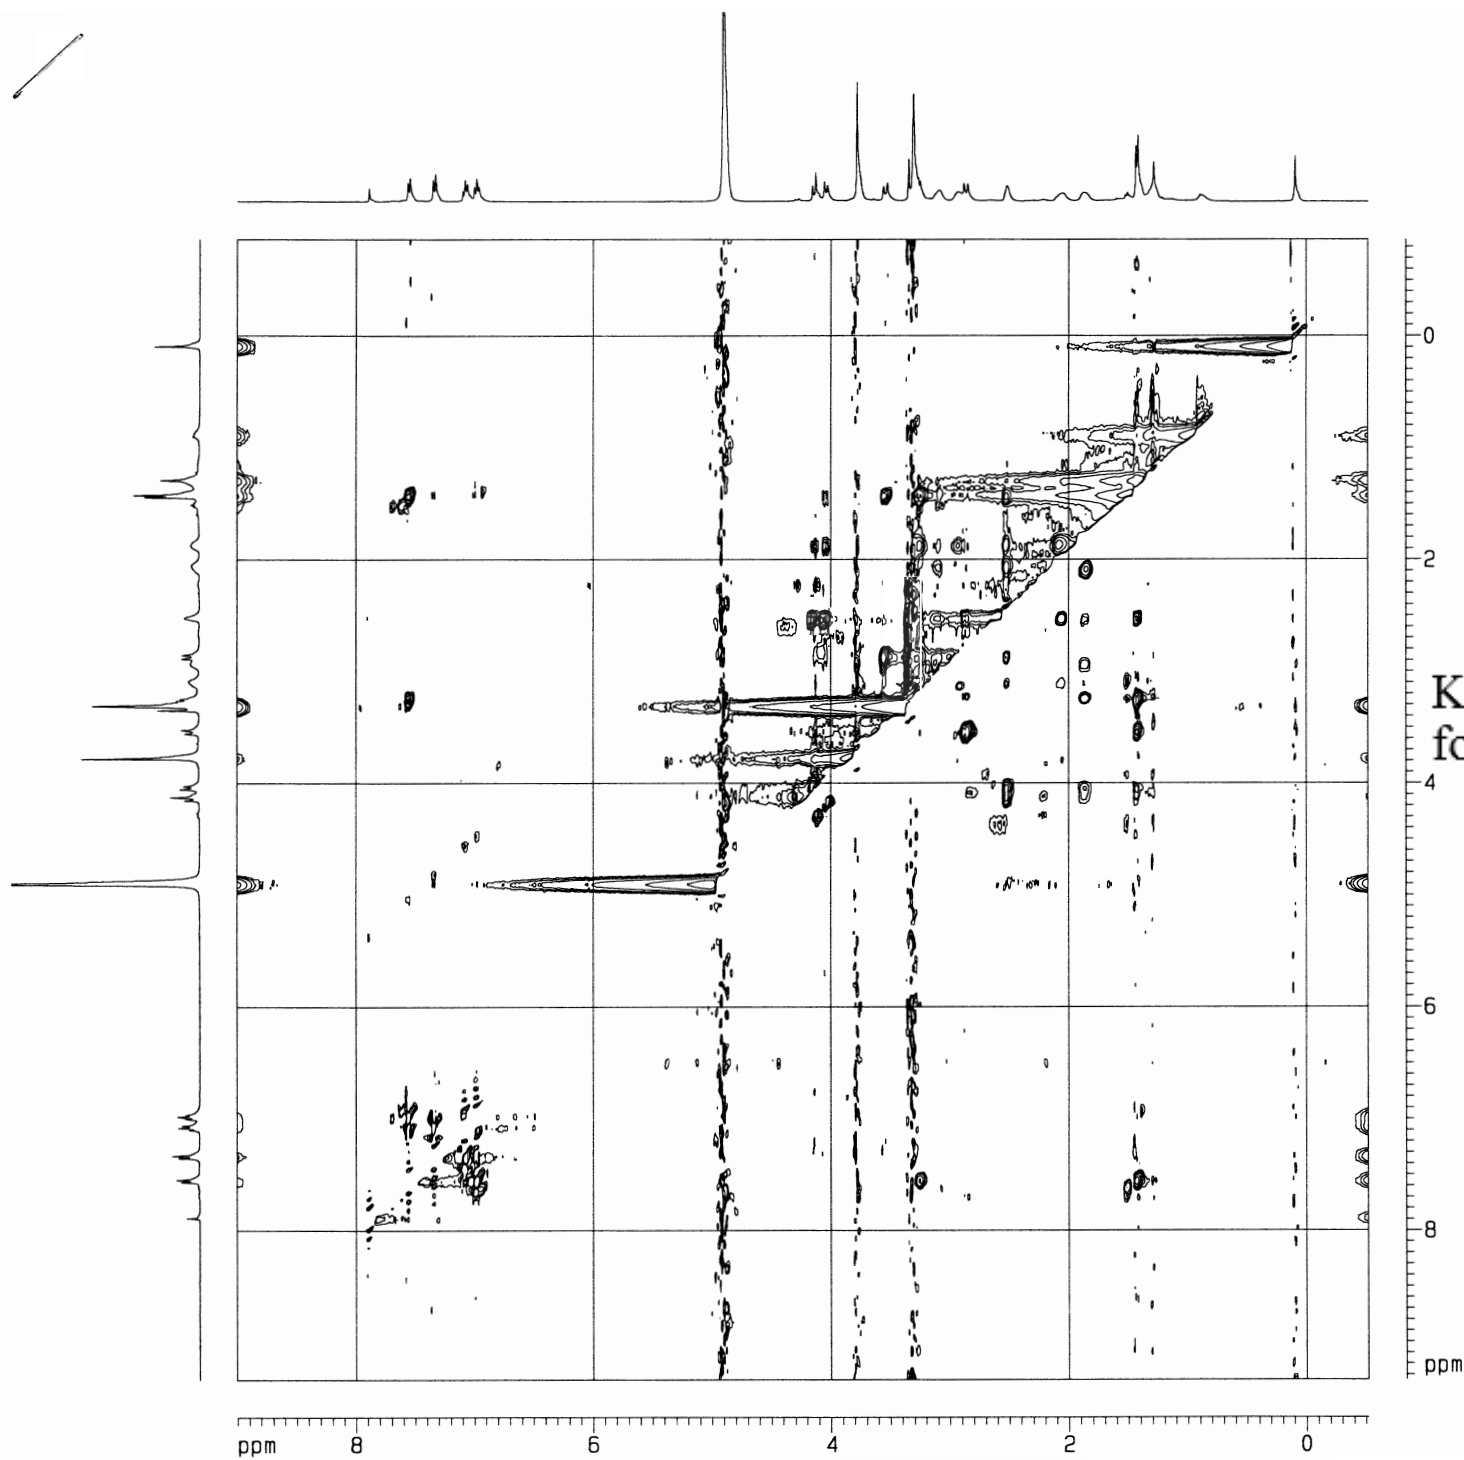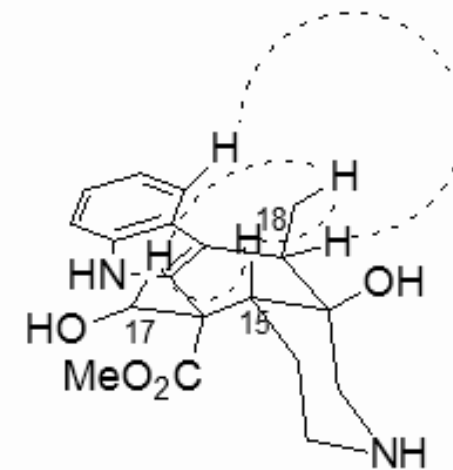

Key nOe correlations  
for alstilobanine A ((±)-3)
